# Supplementary material for: Reduced complexity model intercomparison project phase 1: Protocol, results and initial observations
Source: Copernicus journal article supplement (doi:10.5194/gmd-2019-375), 2020-01-21
Supplement: Supplementary file 1 [file gmd-2019-375-supplement.pdf]

# Reduced complexity model intercomparison project phase 1: Protocol, results and initial observations: supplementary information

Zebedee R. J. Nicholls<sup>1,2</sup>, Malte Meinshausen<sup>1,2,3</sup>, Jared Lewis<sup>1</sup>, Robert Gieseke<sup>3</sup>, Dietmar Dommenget<sup>4</sup>, Kalyn Dorheim<sup>5</sup>, Chen-Shuo Fan<sup>4</sup>, Jan S. Fuglestad<sup>6</sup>, Thomas Gasser<sup>7</sup>, Ulrich Golücke<sup>8</sup>, Philip Goodwin<sup>9</sup>, Elmar Kriegler<sup>3</sup>, Nicholas J. Leach<sup>10</sup>, Davide Marchegiani<sup>4</sup>, Yann Quilcaille<sup>7</sup>, Bjørn H. Samset<sup>6</sup>, Marit Sandstad<sup>6</sup>, Alexey N. Shiklomanov<sup>5</sup>, Ragnhild B. Skeie<sup>6</sup>, Christopher J. Smith<sup>11</sup>, Katsumasa Tanaka<sup>12,13</sup>, Junichi Tsutsui<sup>14</sup>, and Zhiang Xie<sup>4</sup>

<sup>1</sup>Australian–German Climate and Energy College, The University of Melbourne, Parkville, Victoria, Australia

<sup>2</sup>School of Earth Sciences, The University of Melbourne, Parkville, Victoria, Australia

<sup>3</sup>Potsdam Institute for Climate Impact Research (PIK), Member of the Leibniz Association, Potsdam, Germany

<sup>4</sup>Monash University, School of Earth, Atmosphere and Environment, Clayton, Victoria 3800, Australia

<sup>5</sup>Joint Global Change Research Institute, Pacific Northwest National Laboratory, College Park, MD, USA

<sup>6</sup>CICERO Center for International Climate Research, Oslo, Norway

<sup>7</sup>International Institute for Applied Systems Analysis (IIASA), Laxenburg, Austria

<sup>8</sup>BI Norwegian Business School, Nydalsveien 37, 0484 Oslo, Norway

<sup>9</sup>School of Ocean and Earth Science, University of Southampton, Southampton, UK

<sup>10</sup>Department of Physics, Atmospheric Oceanic and Planetary Physics, University of Oxford, United Kingdom

<sup>11</sup>Priestley International Centre for Climate, University of Leeds, UK

<sup>12</sup>National Institute for Environmental Studies (NIES), Tsukuba, Japan

<sup>13</sup>Laboratoire des Sciences du Climat et de l'Environnement (LSCE), Commissariat à l'énergie atomique et aux énergies alternatives (CEA), Gif sur Yvette, France

<sup>14</sup>Central Research Institute of Electric Power Industry, Abiko, Japan

**Correspondence:** Zebedee Nicholls (zebedee.nicholls@climate-energy-college.org)

**Table S1.** Overview of the technical components of the models participating in RCMIP Phase 1.

| Model           | Development home | License                                  | Approximate release frequency | Codebase size (approximate lines of code) | Simulation years second (approximate for a single core machine) | Language, format and support platforms                                                                                                                                                                               | Code testing                                                                              |
|-----------------|------------------|------------------------------------------|-------------------------------|-------------------------------------------|-----------------------------------------------------------------|----------------------------------------------------------------------------------------------------------------------------------------------------------------------------------------------------------------------|-------------------------------------------------------------------------------------------|
| ACC2            | Internal only    |                                          |                               | 50 000                                    | 100                                                             | GAMS                                                                                                                                                                                                                 | Manual validation and verification                                                        |
| AR5IR variants) | N/A              | AGPLv3                                   | N/A                           | 500                                       | 5 000                                                           | Python 3.7 ( <a href="https://github.com/openclimatedata/openscm/blob/ar5ir-notebooks/notebooks/ar5ir_rcmip.ipynb">https://github.com/openclimatedata/openscm/blob/ar5ir-notebooks/notebooks/ar5ir_rcmip.ipynb</a> ) | Manual validation and verification                                                        |
| CICERO-SCM      | Internal only    |                                          |                               | 3000                                      |                                                                 |                                                                                                                                                                                                                      | Fortran 90                                                                                |
| ESCIMO          |                  | GNU GPLv3                                |                               |                                           |                                                                 | Vensim                                                                                                                                                                                                               | Manual validation and verification                                                        |
| FaIR            | GitHub           | Apache 2.0                               | Sub-yearly                    | 3 500                                     | 3 500                                                           | Python 2.7, 3.5, 3.6, 3.7. Linux, macOS and Windows.                                                                                                                                                                 | Unit tests and continuous integration.                                                    |
| GIR             | GitHub           | Creative Commons Attribution 4.0 License |                               | 250                                       | 200 000                                                         | Python 3.6+ (recommended), Excel, MatLAB and IDL available upon request. Linux, macOS and Windows.                                                                                                                   | Manual validation and verification                                                        |
| GREB            | GitHub           | Creative Commons Attribution 4.0 License | Yearly                        | 1700                                      | 1                                                               | Fortran 90 (GrADS or Python 3.7 for data processing)                                                                                                                                                                 | Fortran 90 code tested by gfortran on Mac and ifort on Linux under continuous integration |

Table S1. Continued.

| Model                       | Development home                         | License                             | Approximate release frequency                                                              | Codebase size (approximate lines of code) | Simulation years second (approximate for a single core machine) | Language, format and support platforms                                                                                                                                                                                                 | Code testing                                                        |
|-----------------------------|------------------------------------------|-------------------------------------|--------------------------------------------------------------------------------------------|-------------------------------------------|-----------------------------------------------------------------|----------------------------------------------------------------------------------------------------------------------------------------------------------------------------------------------------------------------------------------|---------------------------------------------------------------------|
| Hector                      |                                          | GNU GPLv3                           |                                                                                            |                                           |                                                                 | R and Python packages (with C++ backend). Linux, macOS and Windows.                                                                                                                                                                    | Unit tests and continuous integration                               |
| Held et al. two layer model | GitHub                                   | AGPLv3                              | Yearly                                                                                     | 500                                       | 5 000                                                           | Python 3.7 ( <a href="https://github.com/openclimatedata/openscm/blob/ar5ir-notebooks/notebooks/held_two_layer_remip.ipynb">https://github.com/openclimatedata/openscm/blob/ar5ir-notebooks/notebooks/held_two_layer_remip.ipynb</a> ) | Manual validation and verification                                  |
| MAGICC                      | Private repository                       | Custom Community commercial license | Decadal (internally approximately monthly, moving to approximately annual public releases) | 15 000                                    | 350                                                             | Fortran 90 (Open-source Python wrapper available). Linux, macOS and Windows.                                                                                                                                                           | Unit tests and continuous integration                               |
| MCE                         | Private GitHub, preparing public release | n/a                                 | n/a                                                                                        | 760 excluding calibration code            | 500                                                             | Python 2.7 and 3.7 on multiple platforms                                                                                                                                                                                               | Comparing results for idealized scenarios with analytical solutions |

Table S1. Continued.

| Model | Development<br>home                                                                                                                          | License                                       | Approximate<br>release fre-<br>quency | Codebase size<br>(approximate<br>lines of code) | Simulation<br>years per<br>second (ap-<br>proximate for<br>a single core<br>machine) | Language,<br>format and<br>platforms | Code testing                                                        |
|-------|----------------------------------------------------------------------------------------------------------------------------------------------|-----------------------------------------------|---------------------------------------|-------------------------------------------------|--------------------------------------------------------------------------------------|--------------------------------------|---------------------------------------------------------------------|
| OSCAR | Development<br>internal, with<br>release on<br>GitHub<br><a href="https://github.com/igasser/">https://github.<br/>com/igasser/</a><br>OSCAR | CeCILL                                        | sub-yearly                            | 5000 excluding<br>calibration<br>code           |                                                                                      | Python 3.7                           | Manual validation<br>and verification                               |
| WASP  | Internal                                                                                                                                     | Creative<br>Commons<br>Attribution<br>License |                                       | 100000                                          |                                                                                      | C++ 11                               | WASP C++ code<br>tested only on GNU<br>GCC compiler col-<br>lection |

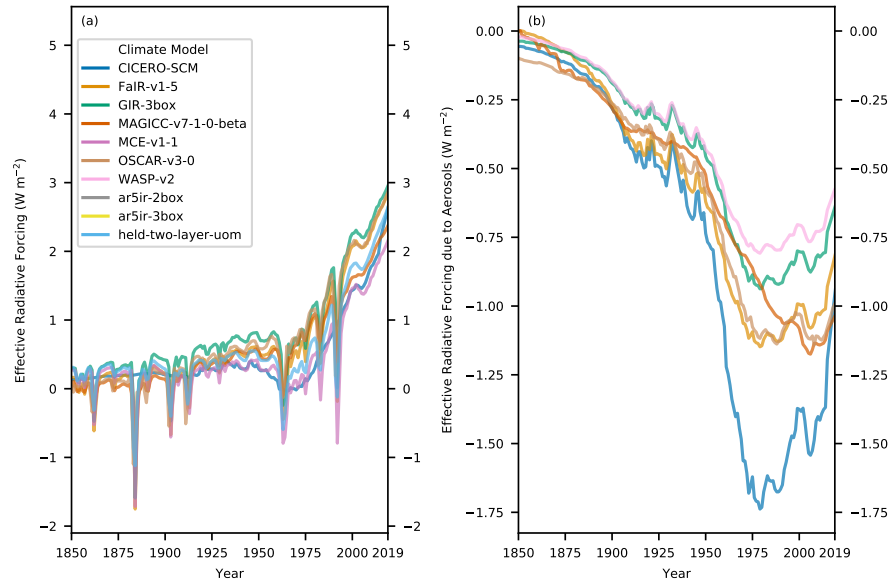

**Figure S1.** Historical effective radiative forcing for RCMIP models in illustrative configurations. In order to provide timeseries up until 2019, we have used data from the combination of historical and ssp585 simulations. (a) - total effective radiative forcing; (b) - aerosol effective radiative forcing.

**Table S2.** Emulation scores and equilibrium climate sensitivities (ECSs) for RCMP model calibrations. In parentheses we show the number of simulations available for each model variant.

| Target CMIP6 model         | RCMP model              | ECS (K) | RMSE (K) |
|----------------------------|-------------------------|---------|----------|
| AWI-CM-1-1-MR_r1i1p1f1 (5) | MAGICC-v7-1-0-beta (5)  | 3.22    | 0.16     |
| BCC-CSM2-MR_r1i1p1f1 (6)   | MCE-v1-1 (2)            | 2.90    | 0.21     |
|                            | MAGICC-v7-1-0-beta (6)  | 2.83    | 0.16     |
|                            | ar5ir-2box (2)          | 7.35    | 0.13     |
|                            | ar5ir-3box (2)          | 7.78    | 0.13     |
|                            | held-two-layer-uom (2)  | 2.63    | 0.13     |
| BCC-ESM1_r1i1p1f1 (4)      | MCE-v1-1 (2)            | 2.96    | 0.12     |
|                            | MAGICC-v7-1-0-beta (3)  | 3.13    | 0.13     |
|                            | ar5ir-2box (2)          | 15.30   | 0.18     |
|                            | ar5ir-3box (2)          | 8.06    | 0.15     |
|                            | held-two-layer-uom (2)  | 2.31    | 0.12     |
| CanESM5_r1i1p1f1 (10)      | MCE-v1-1 (2)            | 5.08    | 0.13     |
|                            | hectorl62381e71 (4)     | 4.79    | 0.42     |
|                            | MAGICC-v7-1-0-beta (10) | 5.72    | 0.30     |
|                            | ar5ir-2box (2)          | 5.24    | 0.19     |
|                            | ar5ir-3box (2)          | 11.82   | 0.21     |
|                            | held-two-layer-uom (2)  | 3.14    | 0.30     |
| CanESM5_r1i1p2f1 (7)       | MCE-v1-1 (2)            | 5.08    | 0.13     |
|                            | hectorl62381e71 (4)     | 4.79    | 0.43     |
|                            | MAGICC-v7-1-0-beta (7)  | 5.64    | 0.27     |
| CanESM5_r10i1p1f1 (5)      | hectorl62381e71 (2)     | 4.79    | 0.29     |
|                            | MAGICC-v7-1-0-beta (5)  | 6.01    | 0.18     |
| CESM2-WACCM_r1i1p1f1 (6)   | MCE-v1-1 (2)            | 3.85    | 0.15     |
|                            | hectorl62381e71 (3)     | 4.17    | 0.26     |
|                            | MAGICC-v7-1-0-beta (6)  | 4.26    | 0.21     |
|                            | ar5ir-2box (2)          | 4.64    | 0.45     |
|                            | ar5ir-3box (2)          | 13.42   | 0.21     |
|                            | held-two-layer-uom (2)  | 2.55    | 0.13     |

**Table S2.** Continued.

|                            |                        | <b>ECS (K)</b> | <b>RMSE (K)</b> |
|----------------------------|------------------------|----------------|-----------------|
| <b>Target CMIP6 model</b>  | <b>RCMIP model</b>     |                |                 |
| CESM2_rli1p1f1 (6)         | MCE-v1-1 (2)           | 4.20           | 0.17            |
|                            | hectorl62381e71 (3)    | 4.00           | 0.67            |
|                            | MAGICC-v7-1-0-beta (6) | 5.32           | 0.27            |
|                            | ar5ir-2box (2)         | 5.40           | 0.24            |
|                            | ar5ir-3box (2)         | 8.31           | 0.24            |
|                            | held-two-layer-uom (2) | 3.63           | 0.20            |
| CNRM-CM6-1_rli1p1f2 (8)    | MCE-v1-1 (4)           | 4.06           | 0.24            |
|                            | hectorl62381e71 (5)    | 3.86           | 0.36            |
|                            | MAGICC-v7-1-0-beta (8) | 4.08           | 0.18            |
|                            | ar5ir-2box (4)         | 8.13           | 0.43            |
|                            | ar5ir-3box (4)         | 9.12           | 0.43            |
|                            | held-two-layer-uom (4) | 2.91           | 0.16            |
| CNRM-ESM2-1_rli1p1f2 (10)  | MCE-v1-1 (2)           | 4.02           | 0.20            |
|                            | hectorl62381e71 (4)    | 3.51           | 0.25            |
|                            | MAGICC-v7-1-0-beta (9) | 3.71           | 0.18            |
|                            | ar5ir-2box (2)         | 8.22           | 0.27            |
|                            | ar5ir-3box (2)         | 12.18          | 0.27            |
|                            | held-two-layer-uom (2) | 2.29           | 0.17            |
| E3SM-1-0_rli1p1f1 (2)      | MCE-v1-1 (2)           | 5.10           | 0.17            |
|                            | MAGICC-v7-1-0-beta (2) | 5.69           | 0.22            |
| EC-Earth3-Veg_rli1p1f1 (7) | MCE-v1-1 (2)           | 4.13           | 0.19            |
|                            | MAGICC-v7-1-0-beta (7) | 4.47           | 0.25            |
|                            | ar5ir-2box (2)         | 15.91          | 0.27            |
|                            | ar5ir-3box (2)         | 8.32           | 0.22            |
|                            | held-two-layer-uom (2) | 3.50           | 0.19            |

**Table S2.** Continued.

|                            |                        | <b>ECS (K)</b> | <b>RMSE (K)</b> |
|----------------------------|------------------------|----------------|-----------------|
| <b>Target CMIP6 model</b>  | <b>RCMIP model</b>     |                |                 |
| FGOALS-g3_r1i1p1f1 (4)     | MAGICC-v7-1-0-beta (4) | 2.77           | 0.15            |
| GISS-E2-1-G_r1i1p1f1 (4)   | MCE-v1-1 (4)           | 2.69           | 0.16            |
|                            | MAGICC-v7-1-0-beta (4) | 2.81           | 0.19            |
|                            | ar5ir-2box (4)         | 5.24           | 0.15            |
|                            | ar5ir-3box (4)         | 18.98          | 0.58            |
|                            | held-two-layer-uom (4) | 2.50           | 0.15            |
| GISS-E2-1-H_r1i1p1f1 (3)   | MCE-v1-1 (3)           | 3.07           | 0.15            |
|                            | MAGICC-v7-1-0-beta (3) | 3.20           | 0.16            |
|                            | ar5ir-2box (3)         | 16.68          | 0.16            |
|                            | ar5ir-3box (3)         | 8.05           | 0.15            |
|                            | held-two-layer-uom (3) | 2.48           | 0.14            |
| GISS-E2-2-G_r1i1p1f1 (3)   | MAGICC-v7-1-0-beta (3) | 2.88           | 0.19            |
|                            | ar5ir-2box (3)         | 3.70           | 0.16            |
|                            | ar5ir-3box (3)         | 18.86          | 0.66            |
|                            | held-two-layer-uom (3) | 1.90           | 0.14            |
| IPSL-CM6A-LR_r1i1p1f1 (9)  | MCE-v1-1 (4)           | 3.83           | 0.25            |
|                            | hectorl62381e71 (6)    | 3.07           | 0.67            |
|                            | MAGICC-v7-1-0-beta (9) | 4.53           | 0.25            |
|                            | ar5ir-2box (4)         | 13.57          | 0.34            |
|                            | ar5ir-3box (4)         | 5.71           | 0.26            |
|                            | held-two-layer-uom (4) | 4.57           | 0.29            |
| IPSL-CM6A-LR_r1i1p1f2 (2)  | MAGICC-v7-1-0-beta (2) | 4.43           | 0.21            |
| IPSL-CM6A-LR_r10i1p1f1 (3) | MCE-v1-1 (1)           | 3.83           | 0.21            |
|                            | hectorl62381e71 (1)    | 3.07           | 0.40            |
|                            | MAGICC-v7-1-0-beta (3) | 3.77           | 0.32            |
| MCM-UA-1-0_r1i1p1f2 (4)    | MAGICC-v7-1-0-beta (4) | 3.45           | 0.16            |



**Table S2.** Continued.

|                            |                         | <b>ECS (K)</b> | <b>RMSE (K)</b> |
|----------------------------|-------------------------|----------------|-----------------|
| <b>Target CMIP6 model</b>  | <b>RCMIP model</b>      |                |                 |
| MIROC6_rli1p1f1 (14)       | MCE-v1-1 (4)            | 2.44           | 0.28            |
|                            | MAGICC-v7-1-0-beta (12) | 2.20           | 0.19            |
| MPI-ESM1-2-HR_rli1p1f1 (2) | MAGICC-v7-1-0-beta (2)  | 2.90           | 0.15            |
|                            | ar5ir-2box (2)          | 8.02           | 0.16            |
|                            | ar5ir-3box (2)          | 6.08           | 0.16            |
|                            | held-two-layer-uom (2)  | 2.17           | 0.12            |
| NorCPM1_rli1p1f1 (2)       | MAGICC-v7-1-0-beta (2)  | 2.73           | 0.29            |
|                            | ar5ir-2box (2)          | 7.24           | 0.13            |
|                            | ar5ir-3box (2)          | 8.60           | 0.23            |
|                            | held-two-layer-uom (2)  | 4.15           | 0.18            |
| NorESM2-LM_rli1p1f1 (3)    | MCE-v1-1 (2)            | 2.19           | 0.32            |
|                            | MAGICC-v7-1-0-beta (2)  | 2.27           | 0.22            |
|                            | ar5ir-2box (2)          | 13.37          | 0.19            |
|                            | ar5ir-3box (2)          | 12.48          | 0.19            |
| SAM0-UNICON_rli1p1f1 (2)   | MCE-v1-1 (2)            | 3.80           | 0.15            |
|                            | MAGICC-v7-1-0-beta (2)  | 3.42           | 0.24            |
| UKESM1-0-LL_rli1p1f2 (9)   | MCE-v1-1 (2)            | 5.31           | 0.16            |
|                            | MAGICC-v7-1-0-beta (9)  | 6.05           | 0.30            |
|                            | ar5ir-2box (2)          | 16.92          | 0.26            |
|                            | ar5ir-3box (2)          | 7.22           | 0.19            |
|                            | held-two-layer-uom (2)  | 4.11           | 0.19            |

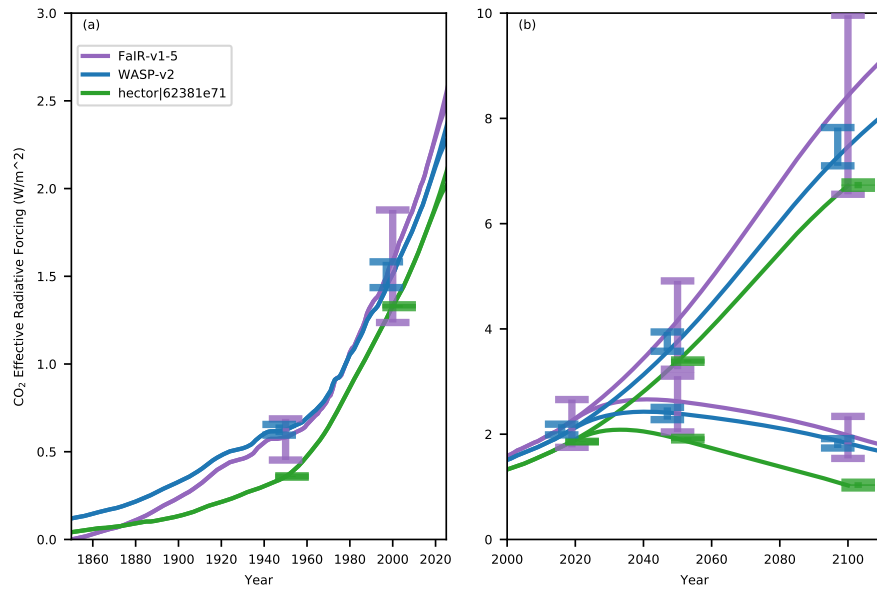

**Figure S2.** Probabilistic estimate of CO<sub>2</sub> effective radiative forcing for ssp119 and ssp585 (note, for Hector CO<sub>2</sub> radiative forcing is shown as effective radiative forcing is not available). (a) - historical period (1850-2025); (b) - projections (2000-2110).

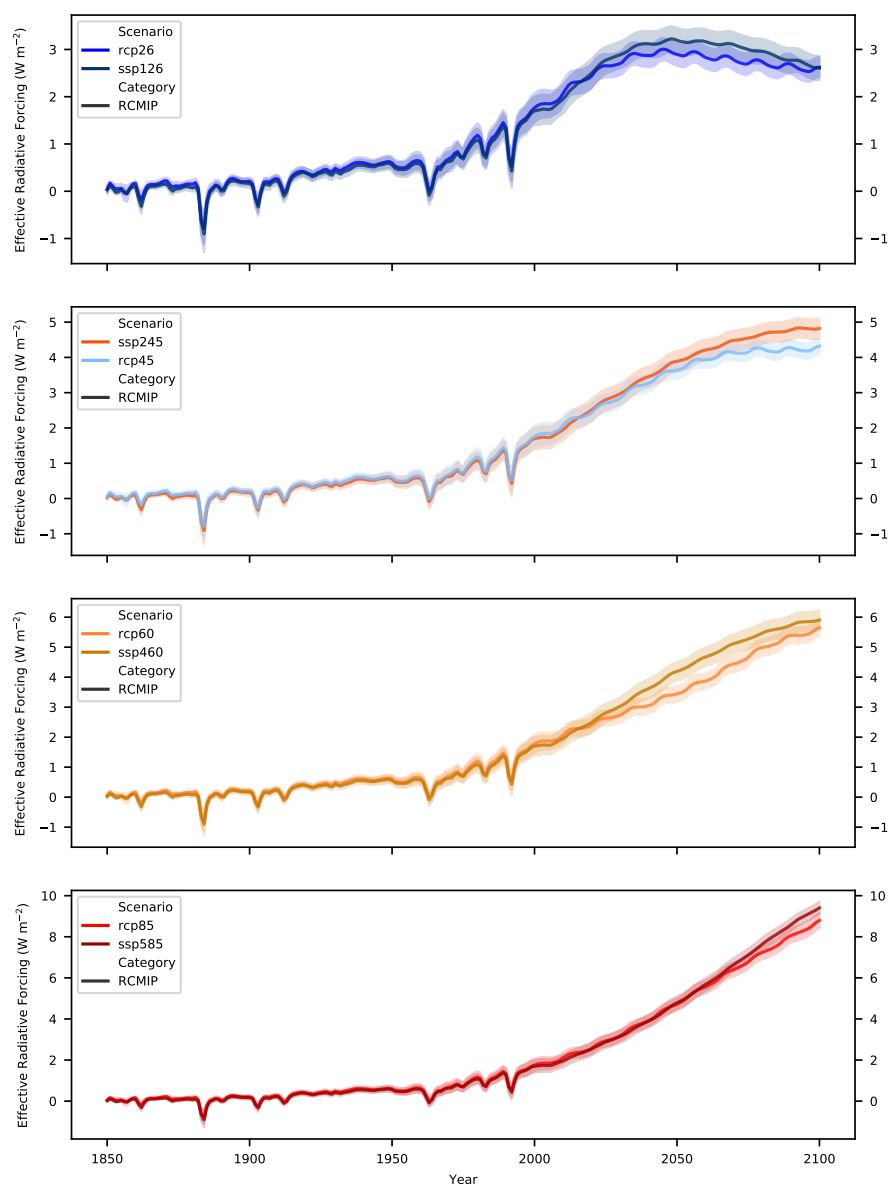

**Figure S3.** Comparison of effective radiative forcing projections under the RCPs and SSPs up until 2100. The coloured solid lines are RCMIP output where the RCP/SSP pair has been run with the same model in the same configuration. The plumes show the standard deviation of the available model results whilst the lines show the mean.

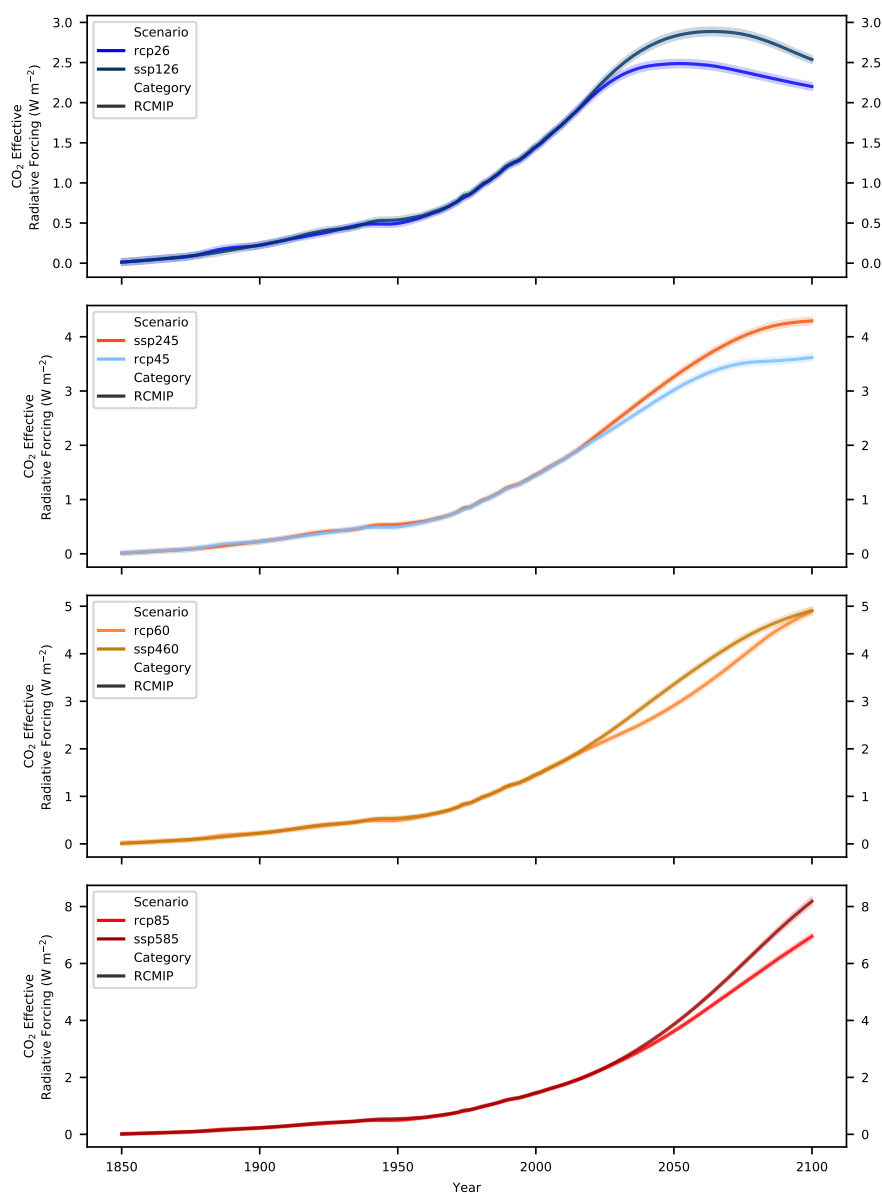

**Figure S4.** Comparison of CO<sub>2</sub> effective radiative forcing projections under the RCPs and SSPs up until 2100. The coloured solid lines are RCMIP output where the RCP/SSP pair has been run with the same model in the same configuration. The plumes show the standard deviation of the available model results whilst the lines show the mean.

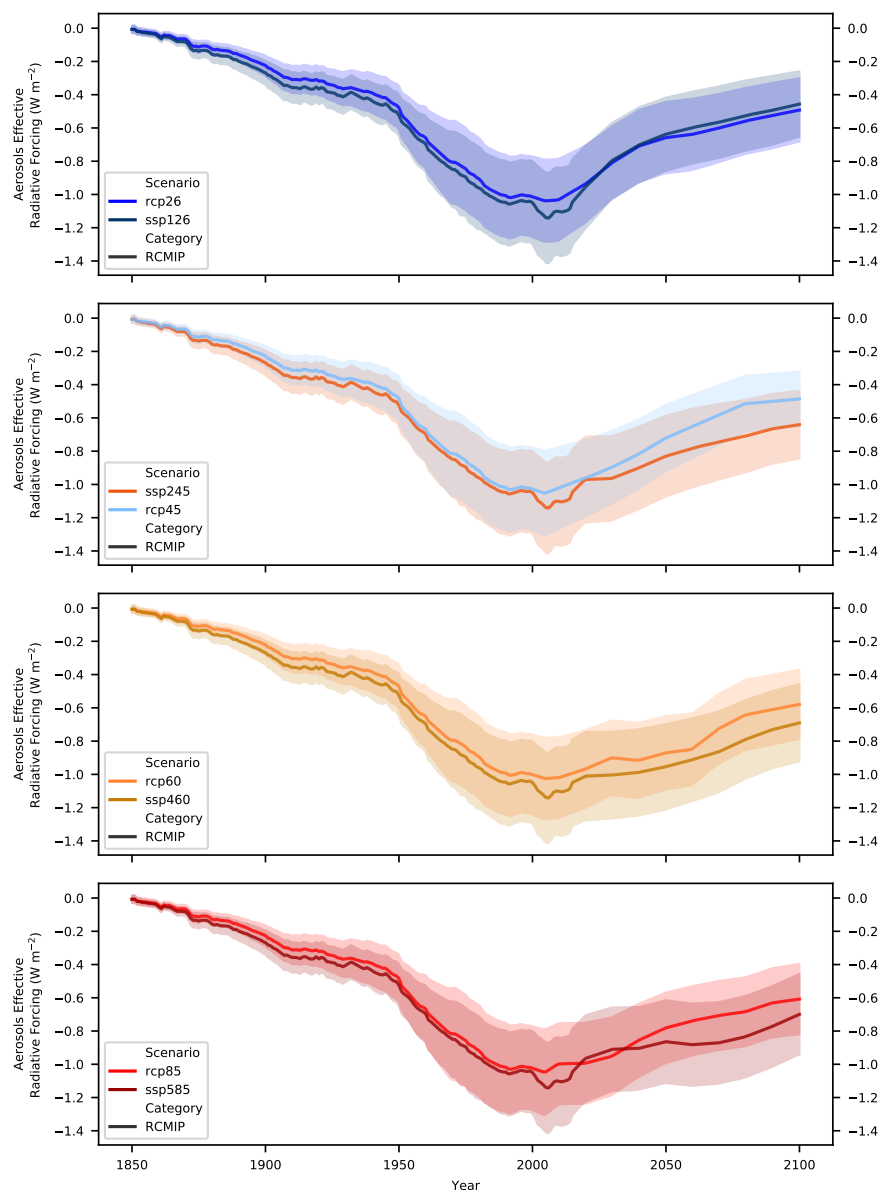

**Figure S5.** Comparison of aerosols effective radiative forcing projections under the RCPs and SSPs up until 2100. The coloured solid lines are RCMIP output where the RCP/SSP pair has been run with the same model in the same configuration. The plumes show the standard deviation of the available model results whilst the lines show the mean.

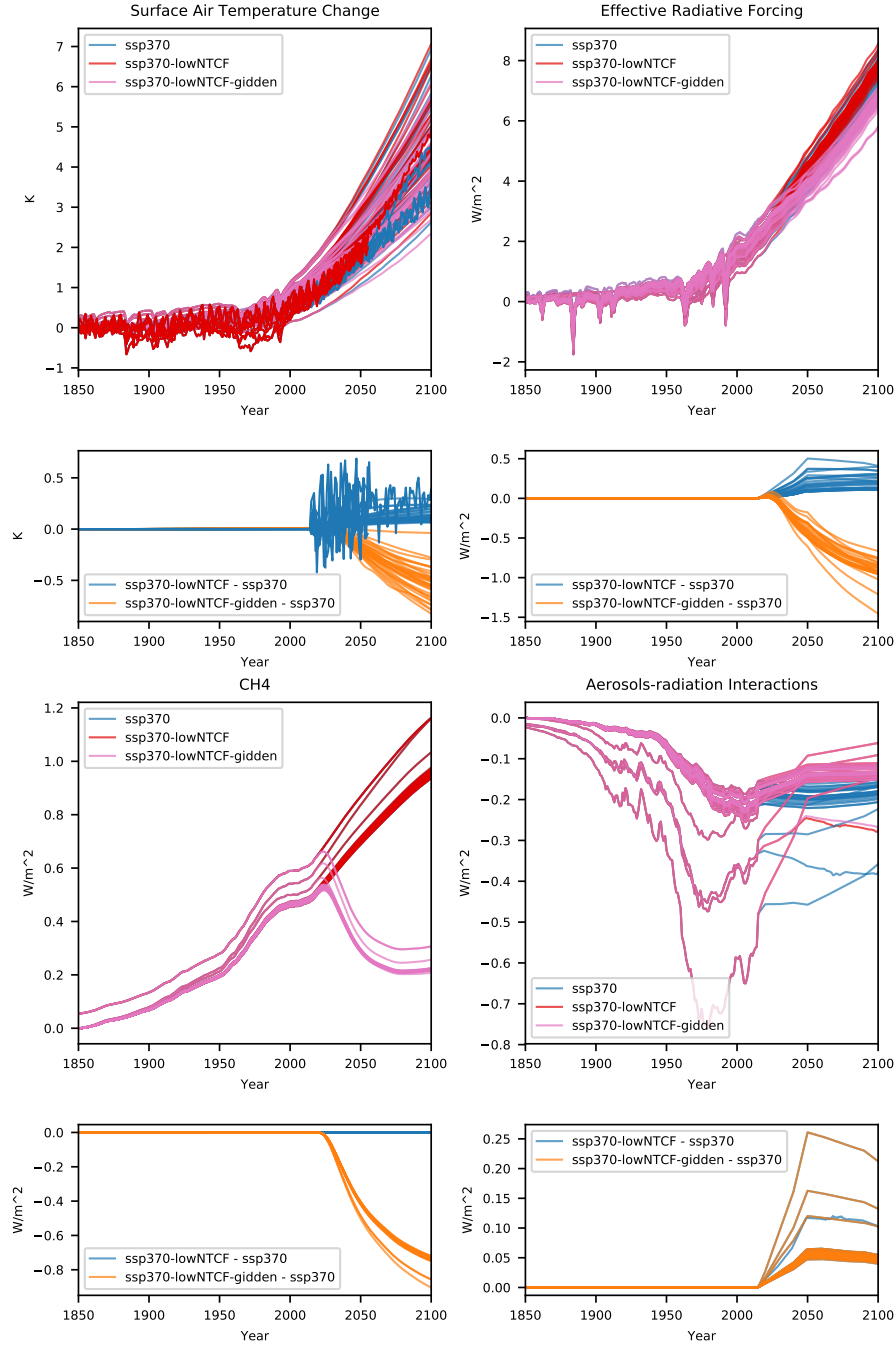

**Figure S6.** Response of RCMIP models to a reduction in near-term climate forcers. Results are from RCMIP models, except for temperature lines with natural variability which are CMIP6 results. The ssp370-lowNTCF scenario results in a small warming signal relative to ssp370, the magnitude of which varies by RCM. For comparison, we also include ssp370-lowNTCF as quantified by Gidden et al. (2019) (labelled ‘ssp370-lowntcf-gidden’). This implementation also includes reductions in methane and so a strong cooling signal is seen instead.

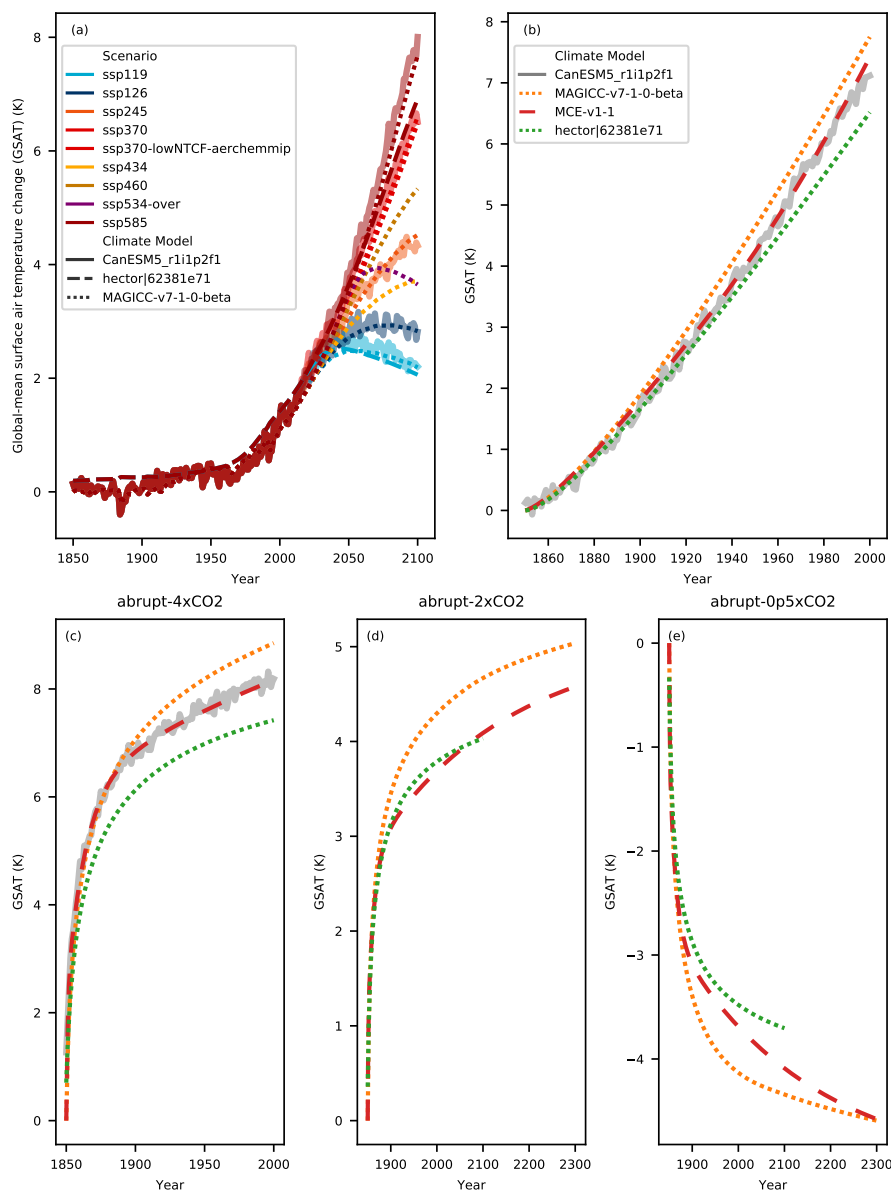

**Figure S7.** Emulation of CanESM5\_r1i1p2f1 by RCMs in RCMIP Phase 1. The thick transparent lines are the target CMIP6 model output (here from CanESM5\_r1i1p2f1). The thin lines are emulations from different RCMs. Panel (a) shows results for scenario based experiments while panels (b) - (e) show results for idealised CO2-only experiments (note that panels (b) - (e) share the same legend).

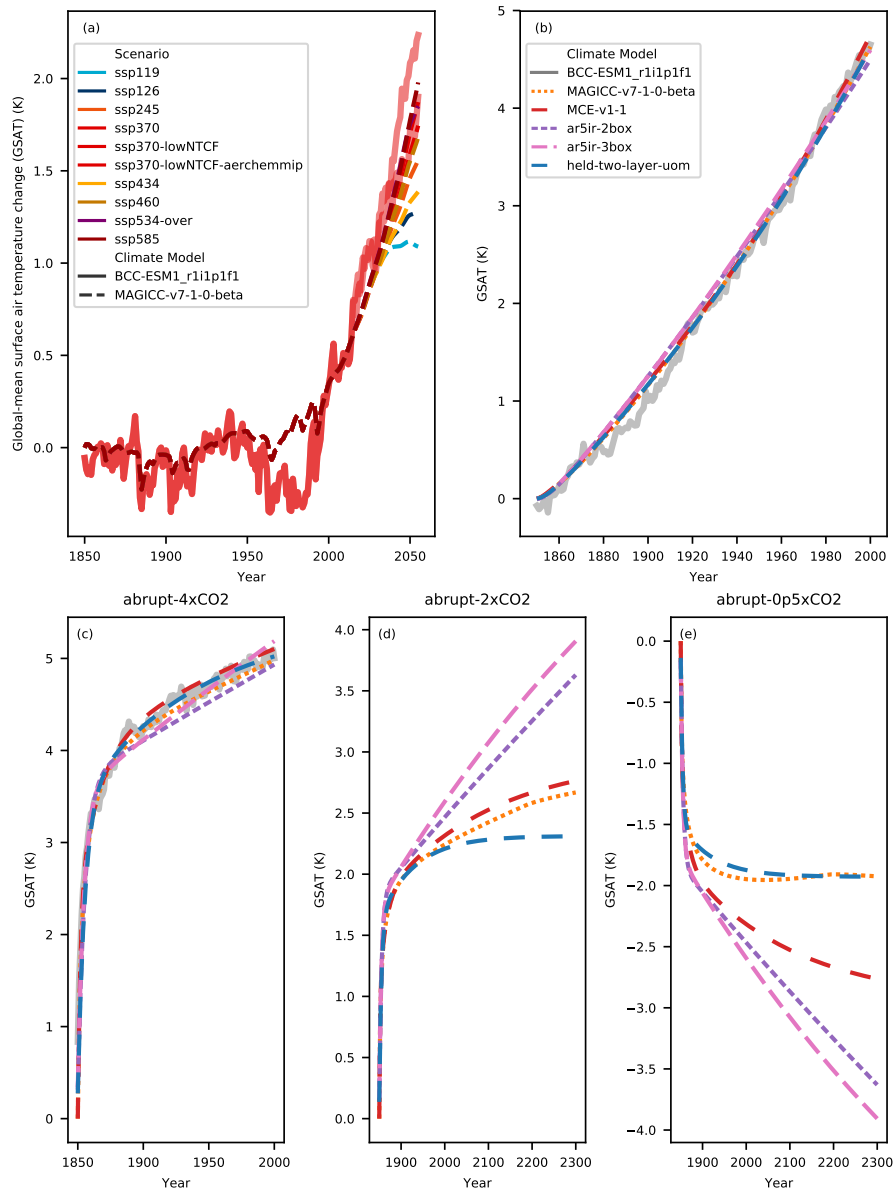

**Figure S8.** Emulation of BCC-ESM1\_r1i1p1f1 by RCMs in RCMIP Phase 1. The thick transparent lines are the target CMIP6 model output (here from BCC-ESM1\_r1i1p1f1). The thin lines are emulations from different RCMs. Panel (a) shows results for scenario based experiments while panels (b) - (e) show results for idealised CO2-only experiments (note that panels (b) - (e) share the same legend).



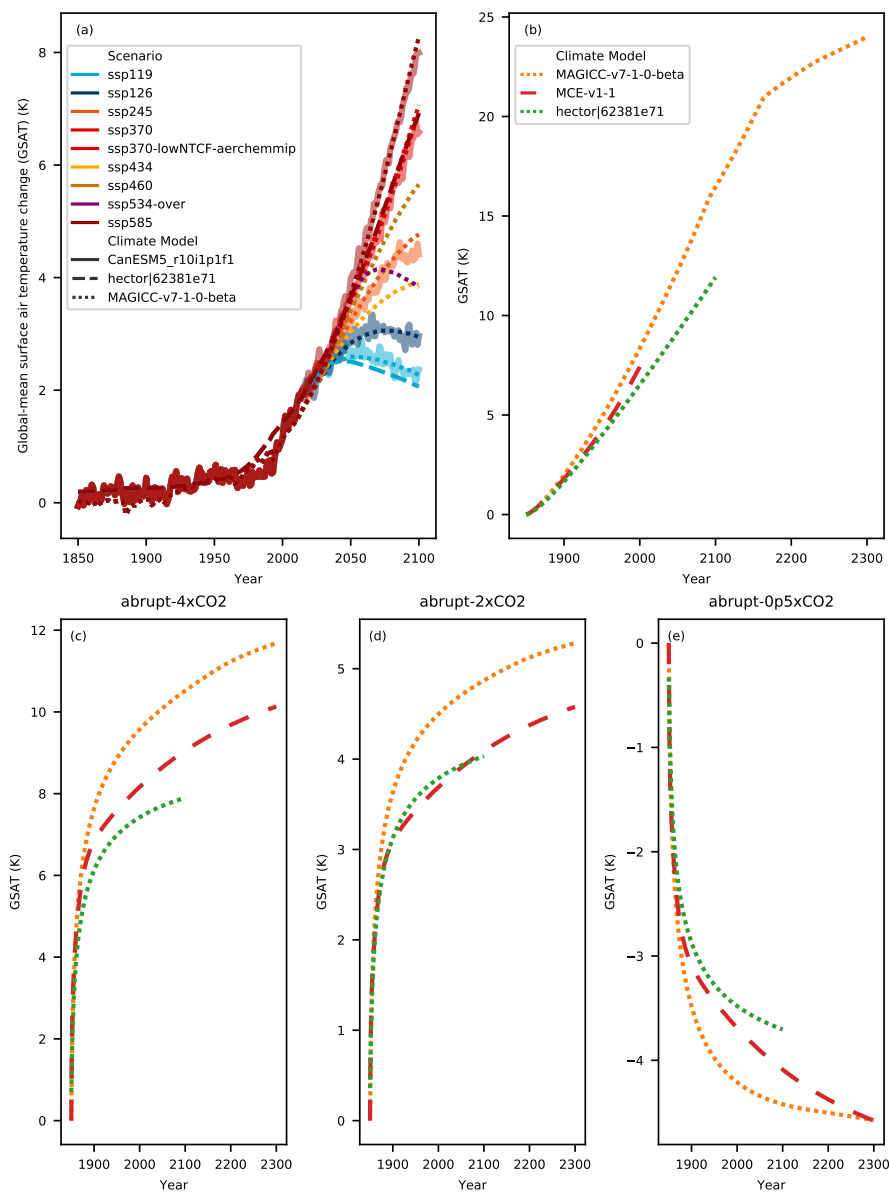

**Figure S9.** Emulation of CanESM5\_r10i1p1f1 by RCMs in RCMIP Phase 1. The thick transparent lines are the target CMIP6 model output (here from CanESM5\_r10i1p1f1). The thin lines are emulations from different RCMs. Panel (a) shows results for scenario based experiments while panels (b) - (e) show results for idealised CO2-only experiments (note that panels (b) - (e) share the same legend).

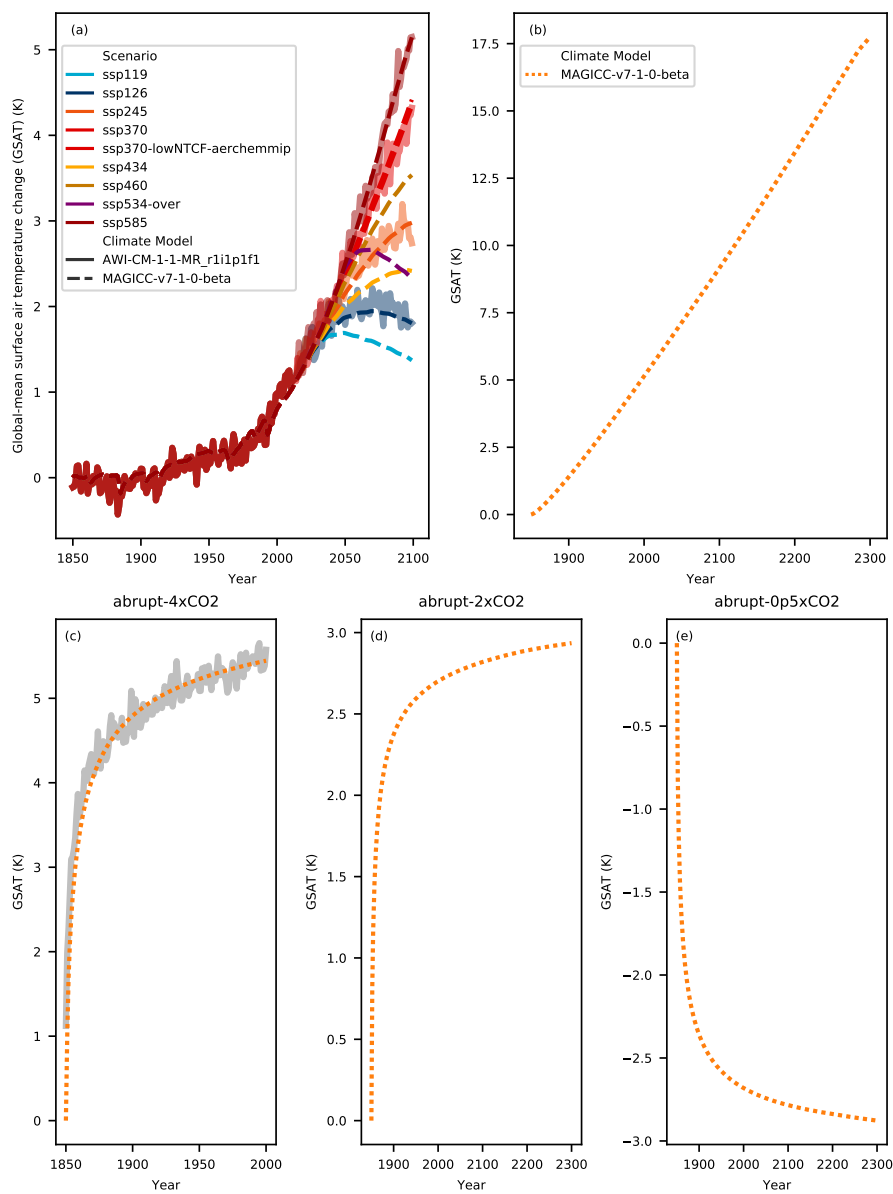

**Figure S10.** Emulation of generic by RCMs in RCMIP Phase 1. The thick transparent lines are the target CMIP6 model output (here from generic). The thin lines are emulations from different RCMs. Panel (a) shows results for scenario based experiments while panels (b) - (e) show results for idealised CO<sub>2</sub>-only experiments (note that panels (b) - (e) share the same legend).

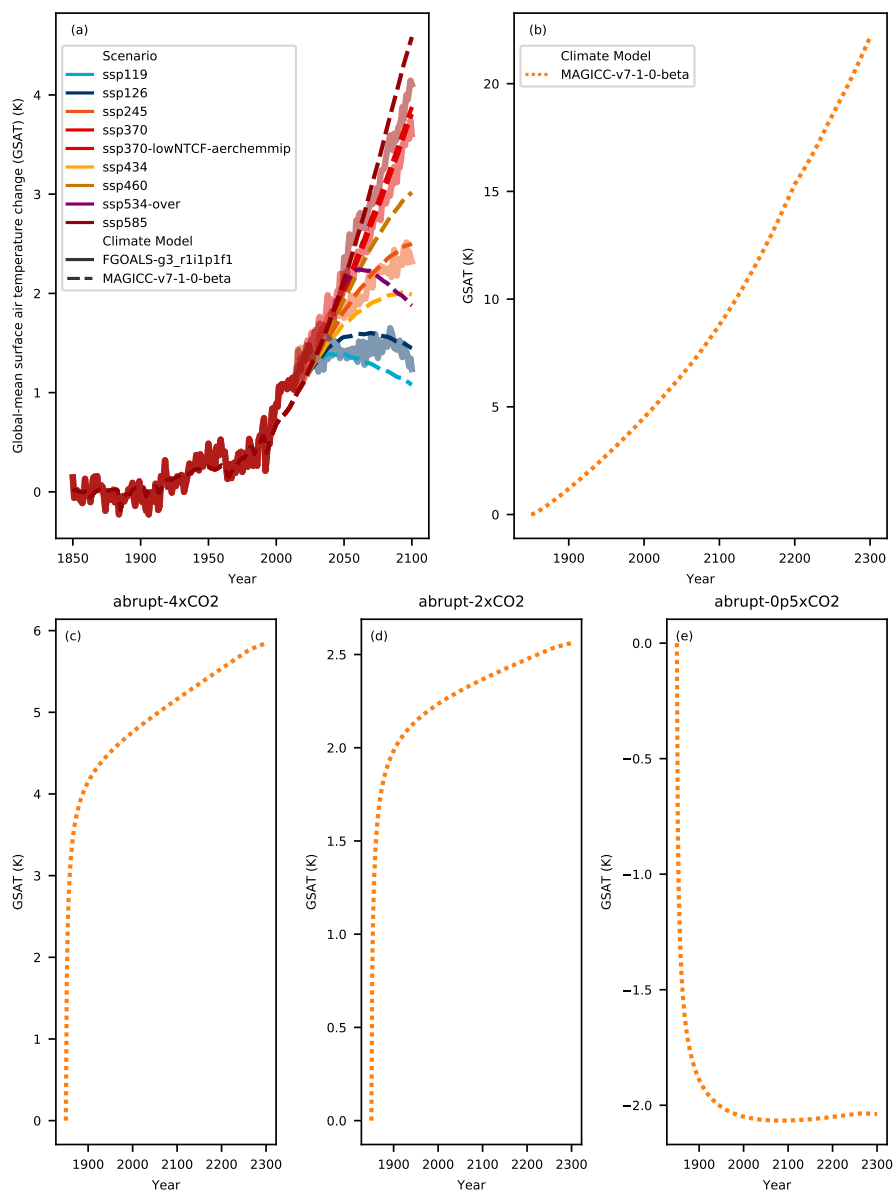

**Figure S11.** Emulation of FGOALS-g3\_r1i1p1f1 by RCMs in RCMIP Phase 1. The thick transparent lines are the target CMIP6 model output (here from FGOALS-g3\_r1i1p1f1). The thin lines are emulations from different RCMs. Panel (a) shows results for scenario based experiments while panels (b) - (e) show results for idealised CO<sub>2</sub>-only experiments (note that panels (b) - (e) share the same legend).

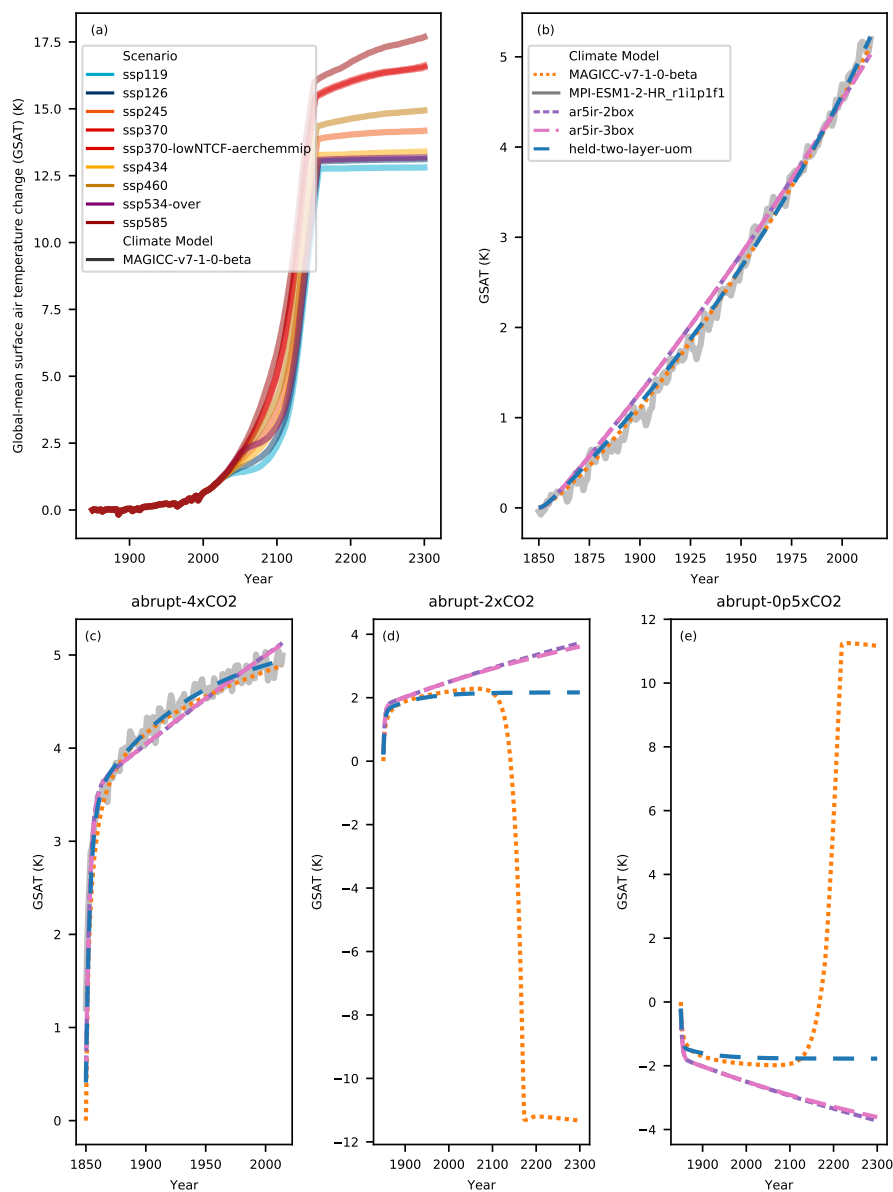

**Figure S12.** Emulation of MPI-ESM1-2-HR\_r1i1p1f1 by RCMs in RCMIP Phase 1. The thick transparent lines are the target CMIP6 model output (here from MPI-ESM1-2-HR\_r1i1p1f1). The thin lines are emulations from different RCMs. Panel (a) shows results for scenario based experiments while panels (b) - (e) show results for idealised CO<sub>2</sub>-only experiments (note that panels (b) - (e) share the same legend).

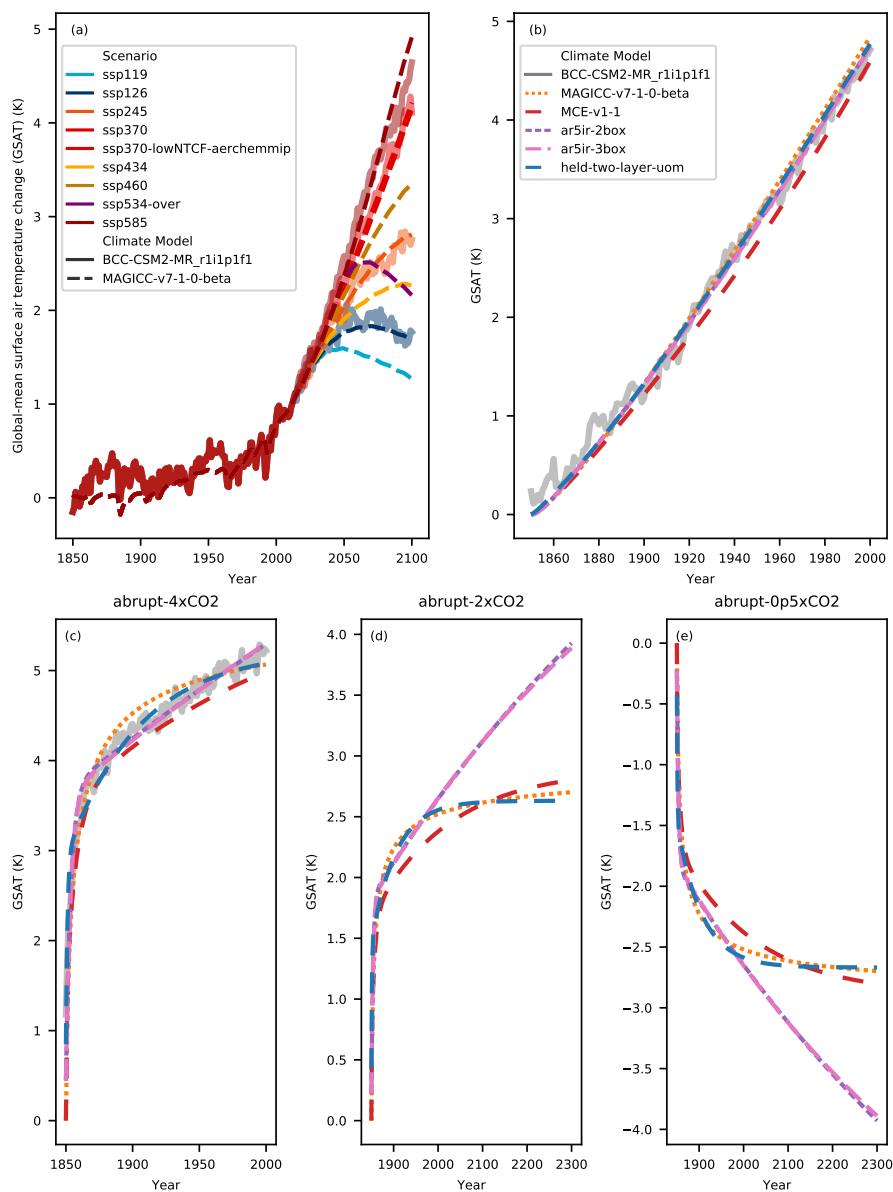

**Figure S13.** Emulation of BCC-CSM2-MR\_r1i1p1f1 by RCMs in RCMIP Phase 1. The thick transparent lines are the target CMIP6 model output (here from BCC-CSM2-MR\_r1i1p1f1). The thin lines are emulations from different RCMs. Panel (a) shows results for scenario based experiments while panels (b) - (e) show results for idealised CO2-only experiments (note that panels (b) - (e) share the same legend).

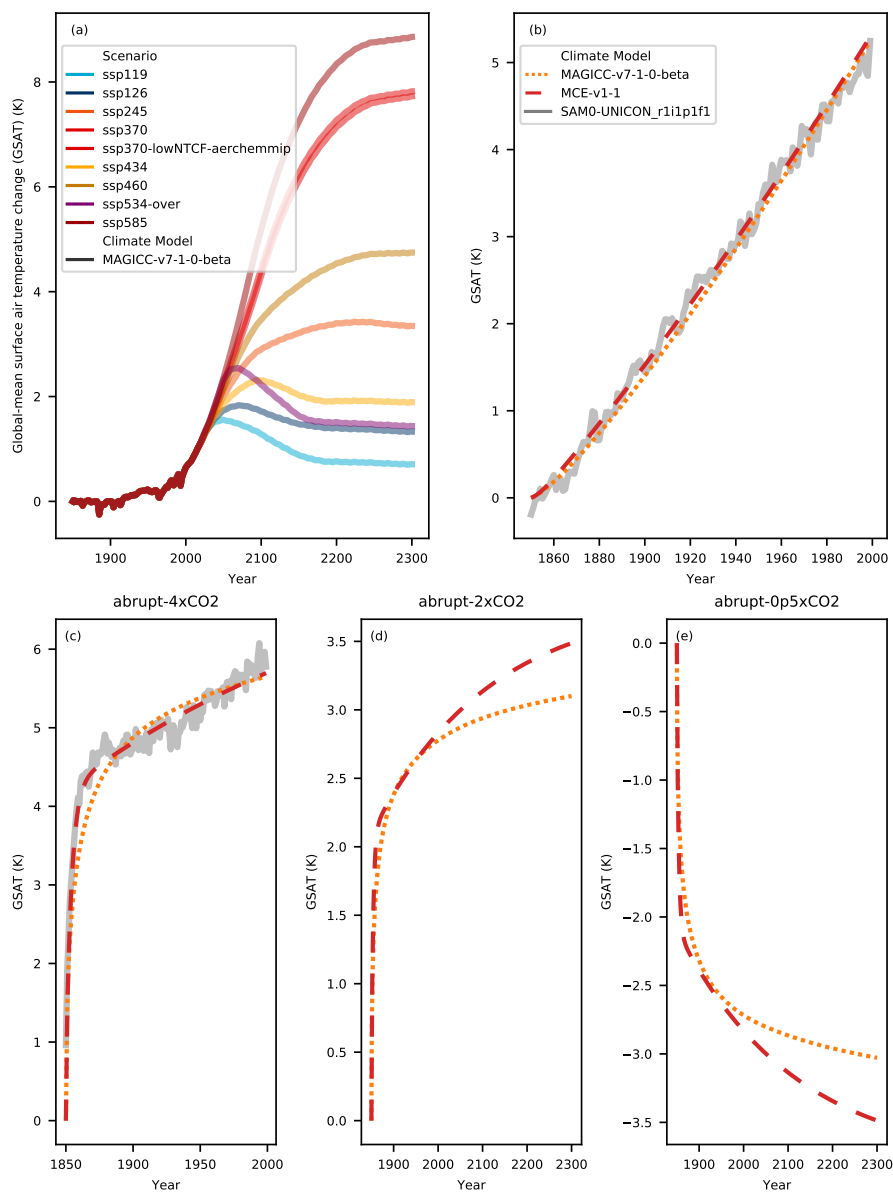

**Figure S14.** Emulation of SAM0-UNICON\_r1i1p1f1 by RCMs in RCMIP Phase 1. The thick transparent lines are the target CMIP6 model output (here from SAM0-UNICON\_r1i1p1f1). The thin lines are emulations from different RCMs. Panel (a) shows results for scenario based experiments while panels (b) - (e) show results for idealised CO2-only experiments (note that panels (b) - (e) share the same legend).

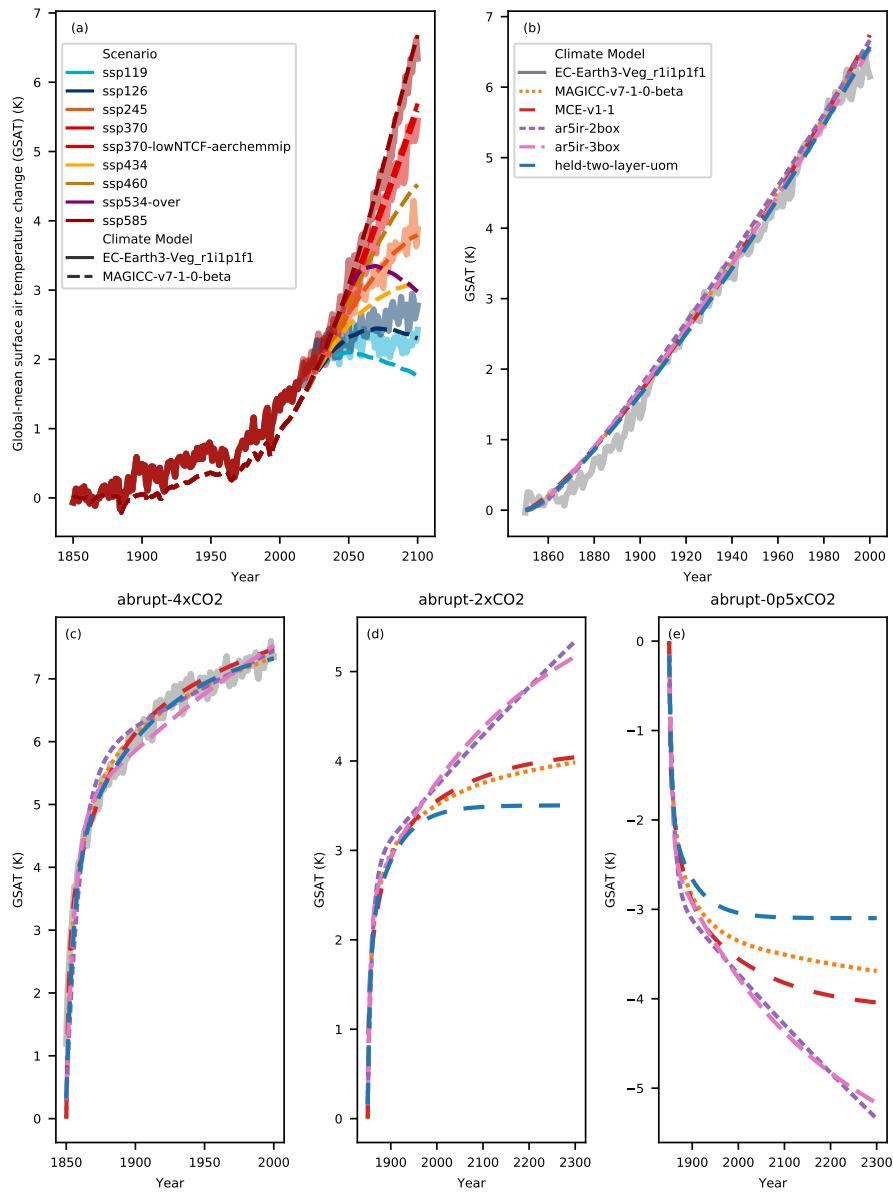

**Figure S15.** Emulation of EC-Earth3-Veg\_r1i1p1f1 by RCMs in RCMIP Phase 1. The thick transparent lines are the target CMIP6 model output (here from EC-Earth3-Veg\_r1i1p1f1). The thin lines are emulations from different RCMs. Panel (a) shows results for scenario based experiments while panels (b) - (e) show results for idealised CO2-only experiments (note that panels (b) - (e) share the same legend).

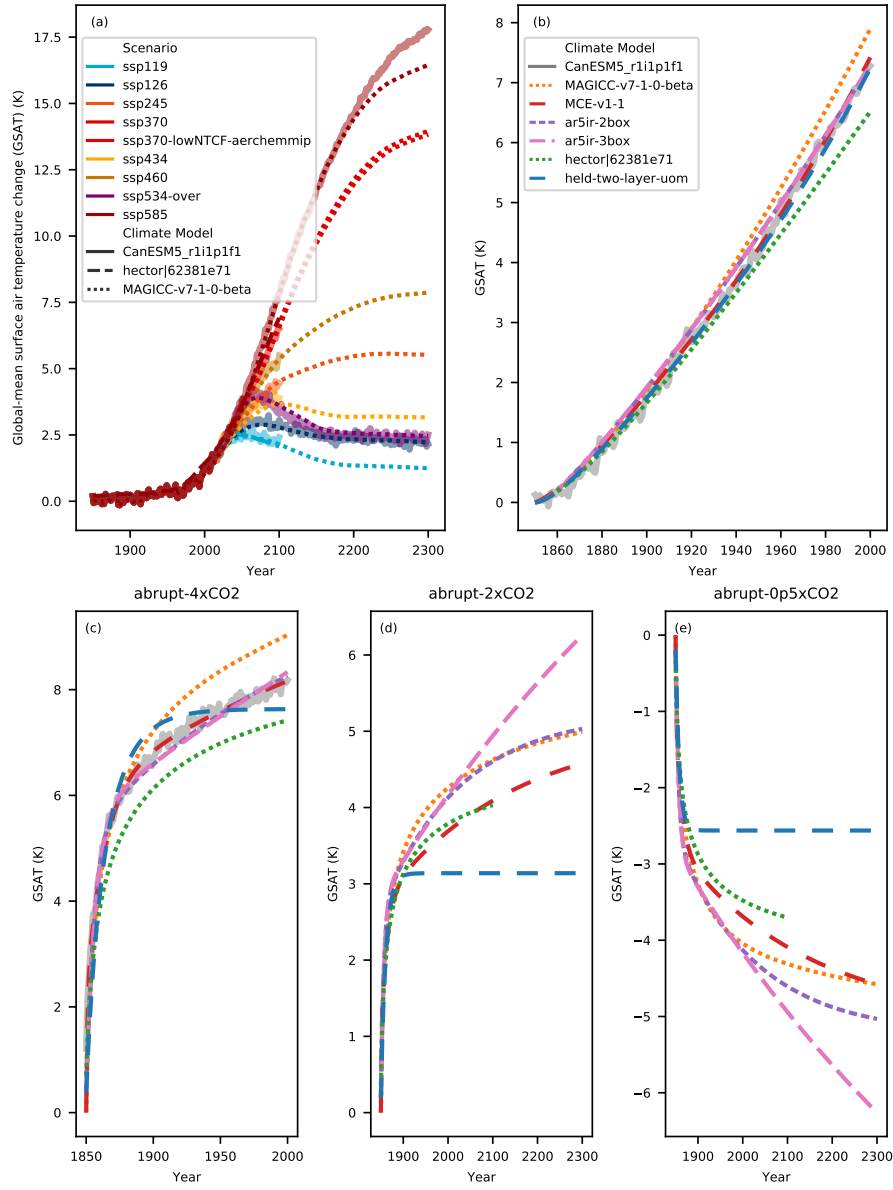

**Figure S16.** Emulation of CanESM5\_r1i1p1f1 by RCMs in RCMIP Phase 1. The thick transparent lines are the target CMIP6 model output (here from CanESM5\_r1i1p1f1). The thin lines are emulations from different RCMs. Panel (a) shows results for scenario based experiments while panels (b) - (e) show results for idealised CO2-only experiments (note that panels (b) - (e) share the same legend).



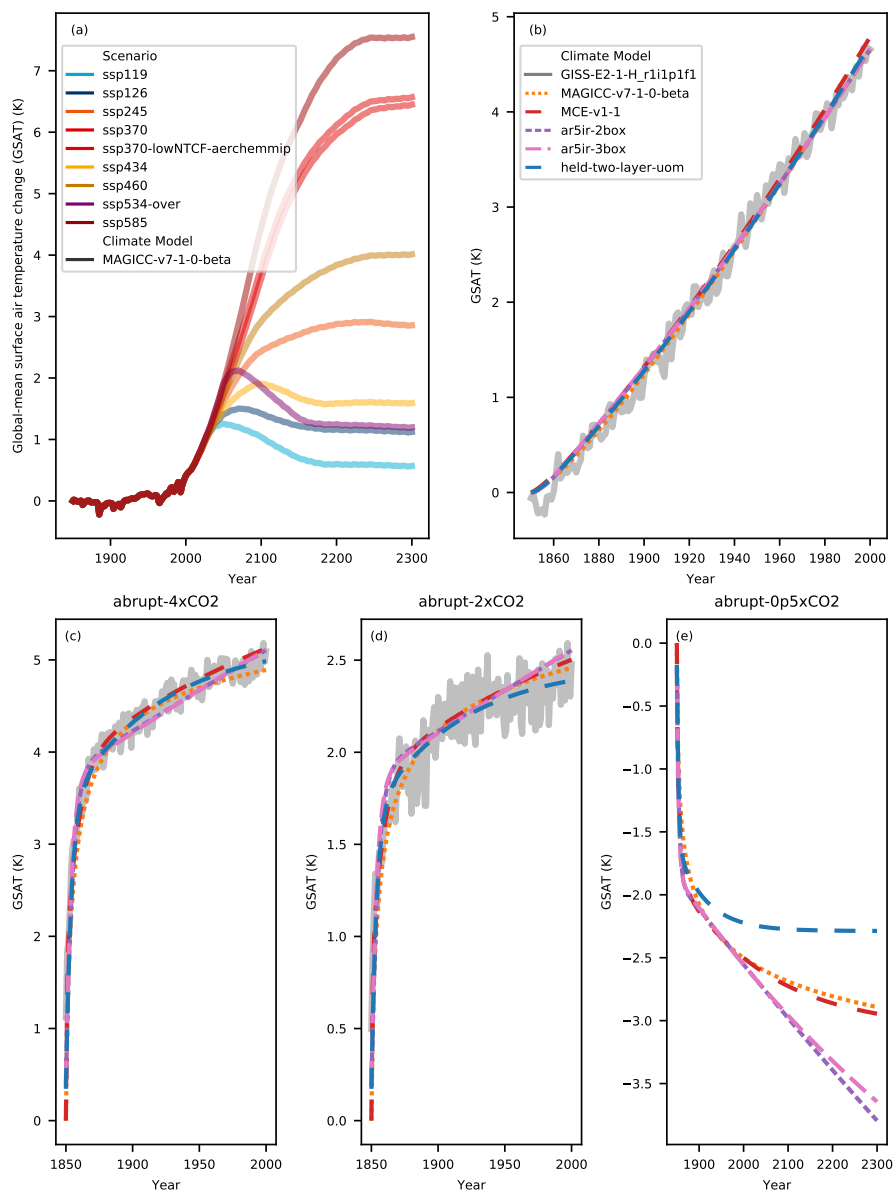

**Figure S17.** Emulation of GISS-E2-1-H\_r1i1p1f1 by RCMs in RCMIP Phase 1. The thick transparent lines are the target CMIP6 model output (here from GISS-E2-1-H\_r1i1p1f1). The thin lines are emulations from different RCMs. Panel (a) shows results for scenario based experiments while panels (b) - (e) show results for idealised CO2-only experiments (note that panels (b) - (e) share the same legend).

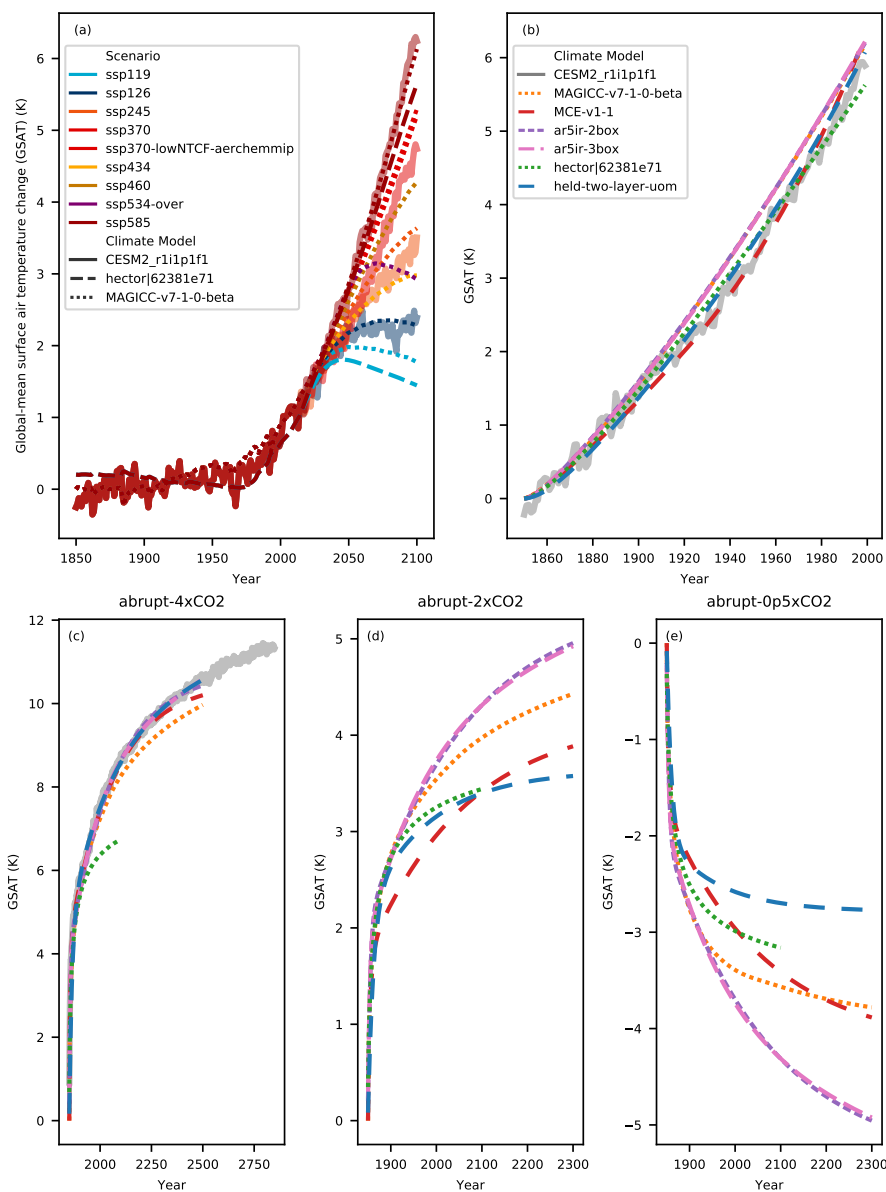

**Figure S18.** Emulation of CESM2\_r1i1p1f1 by RCMs in RCMIP Phase 1. The thick transparent lines are the target CMIP6 model output (here from CESM2\_r1i1p1f1). The thin lines are emulations from different RCMs. Panel (a) shows results for scenario based experiments while panels (b) - (e) show results for idealised CO<sub>2</sub>-only experiments (note that panels (b) - (e) share the same legend).

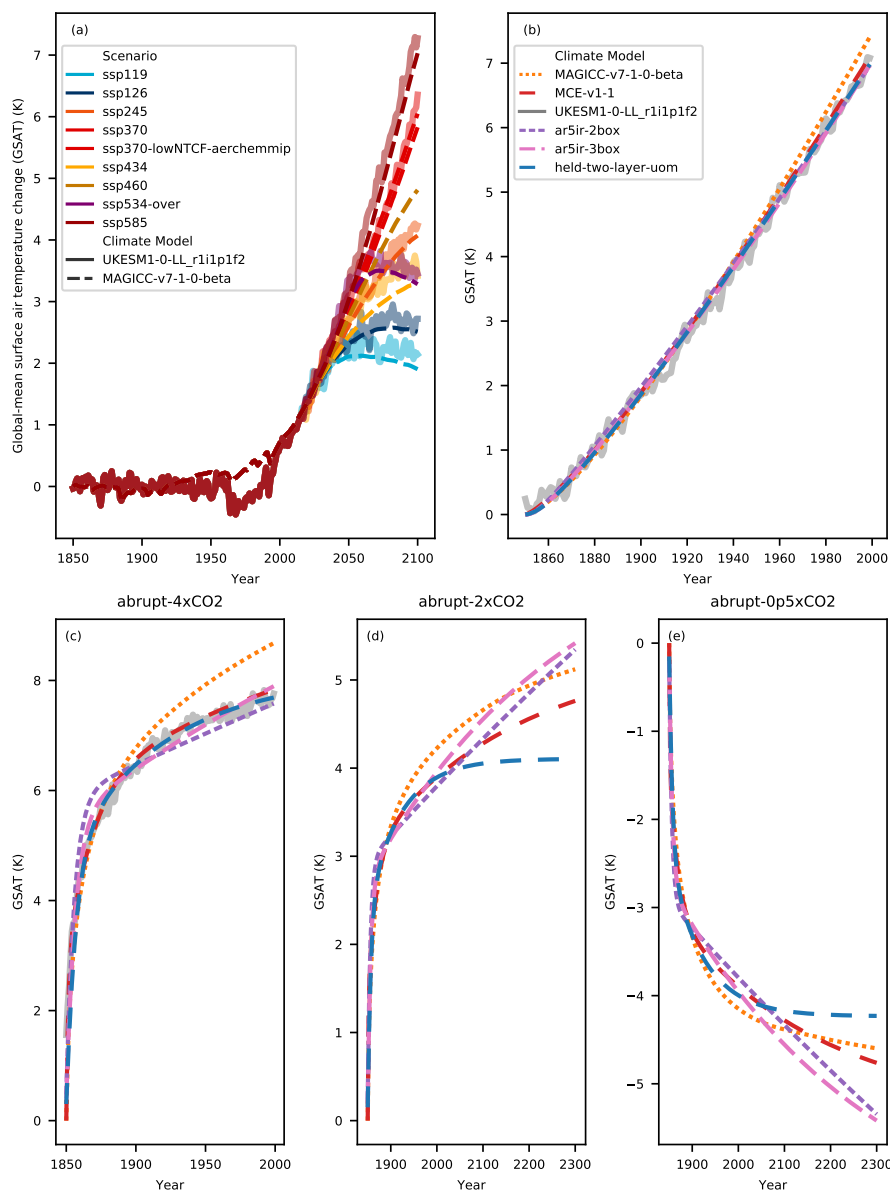

**Figure S19.** Emulation of UKESM1-0-LL\_r1i1p1f2 by RCMs in RCMIP Phase 1. The thick transparent lines are the target CMIP6 model output (here from UKESM1-0-LL\_r1i1p1f2). The thin lines are emulations from different RCMs. Panel (a) shows results for scenario based experiments while panels (b) - (e) show results for idealised CO2-only experiments (note that panels (b) - (e) share the same legend).

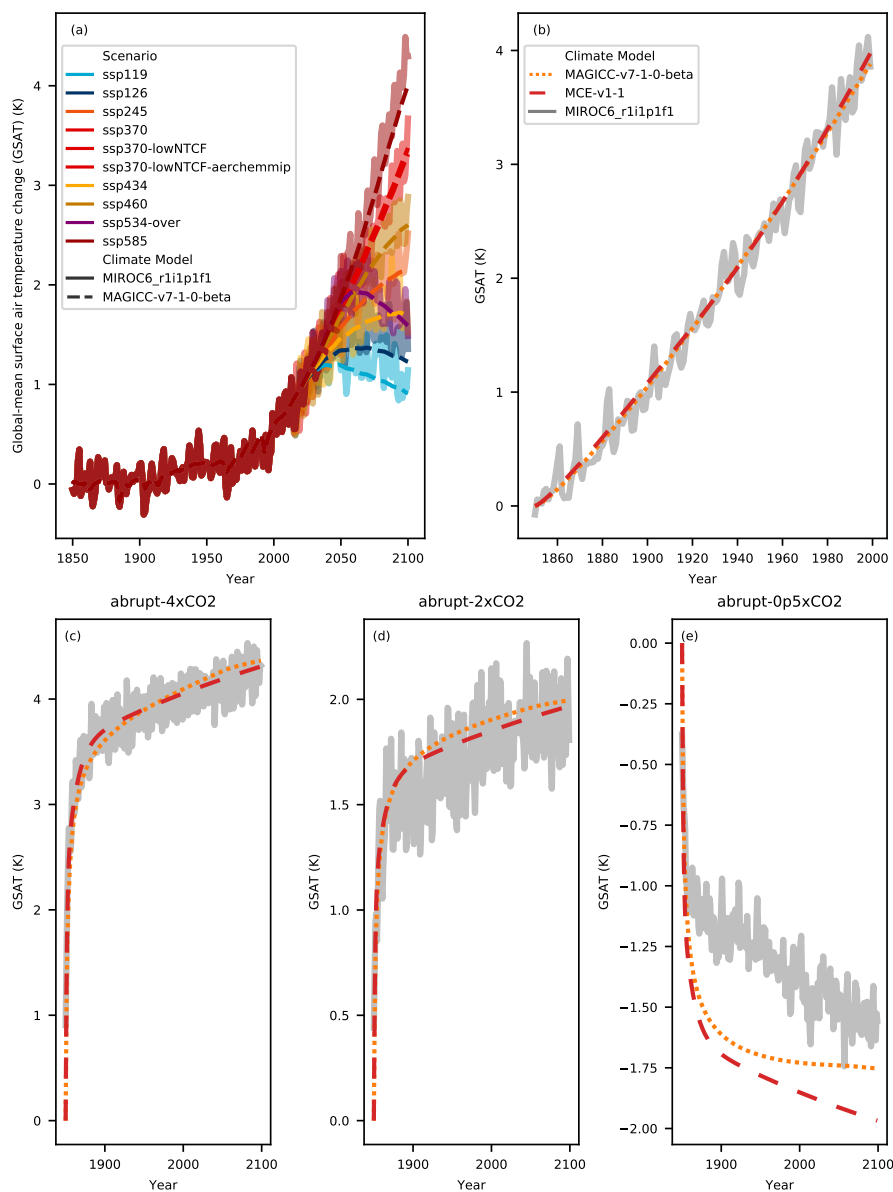

**Figure S20.** Emulation of MIROC6\_r1i1p1f1 by RCMs in RCMIP Phase 1. The thick transparent lines are the target CMIP6 model output (here from MIROC6\_r1i1p1f1). The thin lines are emulations from different RCMs. Panel (a) shows results for scenario based experiments while panels (b) - (e) show results for idealised CO2-only experiments (note that panels (b) - (e) share the same legend).

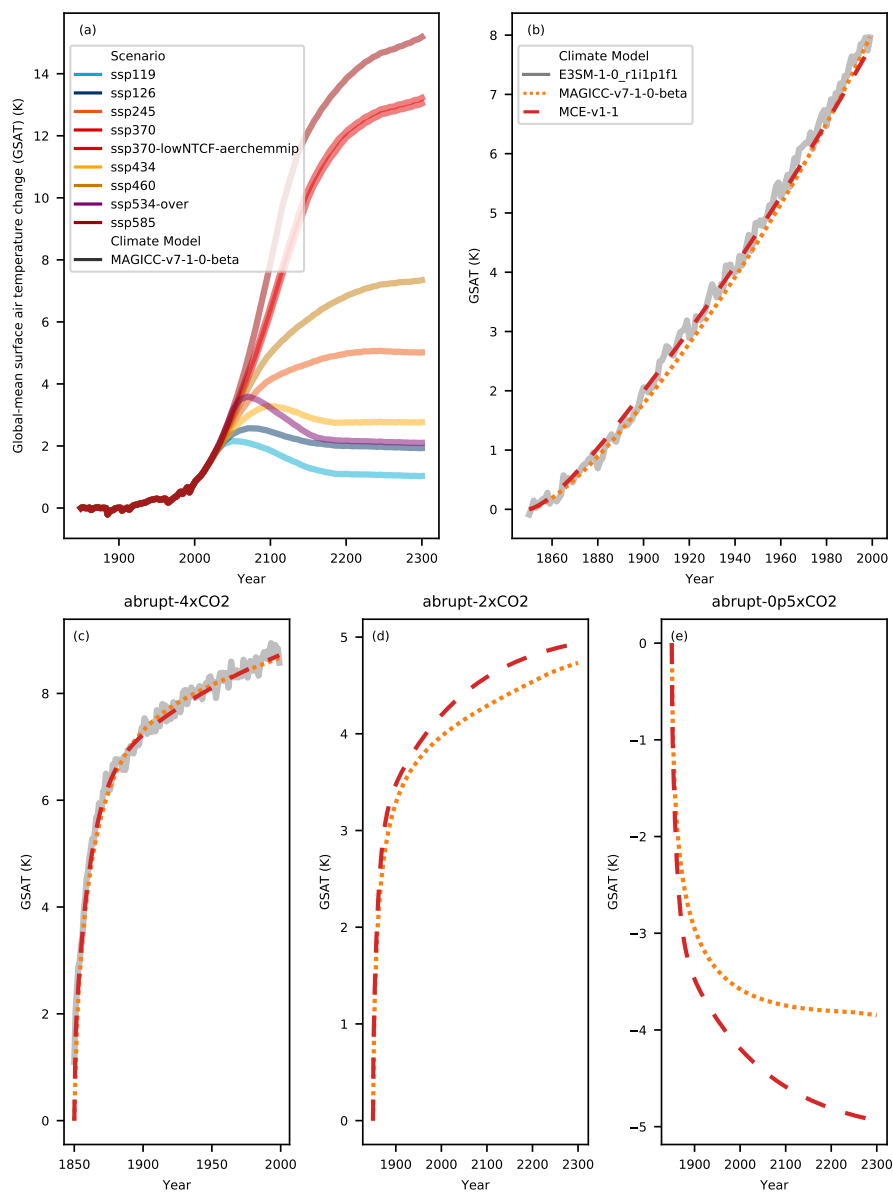

**Figure S21.** Emulation of E3SM-1-0\_r1i1p1f1 by RCMs in RCMIP Phase 1. The thick transparent lines are the target CMIP6 model output (here from E3SM-1-0\_r1i1p1f1). The thin lines are emulations from different RCMs. Panel (a) shows results for scenario based experiments while panels (b) - (e) show results for idealised CO<sub>2</sub>-only experiments (note that panels (b) - (e) share the same legend).

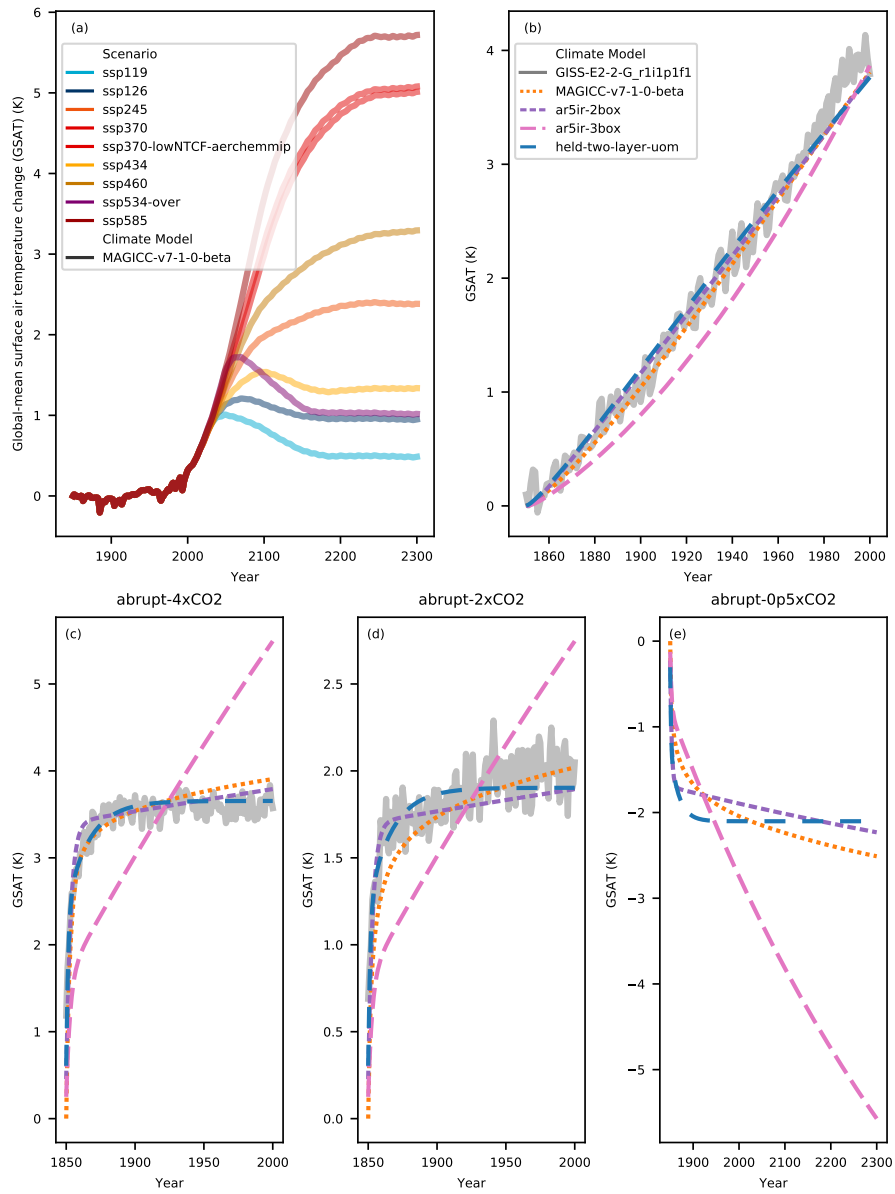

**Figure S22.** Emulation of GISS-E2-2-G\_r1i1p1f1 by RCMs in RCMIP Phase 1. The thick transparent lines are the target CMIP6 model output (here from GISS-E2-2-G\_r1i1p1f1). The thin lines are emulations from different RCMs. Panel (a) shows results for scenario based experiments while panels (b) - (e) show results for idealised CO2-only experiments (note that panels (b) - (e) share the same legend).

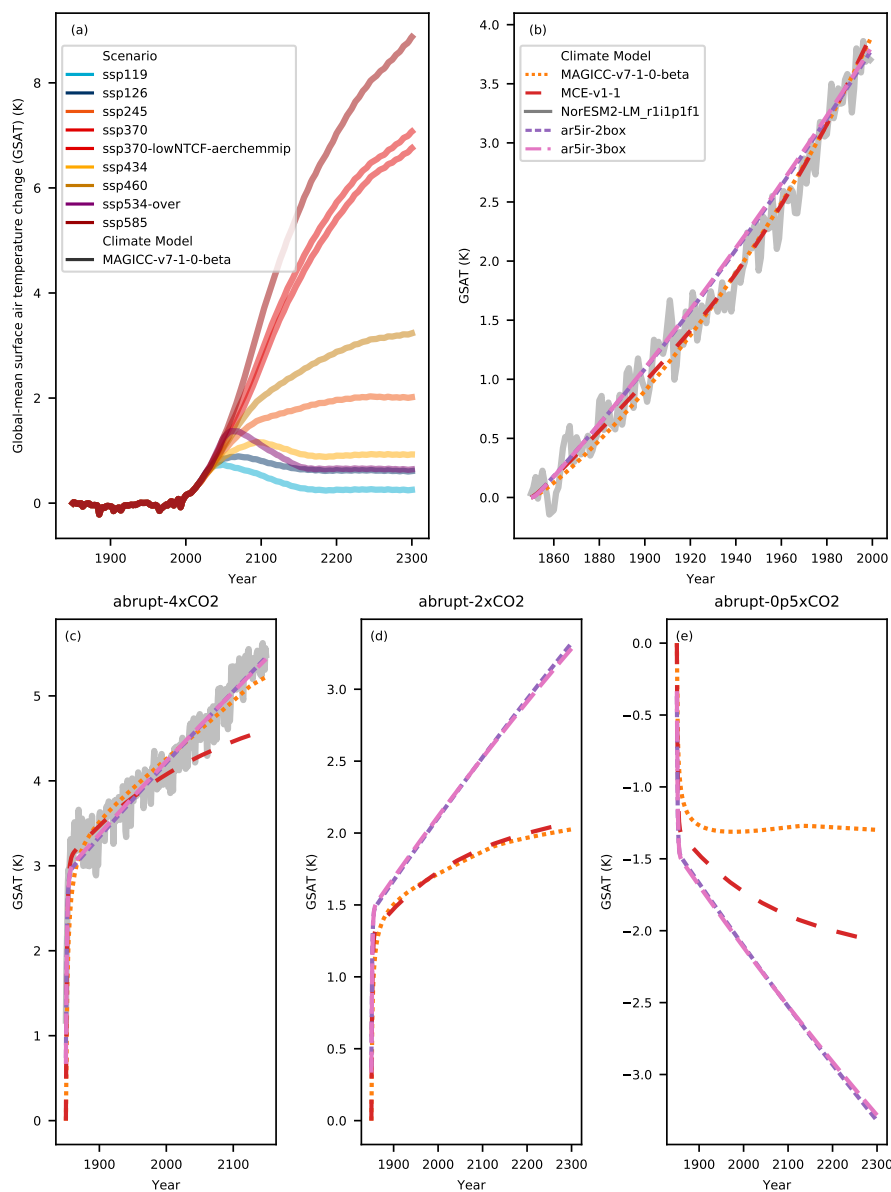

**Figure S23.** Emulation of NorESM2-LM\_r1i1p1f1 by RCMs in RCMIP Phase 1. The thick transparent lines are the target CMIP6 model output (here from NorESM2-LM\_r1i1p1f1). The thin lines are emulations from different RCMs. Panel (a) shows results for scenario based experiments while panels (b) - (e) show results for idealised CO2-only experiments (note that panels (b) - (e) share the same legend).

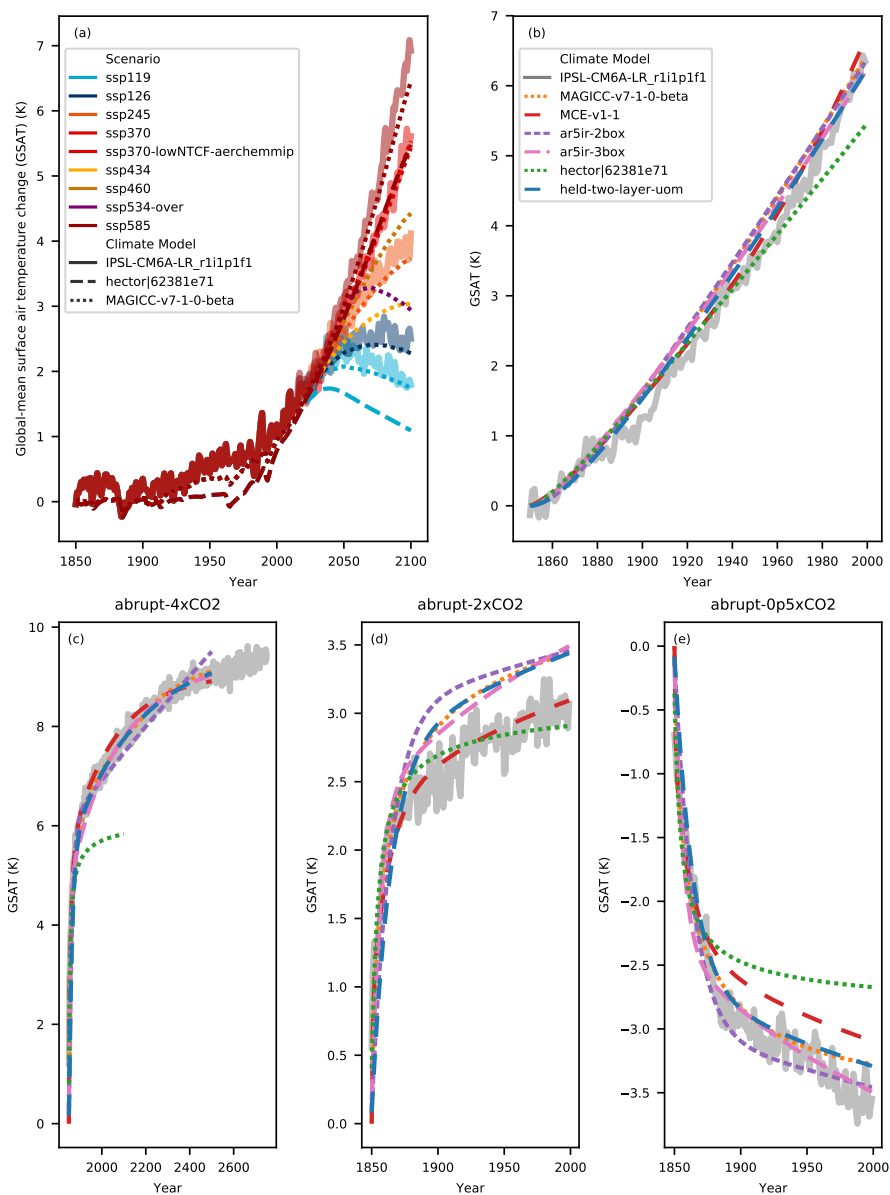

**Figure S24.** Emulation of IPSL-CM6A-LR\_r1i1p1f1 by RCMs in RCMIP Phase 1. The thick transparent lines are the target CMIP6 model output (here from IPSL-CM6A-LR\_r1i1p1f1). The thin lines are emulations from different RCMs. Panel (a) shows results for scenario based experiments while panels (b) - (e) show results for idealised CO2-only experiments (note that panels (b) - (e) share the same legend).



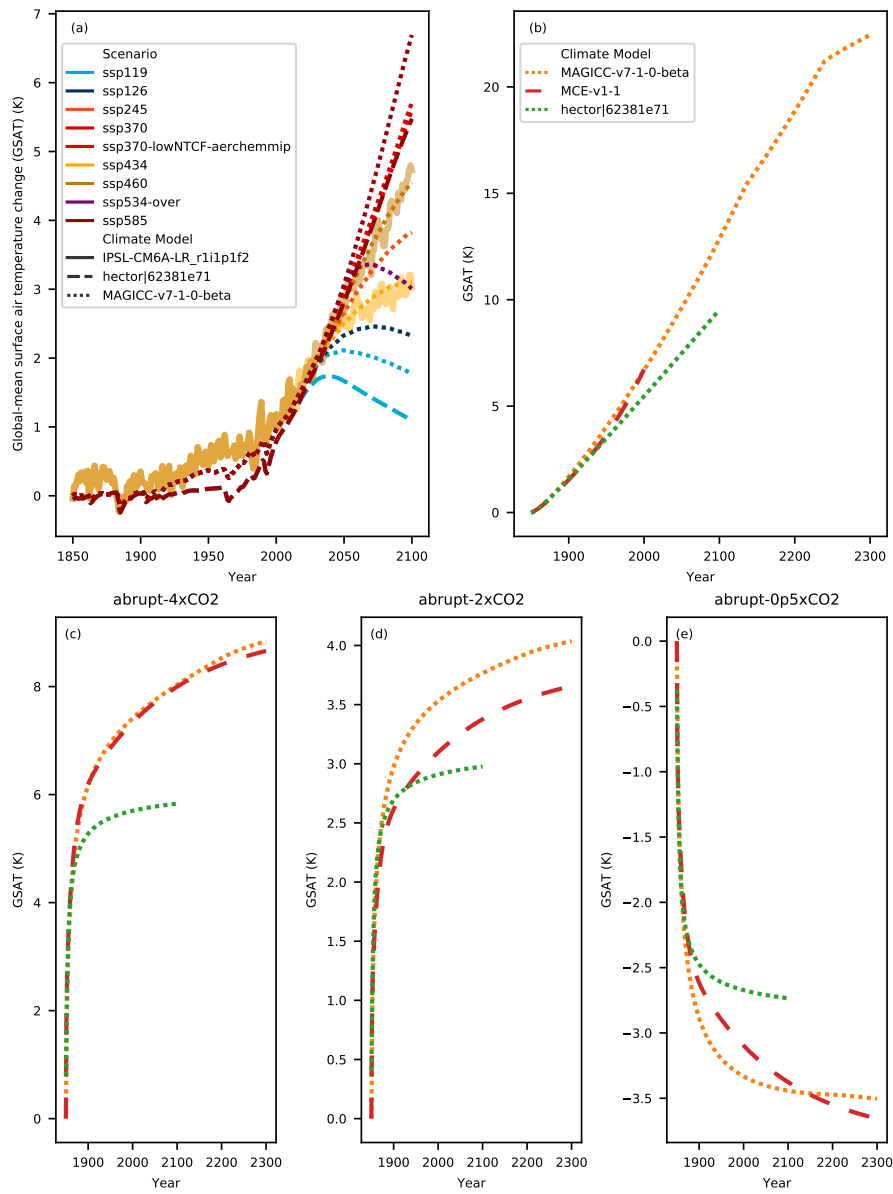

**Figure S25.** Emulation of IPSL-CM6A-LR\_r1i1p1f2 by RCMs in RCMIP Phase 1. The thick transparent lines are the target CMIP6 model output (here from IPSL-CM6A-LR\_r1i1p1f2). The thin lines are emulations from different RCMs. Panel (a) shows results for scenario based experiments while panels (b) - (e) show results for idealised CO2-only experiments (note that panels (b) - (e) share the same legend).

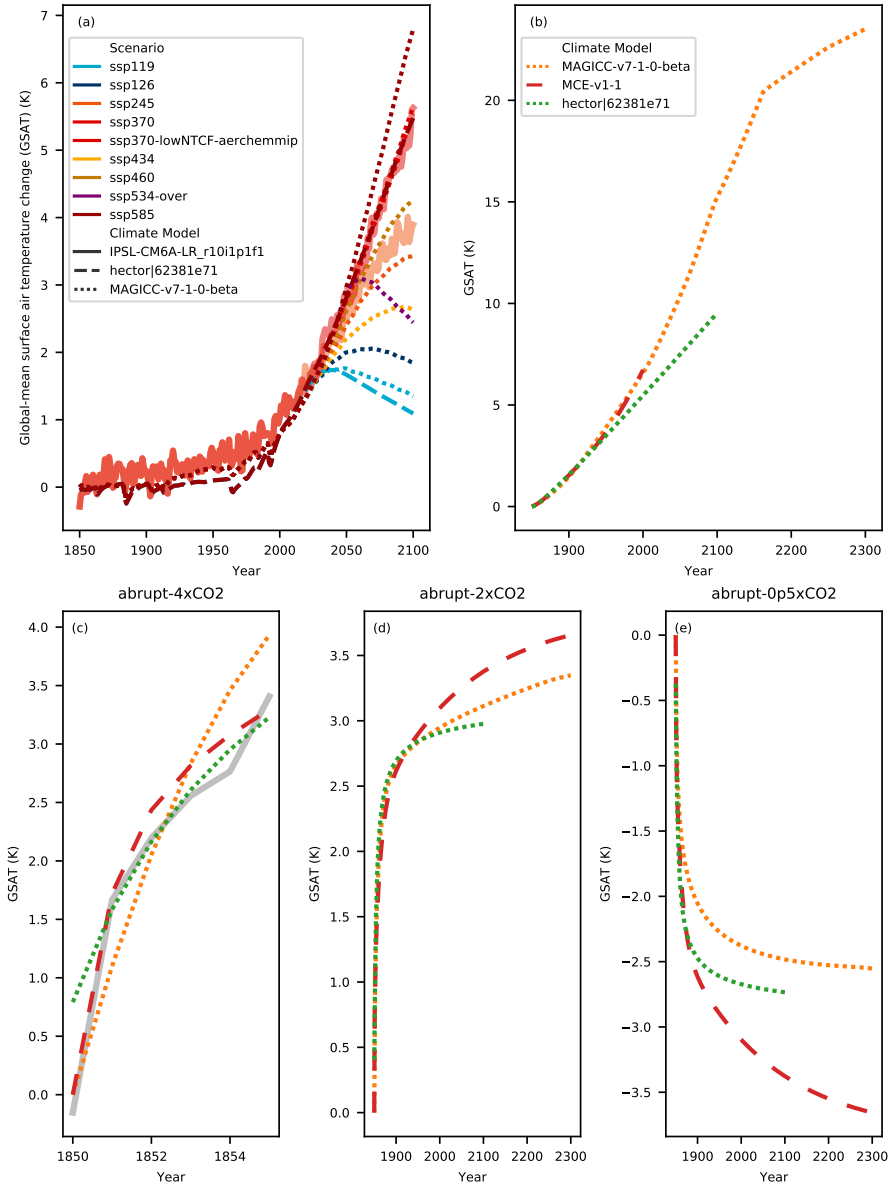

**Figure S26.** Emulation of IPSL-CM6A-LR\_r10i1p1f1 by RCMs in RCMIP Phase 1. The thick transparent lines are the target CMIP6 model output (here from IPSL-CM6A-LR\_r10i1p1f1). The thin lines are emulations from different RCMs. Panel (a) shows results for scenario based experiments while panels (b) - (e) show results for idealised CO<sub>2</sub>-only experiments (note that panels (b) - (e) share the same legend).



**Figure S27.** Emulation of AWI-CM-1-1-MR\_r1i1p1f1 by RCMs in RCMIP Phase 1. The thick transparent lines are the target CMIP6 model output (here from AWI-CM-1-1-MR\_r1i1p1f1). The thin lines are emulations from different RCMs. Panel (a) shows results for scenario based experiments while panels (b) - (e) show results for idealised CO<sub>2</sub>-only experiments (note that panels (b) - (e) share the same legend).

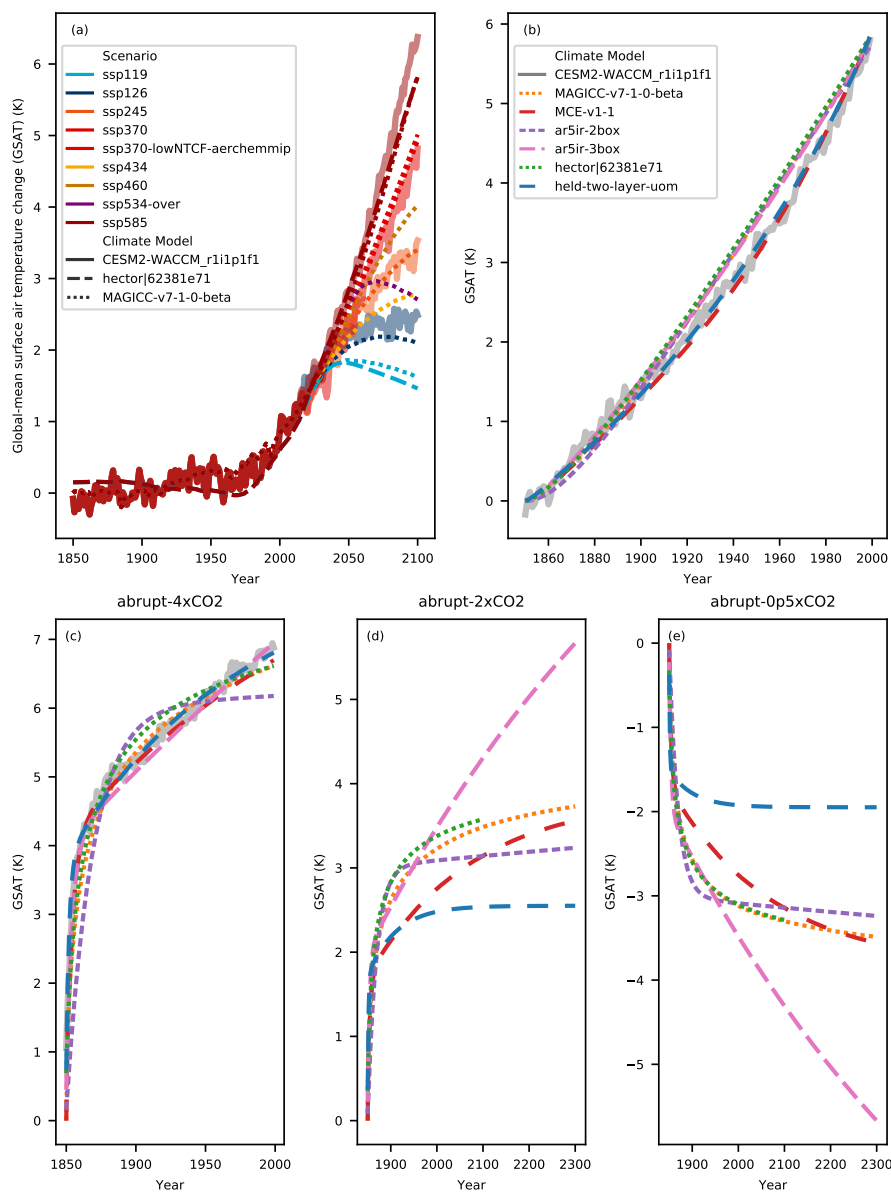

**Figure S28.** Emulation of CESM2-WACCM\_r1i1p1f1 by RCMs in RCMIP Phase 1. The thick transparent lines are the target CMIP6 model output (here from CESM2-WACCM\_r1i1p1f1). The thin lines are emulations from different RCMs. Panel (a) shows results for scenario based experiments while panels (b) - (e) show results for idealised CO2-only experiments (note that panels (b) - (e) share the same legend).

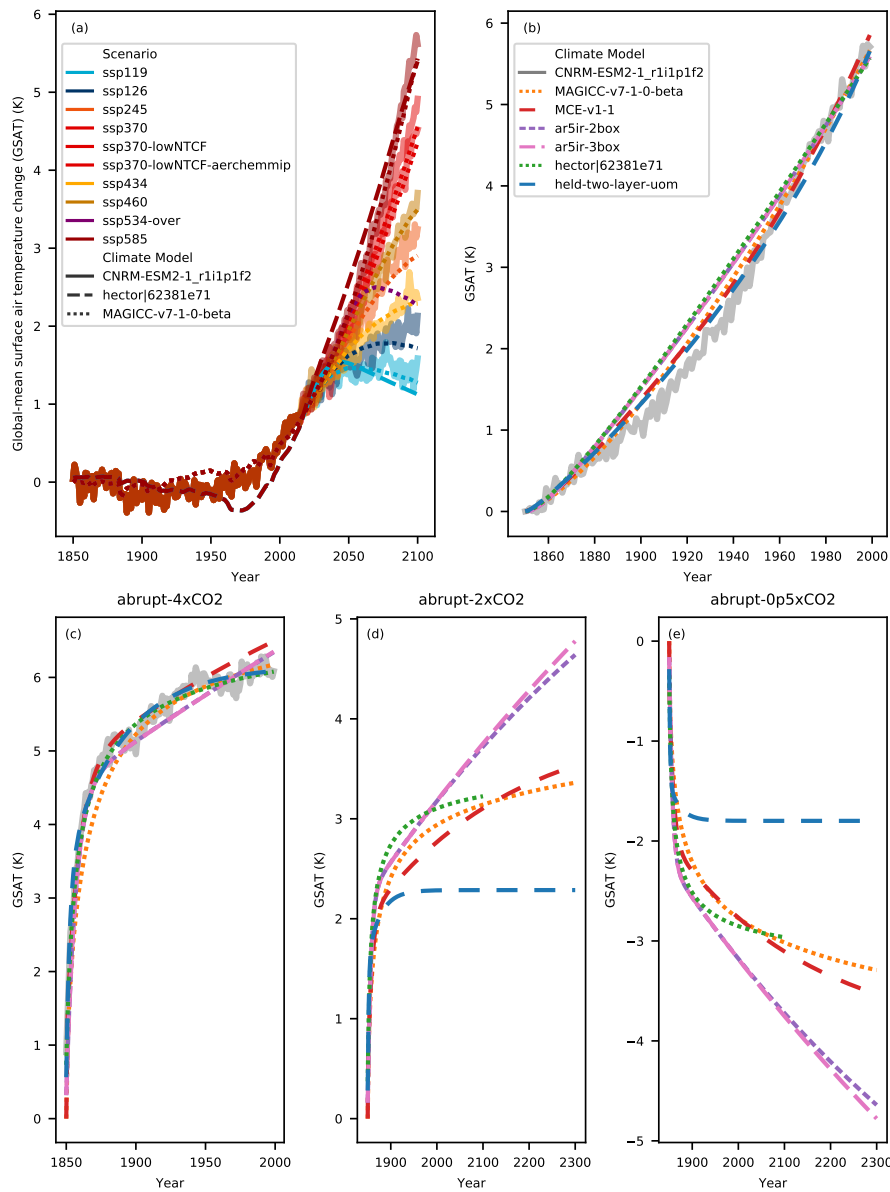

**Figure S29.** Emulation of CNRM-ESM2-1\_r1i1p1f2 by RCMs in RCMIP Phase 1. The thick transparent lines are the target CMIP6 model output (here from CNRM-ESM2-1\_r1i1p1f2). The thin lines are emulations from different RCMs. Panel (a) shows results for scenario based experiments while panels (b) - (e) show results for idealised CO2-only experiments (note that panels (b) - (e) share the same legend).

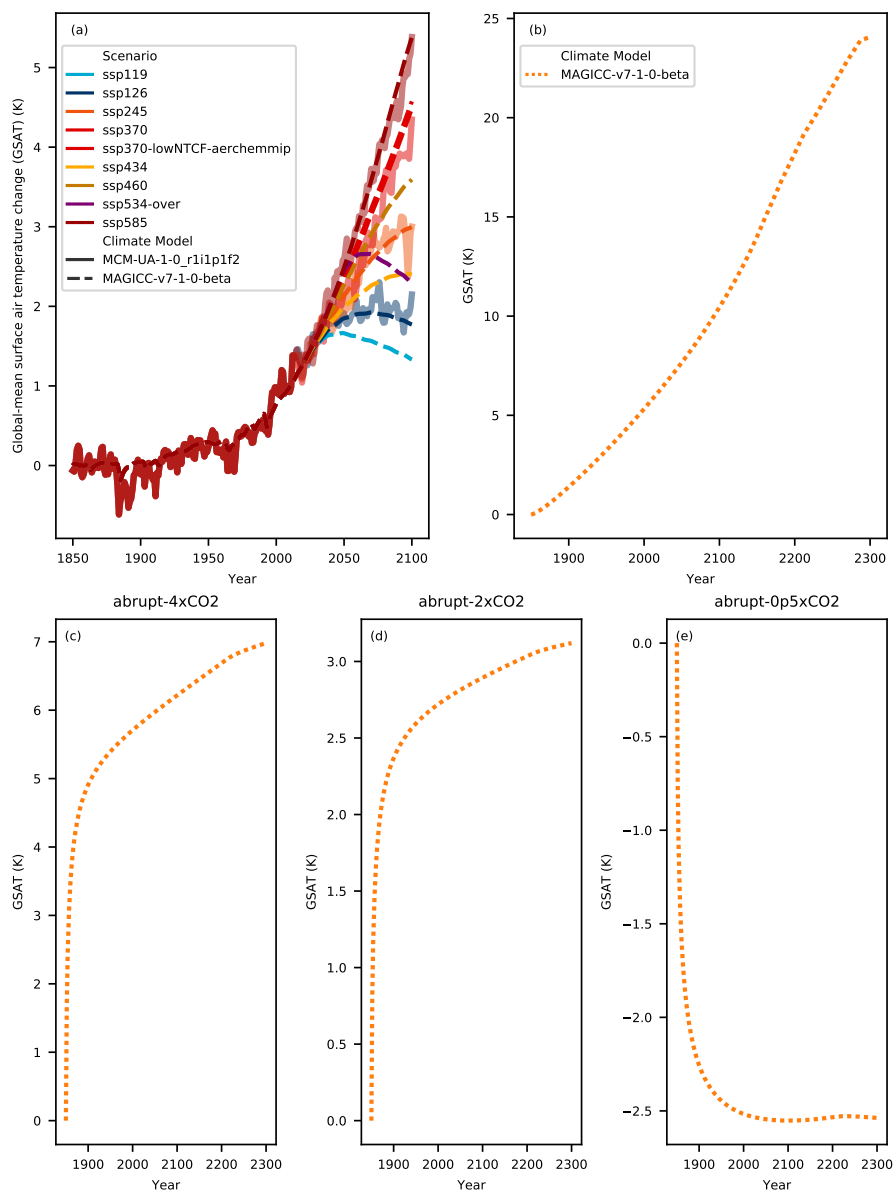

**Figure S30.** Emulation of MCM-UA-1-0\_r1i1p1f2 by RCMs in RCMIP Phase 1. The thick transparent lines are the target CMIP6 model output (here from MCM-UA-1-0\_r1i1p1f2). The thin lines are emulations from different RCMs. Panel (a) shows results for scenario based experiments while panels (b) - (e) show results for idealised CO<sub>2</sub>-only experiments (note that panels (b) - (e) share the same legend).

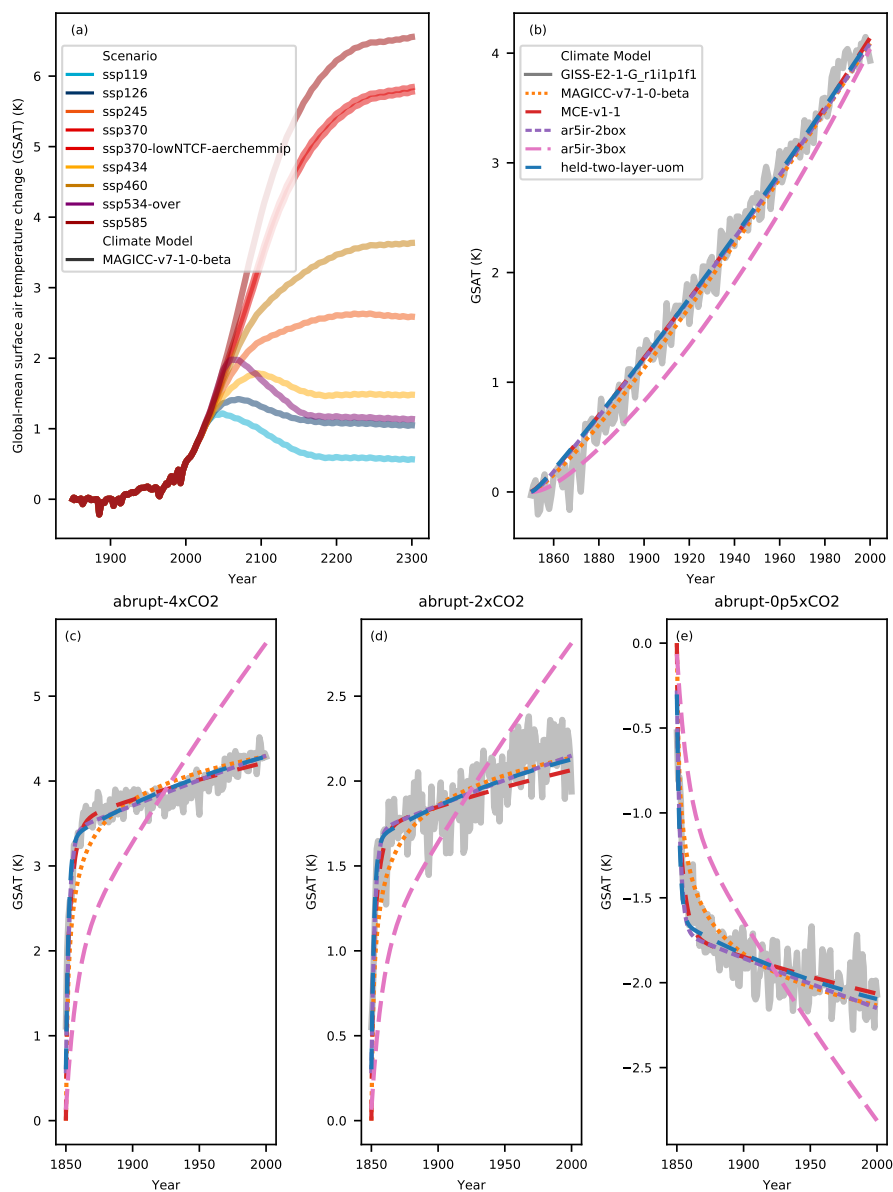

**Figure S31.** Emulation of GISS-E2-1-G\_r1i1p1f1 by RCMs in RCMIP Phase 1. The thick transparent lines are the target CMIP6 model output (here from GISS-E2-1-G\_r1i1p1f1). The thin lines are emulations from different RCMs. Panel (a) shows results for scenario based experiments while panels (b) - (e) show results for idealised CO<sub>2</sub>-only experiments (note that panels (b) - (e) share the same legend).

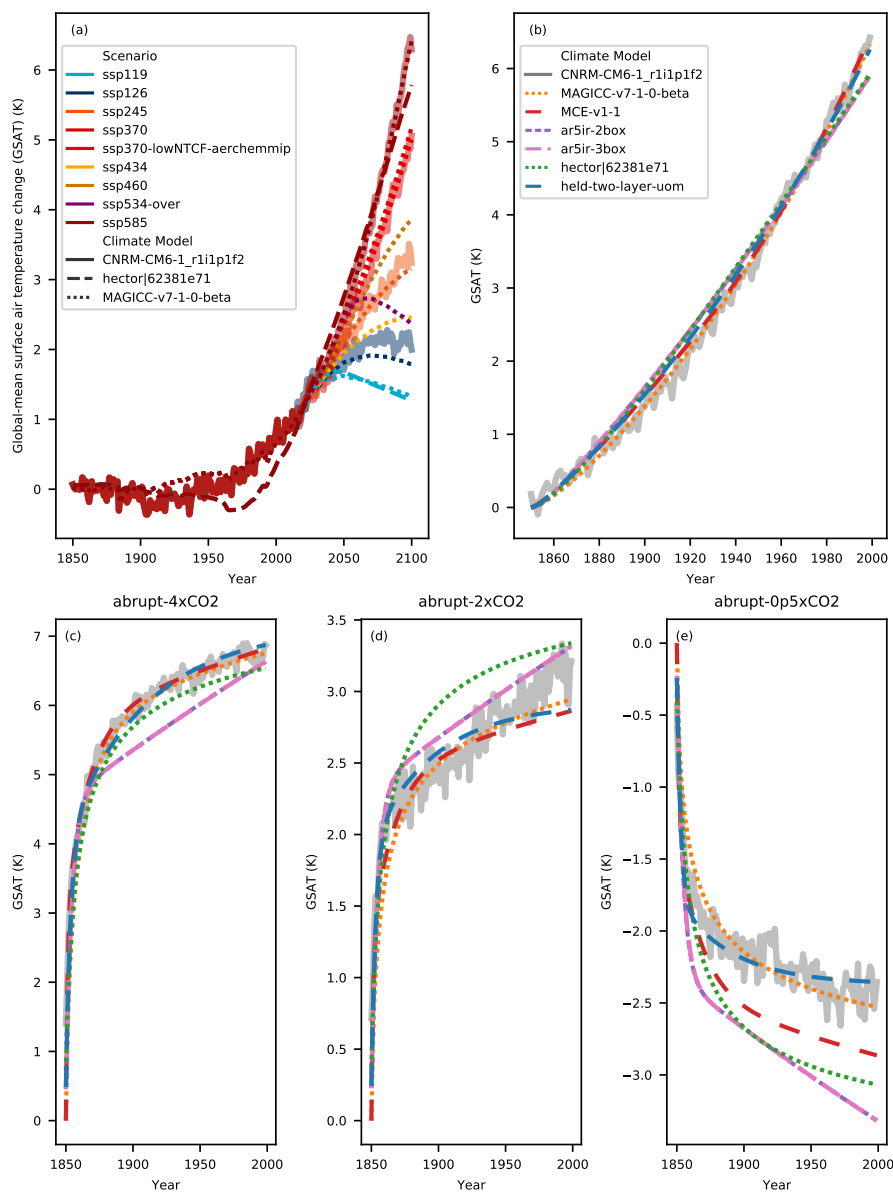

**Figure S32.** Emulation of CNRM-CM6-1\_r1i1p1f2 by RCMs in RCMIP Phase 1. The thick transparent lines are the target CMIP6 model output (here from CNRM-CM6-1\_r1i1p1f2). The thin lines are emulations from different RCMs. Panel (a) shows results for scenario based experiments while panels (b) - (e) show results for idealised CO<sub>2</sub>-only experiments (note that panels (b) - (e) share the same legend).



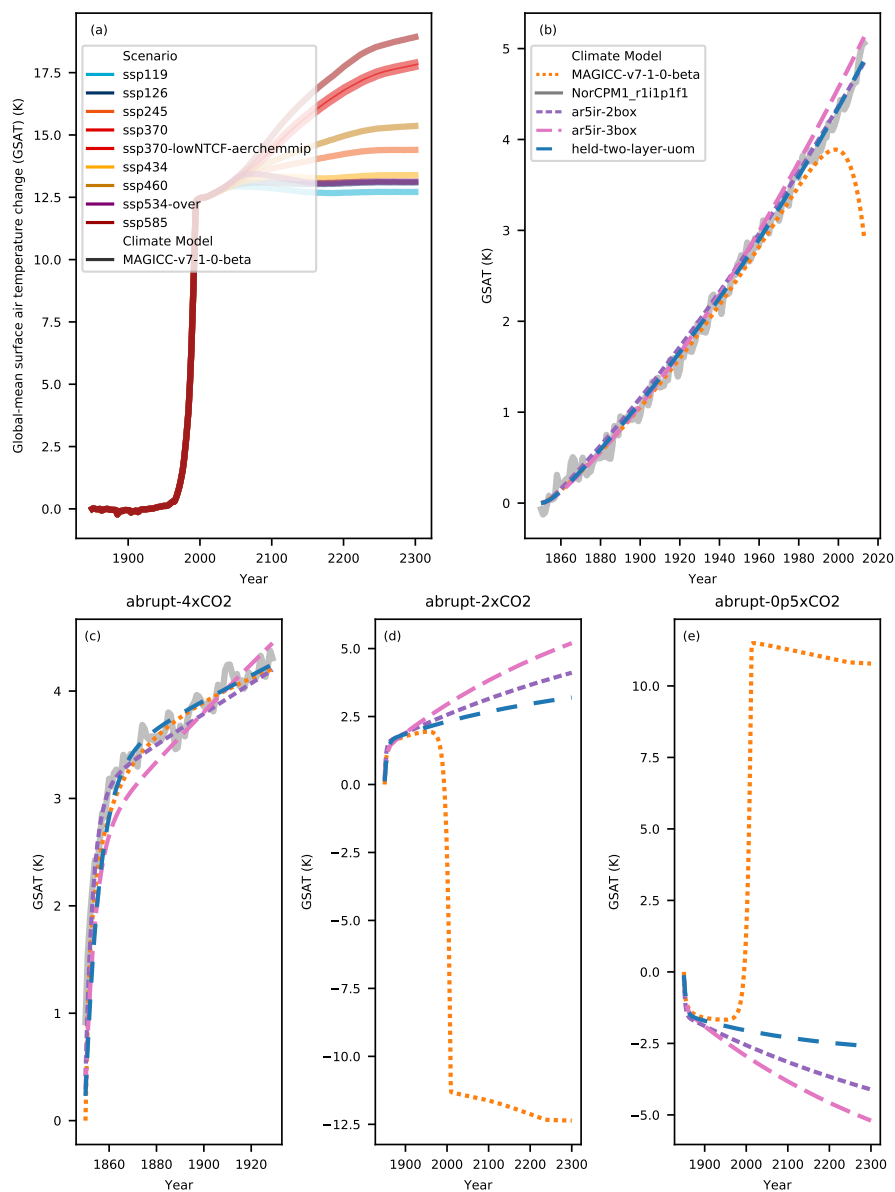

**Figure S33.** Emulation of NorCPM1\_r1i1p1f1 by RCMs in RCMIP Phase 1. The thick transparent lines are the target CMIP6 model output (here from NorCPM1\_r1i1p1f1). The thin lines are emulations from different RCMs. Panel (a) shows results for scenario based experiments while panels (b) - (e) show results for idealised CO<sub>2</sub>-only experiments (note that panels (b) - (e) share the same legend).

**Table S3.** RCMIP Phase 1 experiment overview (also available at [rcmip.org](http://rcmip.org)). In the ‘drivers’ column, the acronyms show the inputs which are provided to the models in order to perform the run. CC: CO<sub>2</sub> concentrations; CO: non-CO<sub>2</sub> WMGHG concentrations; EC: CO<sub>2</sub> emissions; EO: non-CO<sub>2</sub> WMGHG emissions; A: aerosol emissions; S: solar effective radiative forcing; V: volcanic effective radiative forcing. ESDOC refers to the Earth System Documentation service (<https://search.es-doc.org/>).

| ID                   | Drivers         | Summary                                                                                                                                                                                                                                                                                 | Further information       | Tier |
|----------------------|-----------------|-----------------------------------------------------------------------------------------------------------------------------------------------------------------------------------------------------------------------------------------------------------------------------------------|---------------------------|------|
| piControl            | CC, CO, A, S, V | Pre-industrial control simulation.                                                                                                                                                                                                                                                      | ESDOC                     | 1    |
| esm-piControl        | EC, CO, A, S, V | Pre-industrial control simulation with zero anthropogenic perturbation to CO <sub>2</sub> emissions.                                                                                                                                                                                    | ESDOC                     | 1    |
| esm-piControl-allGHG | EC, EO, A, S, V | Pre-industrial control simulation with zero anthropogenic perturbation to GHG emissions.                                                                                                                                                                                                | RCMIP specific experiment | 2    |
| 1pctCO2              | CC              | 1 % per year increase in atmospheric CO <sub>2</sub> concentrations.                                                                                                                                                                                                                    | ESDOC                     | 1    |
| 1pctCO2-4xext        | CC              | 1 % per year increase in atmospheric CO <sub>2</sub> concentrations until atmospheric CO <sub>2</sub> concentrations quadruple, constant CO <sub>2</sub> concentrations thereafter.                                                                                                     | ESDOC                     | 1    |
| 1pctCO2-cdr          | CC              | 1 % per year increase in atmospheric CO <sub>2</sub> concentrations until atmospheric CO <sub>2</sub> concentrations quadruple and then 1% per year decrease in atmospheric CO <sub>2</sub> concentrations until CO <sub>2</sub> returns to pre-industrial levels, constant thereafter. | ESDOC                     | 2    |
| abrupt-4xCO2         | CC              | Abrupt quadrupling of atmospheric CO <sub>2</sub> concentrations.                                                                                                                                                                                                                       | ESDOC                     | 1    |
| abrupt-2xCO2         | CC              | Abrupt doubling of atmospheric CO <sub>2</sub> concentrations.                                                                                                                                                                                                                          | ESDOC                     | 1    |
| abrupt-0p5xCO2       | CC              | Abrupt halving of atmospheric CO <sub>2</sub> concentrations.                                                                                                                                                                                                                           | ESDOC                     | 1    |
| esm-pi-cdr-pulse     | EC              | Removal of 100 GtC in a single year from pre-industrial atmosphere, zero CO <sub>2</sub> emissions thereafter.                                                                                                                                                                          | ESDOC                     | 2    |

**Table S3.** Continued.

| ID                | Drivers         | Summary                                                                                                                  | Further information                                                                           | Tier |
|-------------------|-----------------|--------------------------------------------------------------------------------------------------------------------------|-----------------------------------------------------------------------------------------------|------|
| esm-pi-CO2pulse   | EC              | Addition of 100 GtC in a single year from pre-industrial atmosphere, zero CO2 emissions thereafter.                      | ESDOC                                                                                         | 2    |
| esm-bell-1000PgC  | EC              | Cumulative addition of 1000 PgC following a bell-curved shaped emissions timeseries.                                     | ESDOC                                                                                         | 3    |
| esm-bell-2000PgC  | EC              | Cumulative addition of 2000 PgC following a bell-curved shaped emissions timeseries.                                     | ESDOC                                                                                         | 3    |
| esm-bell-750PgC   | EC              | Cumulative addition of 750 PgC following a bell-curved shaped emissions timeseries.                                      | ESDOC                                                                                         | 3    |
| historical        | CC, CO, A, S, V | Simulation of 1850-2014.                                                                                                 | ESDOC                                                                                         | 1    |
| historical-cmip5  | CC, CO, A, S, V | Simulation of 1850-2004, matching forcings as estimated in CMIP5.                                                        | <a href="http://www.pik-potsdam.de/~mmalte/rcps/">http://www.pik-potsdam.de/~mmalte/rcps/</a> | 2    |
| hist-aer          | A               | Simulation of 1850-2014 with aerosol emissions only.                                                                     | ESDOC                                                                                         | 3    |
| hist-CO2          | CC              | Simulation of 1850-2014 with changing CO2 concentrations only.                                                           | ESDOC                                                                                         | 3    |
| hist-GHG          | CC, CO          | Simulation of 1850-2014 with changing GHG concentrations only.                                                           | ESDOC                                                                                         | 3    |
| hist-nat          | S, V            | Simulation of 1850-2014 with changing natural forcings only.                                                             | ESDOC                                                                                         | 3    |
| hist-sol          | S               | Simulation of 1850-2014 with changing solar forcing only.                                                                | ESDOC                                                                                         | 3    |
| hist-volc         | V               | Simulation of 1850-2014 with changing volcanic forcing only.                                                             | ESDOC                                                                                         | 3    |
| ssp119            | CC, CO, A, S, V | Low-end scenario reaching radiative forcing $\sim 1.9 \text{ Wm}^{-2}$ in 2100 (using the SSP1 socioeconomic storyline). | ESDOC                                                                                         | 1    |
| esm-ssp119        | EC, CO, A, S, V | As above except CO2 emissions driven.                                                                                    | ESDOC                                                                                         | 1    |
| esm-ssp119-allGHG | EC, EO, A, S, V | As above except all GHG emissions driven.                                                                                | ESDOC                                                                                         | 2    |

**Table S3.** Continued.

| ID                        | Drivers         | Summary                                                                                                                                                          | Further information | Tier |
|---------------------------|-----------------|------------------------------------------------------------------------------------------------------------------------------------------------------------------|---------------------|------|
| ssp126                    | CC, CO, A, S, V | Update of RCP2.6 based on the SSP1 socioeconomic storyline.                                                                                                      | ESDOC               | 2    |
| esm-ssp126                | EC, CO, A, S, V | As above except CO2 emissions driven.                                                                                                                            | ESDOC               | 3    |
| esm-ssp126-allGHG         | EC, EO, A, S, V | As above except all GHG emissions driven.                                                                                                                        | ESDOC               | 3    |
| ssp245                    | CC, CO, A, S, V | Update of RCP4.5 based on the SSP2 socioeconomic storyline.                                                                                                      | ESDOC               | 2    |
| esm-ssp245                | EC, CO, A, S, V | As above except CO2 emissions driven.                                                                                                                            | ESDOC               | 3    |
| esm-ssp245-allGHG         | EC, EO, A, S, V | As above except all GHG emissions driven.                                                                                                                        | ESDOC               | 3    |
| ssp370                    | CC, CO, A, S, V | Gap-filling scenario reaching radiative forcing $\sim 7.0 \text{ Wm}^{-2}$ in 2100 (using the SSP3 socioeconomic storyline).                                     | ESDOC               | 2    |
| esm-ssp370                | EC, CO, A, S, V | As above except CO2 emissions driven.                                                                                                                            | ESDOC               | 3    |
| esm-ssp370-allGHG         | EC, EO, A, S, V | As above except all GHG emissions driven.                                                                                                                        | ESDOC               | 3    |
| ssp370-lowNTCF            | CC, CO, A, S, V | Gap-filling scenario reaching radiative forcing $\sim 7.0 \text{ Wm}^{-2}$ in 2100 with low near-term climate forcings (using the SSP3 socioeconomic storyline). | ESDOC               | 2    |
| esm-ssp370-lowNTCF        | EC, CO, A, S, V | As above except CO2 emissions driven.                                                                                                                            | ESDOC               | 3    |
| esm-ssp370-lowNTCF-allGHG | EC, EO, A, S, V | As above except all GHG emissions driven.                                                                                                                        | ESDOC               | 3    |
| ssp370-lowNTCF-gidden     | CC, CO, A, S, V | Comparison scenario, follows the ssp370-lowNTCF quantification presented in Gidden et al. (2019).                                                                | RCMIP specific      | 3    |

**Table S3.** Continued.

| <b>ID</b>                        | <b>Drivers</b>  | <b>Summary</b>                                                                                                                                                           | <b>Further information</b> | <b>Tier</b> |
|----------------------------------|-----------------|--------------------------------------------------------------------------------------------------------------------------------------------------------------------------|----------------------------|-------------|
| esm-ssp370-lowNTCF-gidden        | EC, CO, A, S, V | As above except CO2 emissions driven.                                                                                                                                    | RCMIP specific             | 3           |
| esm-ssp370-lowNTCF-gidden-allGHG | EC, EO, A, S, V | As above except all GHG emissions driven.                                                                                                                                | RCMIP specific             | 3           |
| ssp434                           | CC, CO, A, S, V | Gap-filling scenario reaching radiative forcing $\sim 3.4 \text{ Wm}^{-2}$ in 2100 with low near-term climate forcings (using the SSP4 socioeconomic storyline).         | ESDOC                      | 2           |
| esm-ssp434                       | EC, CO, A, S, V | As above except CO2 emissions driven.                                                                                                                                    | ESDOC                      | 3           |
| esm-ssp434-allGHG                | EC, EO, A, S, V | As above except all GHG emissions driven.                                                                                                                                | ESDOC                      | 3           |
| ssp460                           | CC, CO, A, S, V | Update of RCP6.0 based on the SSP4 socioeconomic storyline.                                                                                                              | ESDOC                      | 2           |
| esm-ssp460                       | EC, CO, A, S, V | As above except CO2 emissions driven.                                                                                                                                    | ESDOC                      | 3           |
| esm-ssp460-allGHG                | EC, EO, A, S, V | As above except all GHG emissions driven.                                                                                                                                | ESDOC                      | 3           |
| ssp534-over                      | CC, CO, A, S, V | Overshoot scenario reaching radiative forcing $\sim 3.4 \text{ Wm}^{-2}$ in 2100 having followed the ssp585 pathway until 2030 (using the SSP5 socioeconomic storyline). | ESDOC                      | 2           |
| esm-ssp534-over                  | EC, CO, A, S, V | As above except CO2 emissions driven.                                                                                                                                    | ESDOC                      | 3           |
| esm-ssp534-over-allGHG           | EC, EO, A, S, V | As above except all GHG emissions driven.                                                                                                                                | ESDOC                      | 3           |
| ssp585                           | CC, CO, A, S, V | Update of RCP8.5 based on the SSP5 socioeconomic storyline.                                                                                                              | ESDOC                      | 1           |
| esm-ssp585                       | EC, CO, A, S, V | As above except CO2 emissions driven.                                                                                                                                    | ESDOC                      | 1           |

**Table S3.** Continued.

| <b>ID</b>         | <b>Drivers</b>  | <b>Summary</b>                            | <b>Further information</b>                                                                    | <b>Tier</b> |
|-------------------|-----------------|-------------------------------------------|-----------------------------------------------------------------------------------------------|-------------|
| esm-ssp585-allGHG | EC, EO, A, S, V | As above except all GHG emissions driven. | ESDOC                                                                                         | 2           |
| rcp26             | CC, CO, A, S, V | RCP2.6 (from CMIP5).                      | <a href="http://www.pik-potsdam.de/~mmalte/rcps/">http://www.pik-potsdam.de/~mmalte/rcps/</a> | 3           |
| esm-rcp26         | EC, CO, A, S, V | As above except CO2 emissions driven.     | <a href="http://www.pik-potsdam.de/~mmalte/rcps/">http://www.pik-potsdam.de/~mmalte/rcps/</a> | 3           |
| esm-rcp26-allGHG  | EC, EO, A, S, V | As above except all GHG emissions driven. | <a href="http://www.pik-potsdam.de/~mmalte/rcps/">http://www.pik-potsdam.de/~mmalte/rcps/</a> | 3           |
| rcp45             | CC, CO, A, S, V | RCP4.5 (from CMIP5).                      | <a href="http://www.pik-potsdam.de/~mmalte/rcps/">http://www.pik-potsdam.de/~mmalte/rcps/</a> | 3           |
| esm-rcp45         | EC, CO, A, S, V | As above except CO2 emissions driven.     | <a href="http://www.pik-potsdam.de/~mmalte/rcps/">http://www.pik-potsdam.de/~mmalte/rcps/</a> | 3           |
| esm-rcp45-allGHG  | EC, EO, A, S, V | As above except all GHG emissions driven. | <a href="http://www.pik-potsdam.de/~mmalte/rcps/">http://www.pik-potsdam.de/~mmalte/rcps/</a> | 3           |
| rcp60             | CC, CO, A, S, V | RCP6.0 (from CMIP5).                      | <a href="http://www.pik-potsdam.de/~mmalte/rcps/">http://www.pik-potsdam.de/~mmalte/rcps/</a> | 3           |
| esm-rcp60         | EC, CO, A, S, V | As above except CO2 emissions driven.     | <a href="http://www.pik-potsdam.de/~mmalte/rcps/">http://www.pik-potsdam.de/~mmalte/rcps/</a> | 3           |
| esm-rcp60-allGHG  | EC, EO, A, S, V | As above except all GHG emissions driven. | <a href="http://www.pik-potsdam.de/~mmalte/rcps/">http://www.pik-potsdam.de/~mmalte/rcps/</a> | 3           |
| rcp85             | CC, CO, A, S, V | RCP8.5 (from CMIP5).                      | <a href="http://www.pik-potsdam.de/~mmalte/rcps/">http://www.pik-potsdam.de/~mmalte/rcps/</a> | 3           |
| esm-rcp85         | EC, CO, A, S, V | As above except CO2 emissions driven.     | <a href="http://www.pik-potsdam.de/~mmalte/rcps/">http://www.pik-potsdam.de/~mmalte/rcps/</a> | 3           |
| esm-rcp85-allGHG  | EC, EO, A, S, V | As above except all GHG emissions driven. | <a href="http://www.pik-potsdam.de/~mmalte/rcps/">http://www.pik-potsdam.de/~mmalte/rcps/</a> | 3           |

**Table S4.** RCMIP Phase 1 variable overview (also available at rc mip.org).

| Category                   | Variable                                        | Unit | Definition                                                                                                                              | Tier |
|----------------------------|-------------------------------------------------|------|-----------------------------------------------------------------------------------------------------------------------------------------|------|
| Atmospheric Concentrations | Atmospheric Concentrations\CH4                  | ppb  | atmospheric concentrations of CH <sub>4</sub>                                                                                           | 1    |
| Atmospheric Concentrations | Atmospheric Concentrations\CO2                  | ppm  | atmospheric concentrations of CO <sub>2</sub>                                                                                           | 1    |
| Atmospheric Concentrations | Atmospheric Concentrations\F-Gases              | ppm  | equivalent species atmospheric concentrations of F-gases, expressed as CO <sub>2</sub> -equivalent                                      | 3    |
| Atmospheric Concentrations | Atmospheric Concentrations\F-Gases\HFC          | ppm  | equivalent species atmospheric concentrations of hydrofluorocarbons (HFCs and HCFCs), provided as aggregate CO <sub>2</sub> -equivalent | 3    |
| Atmospheric Concentrations | Atmospheric Concentrations\F-Gases\HFC\HFC125   | ppt  | atmospheric concentrations of HFC125                                                                                                    | 2    |
| Atmospheric Concentrations | Atmospheric Concentrations\F-Gases\HFC\HFC134a  | ppt  | atmospheric concentrations of HFC134a                                                                                                   | 2    |
| Atmospheric Concentrations | Atmospheric Concentrations\F-Gases\HFC\HFC143a  | ppt  | atmospheric concentrations of HFC143a                                                                                                   | 2    |
| Atmospheric Concentrations | Atmospheric Concentrations\F-Gases\HFC\HFC152a  | ppt  | atmospheric concentrations of HFC152a                                                                                                   | 2    |
| Atmospheric Concentrations | Atmospheric Concentrations\F-Gases\HFC\HFC227ea | ppt  | atmospheric concentrations of HFC227ea                                                                                                  | 2    |
| Atmospheric Concentrations | Atmospheric Concentrations\F-Gases\HFC\HFC23    | ppt  | atmospheric concentrations of HFC23                                                                                                     | 2    |
| Atmospheric Concentrations | Atmospheric Concentrations\F-Gases\HFC\HFC236fa | ppt  | atmospheric concentrations of HFC236fa                                                                                                  | 2    |

**Table S4.** Continued.

| Category                   | Variable                         | Unit                 | Definition                                                                                                                                                     | Tier |
|----------------------------|----------------------------------|----------------------|----------------------------------------------------------------------------------------------------------------------------------------------------------------|------|
| Atmospheric Concentrations | Atmospheric Gases\HFC\HFC245fa   | Concentrations\F-ppt | atmospheric concentrations of HFC245fa                                                                                                                         | 2    |
| Atmospheric Concentrations | Atmospheric Gases\HFC\HFC32      | Concentrations\F-ppt | atmospheric concentrations of HFC32                                                                                                                            | 2    |
| Atmospheric Concentrations | Atmospheric Gases\HFC\HFC365mfc  | Concentrations\F-ppt | atmospheric concentrations of HFC365mfc                                                                                                                        | 2    |
| Atmospheric Concentrations | Atmospheric Gases\HFC\HFC4310mee | Concentrations\F-ppt | atmospheric concentrations of HFC43-10mee                                                                                                                      | 2    |
| Atmospheric Concentrations | Atmospheric Gases\NF3            | Concentrations\F-ppt | atmospheric concentrations of nitrogen trifluoride (NF <sub>3</sub> )                                                                                          | 2    |
| Atmospheric Concentrations | Atmospheric Gases\PFC            | Concentrations\F-ppt | equivalent species atmospheric concentrations of perfluorocarbons (PFCs, as defined by Table 8.A.1 of AR5), provided as aggregate CO <sub>2</sub> -equivalents | 3    |
| Atmospheric Concentrations | Atmospheric Gases\PFC\C2F6       | Concentrations\F-ppt | atmospheric concentrations of C <sub>2</sub> F <sub>6</sub>                                                                                                    | 2    |
| Atmospheric Concentrations | Atmospheric Gases\PFC\C3F8       | Concentrations\F-ppt | atmospheric concentrations of C <sub>3</sub> F <sub>8</sub>                                                                                                    | 2    |
| Atmospheric Concentrations | Atmospheric Gases\PFC\C4F10      | Concentrations\F-ppt | atmospheric concentrations of C <sub>4</sub> F <sub>10</sub>                                                                                                   | 2    |
| Atmospheric Concentrations | Atmospheric Gases\PFC\C5F12      | Concentrations\F-ppt | atmospheric concentrations of C <sub>5</sub> F <sub>12</sub>                                                                                                   | 2    |
| Atmospheric Concentrations | Atmospheric Gases\PFC\C6F14      | Concentrations\F-ppt | atmospheric concentrations of C <sub>6</sub> F <sub>14</sub>                                                                                                   | 2    |



**Table S4.** Continued.

| Category                   | Variable                     |                         | Unit | Definition                                                                                               | Tier |
|----------------------------|------------------------------|-------------------------|------|----------------------------------------------------------------------------------------------------------|------|
| Atmospheric Concentrations | Atmospheric Gases PFC C7F16  | Concentrations F-       | ppt  | atmospheric concentrations of C <sub>7</sub> F <sub>16</sub>                                             | 2    |
| Atmospheric Concentrations | Atmospheric Gases PFC C8F18  | Concentrations F-       | ppt  | atmospheric concentrations of C <sub>8</sub> F <sub>18</sub>                                             | 2    |
| Atmospheric Concentrations | Atmospheric Gases PFC C4F8   | Concentrations F-       | ppt  | atmospheric concentrations of c-C <sub>4</sub> F <sub>8</sub>                                            | 2    |
| Atmospheric Concentrations | Atmospheric Gases PFC CF4    | Concentrations F-       | ppt  | atmospheric concentrations of CF <sub>4</sub>                                                            | 2    |
| Atmospheric Concentrations | Atmospheric Gases SF6        | Concentrations F-       | ppt  | atmospheric concentrations of sulfur hexafluoride (SF <sub>6</sub> )                                     | 2    |
| Atmospheric Concentrations | Atmospheric Gases SO2F2      | Concentrations F-       | ppt  | atmospheric concentrations of sulfonyl fluoride (SO <sub>2</sub> F <sub>2</sub> )                        | 2    |
| Atmospheric Concentrations | Atmospheric Gases            | Concentrations Montreal | ppm  | equivalent species atmospheric concentrations of Montreal gases, expressed as CO <sub>2</sub> equivalent | 3    |
| Atmospheric Concentrations | Atmospheric Gases CCl4       | Concentrations Montreal | ppt  | atmospheric concentrations of CCl <sub>4</sub>                                                           | 2    |
| Atmospheric Concentrations | Atmospheric Gases CFC        | Concentrations Montreal | ppm  | atmospheric concentrations of CFC gases, expressed as CO <sub>2</sub> equivalent                         | 3    |
| Atmospheric Concentrations | Atmospheric Gases CFC CFC11  | Concentrations Montreal | ppt  | atmospheric concentrations of CFC11                                                                      | 2    |
| Atmospheric Concentrations | Atmospheric Gases CFC CFC113 | Concentrations Montreal | ppt  | atmospheric concentrations of CFC113                                                                     | 2    |

**Table S4.** Continued.

| <b>Category</b>            | <b>Variable</b>                                                            | <b>Unit</b> | <b>Definition</b>                                              | <b>Tier</b> |
|----------------------------|----------------------------------------------------------------------------|-------------|----------------------------------------------------------------|-------------|
| Atmospheric Concentrations | Atmospheric Concentrations Montreal Gases CFC CFC114                       | ppt         | atmospheric concentrations of CFC114                           | 2           |
| Atmospheric Concentrations | Atmospheric Concentrations Montreal Gases CFC CFC115                       | ppt         | atmospheric concentrations of CFC115                           | 2           |
| Atmospheric Concentrations | Atmospheric Concentrations Montreal Gases CFC CFC12                        | ppt         | atmospheric concentrations of CFC12                            | 2           |
| Atmospheric Concentrations | Atmospheric Concentrations Montreal Gases CH <sub>2</sub> Cl <sub>2</sub>  | ppt         | atmospheric concentrations of CH <sub>2</sub> Cl <sub>2</sub>  | 2           |
| Atmospheric Concentrations | Atmospheric Concentrations Montreal Gases CH <sub>3</sub> Br               | ppt         | atmospheric concentrations of CH <sub>3</sub> Br               | 2           |
| Atmospheric Concentrations | Atmospheric Concentrations Montreal Gases CH <sub>3</sub> CCl <sub>3</sub> | ppt         | atmospheric concentrations of CH <sub>3</sub> CCl <sub>3</sub> | 2           |
| Atmospheric Concentrations | Atmospheric Concentrations Montreal Gases CH <sub>3</sub> Cl               | ppt         | atmospheric concentrations of CH <sub>3</sub> Cl               | 2           |
| Atmospheric Concentrations | Atmospheric Concentrations Montreal Gases CHCl <sub>3</sub>                | ppt         | atmospheric concentrations of CHCl <sub>3</sub>                | 2           |
| Atmospheric Concentrations | Atmospheric Concentrations Montreal Gases Halon1202                        | ppt         | atmospheric concentrations of Halon-1202                       | 2           |
| Atmospheric Concentrations | Atmospheric Concentrations Montreal Gases Halon1211                        | ppt         | atmospheric concentrations of Halon-1211                       | 2           |

**Table S4.** Continued.

| Category                   | Variable                                                     | Unit                               | Definition                                                                                                                                                                                                                                                                                                                                                    | Tier |
|----------------------------|--------------------------------------------------------------|------------------------------------|---------------------------------------------------------------------------------------------------------------------------------------------------------------------------------------------------------------------------------------------------------------------------------------------------------------------------------------------------------------|------|
| Atmospheric Concentrations | Atmospheric Concentrations Montreal Gases Halon1301          | ppt                                | atmospheric concentrations of Halon-1301                                                                                                                                                                                                                                                                                                                      | 2    |
| Atmospheric Concentrations | Atmospheric Concentrations Montreal Gases Halon2402          | ppt                                | atmospheric concentrations of Halon-2402                                                                                                                                                                                                                                                                                                                      | 2    |
| Atmospheric Concentrations | Atmospheric Concentrations Montreal Gases HCFC141b           | ppt                                | atmospheric concentrations of HCFC141b                                                                                                                                                                                                                                                                                                                        | 2    |
| Atmospheric Concentrations | Atmospheric Concentrations Montreal Gases HCFC142b           | ppt                                | atmospheric concentrations of HCFC22                                                                                                                                                                                                                                                                                                                          | 2    |
| Atmospheric Concentrations | Atmospheric Concentrations Montreal Gases HCFC22             | ppt                                | atmospheric concentrations of HCFC22                                                                                                                                                                                                                                                                                                                          | 2    |
| Atmospheric Concentrations | Atmospheric Concentrations N2O                               | ppb                                | atmospheric concentrations of N <sub>2</sub> O                                                                                                                                                                                                                                                                                                                | 2    |
| Carbon Cycle               | Net Land to Atmosphere Flux CH4                              | MtCH <sub>4</sub> yr <sup>-1</sup> | net flux of CH <sub>4</sub> from the land to the atmosphere (not including AFOLU and other anthropogenic emissions). A positive value indicates release of CH <sub>4</sub> from the land, a negative value indicates a net land uptake.                                                                                                                       | 2    |
| Carbon Cycle               | Net Land to Atmosphere Flux CH4 Earth System Feedbacks       | MtCH <sub>4</sub> yr <sup>-1</sup> | net flux of CH <sub>4</sub> from the land to the atmosphere (not including AFOLU and other anthropogenic emissions) due to Earth System Feedbacks. A positive value indicates release of CH <sub>4</sub> from the land, a negative value indicates a net land uptake.                                                                                         | 2    |
| Carbon Cycle               | Net Land to Atmosphere Flux CH4 Earth System Feedbacks Other | MtCH <sub>4</sub> yr <sup>-1</sup> | net flux of CH <sub>4</sub> from the land to the atmosphere (not including AFOLU and other anthropogenic emissions) due to non-permafrost feedbacks. A positive value indicates release of CH <sub>4</sub> from the land, a negative value indicates a net land uptake. Please specify in a comment on the comments sheet, which feedbacks are included here. | 2    |

Table S4. Continued.

| Category     | Variable                                                                       | Unit                               | Definition                                                                                                                                                                                                                                                                                                                                                    | Tier |
|--------------|--------------------------------------------------------------------------------|------------------------------------|---------------------------------------------------------------------------------------------------------------------------------------------------------------------------------------------------------------------------------------------------------------------------------------------------------------------------------------------------------------|------|
| Carbon Cycle | Net Land to Atmosphere Flux CH <sub>4</sub>  Earth System Feedbacks Permafrost | MtCH <sub>4</sub> yr <sup>-1</sup> | net flux of CH <sub>4</sub> from the land to the atmosphere (not including AFOLU and other anthropogenic emissions) due to the permafrost feedback. A positive value indicates release of CH <sub>4</sub> from the land, a negative value indicates a net land uptake.                                                                                        | 2    |
| Carbon Cycle | Net Land to Atmosphere Flux CO <sub>2</sub>                                    | MtCO <sub>2</sub> yr <sup>-1</sup> | net flux of CO <sub>2</sub> from the land to the atmosphere (not including AFOLU and other anthropogenic emissions). A positive value indicates release of CO <sub>2</sub> from the land, a negative value indicates a net land uptake.                                                                                                                       | 2    |
| Carbon Cycle | Net Land to Atmosphere Flux CO <sub>2</sub>  Earth System Feedbacks            | MtCO <sub>2</sub> yr <sup>-1</sup> | net flux of CO <sub>2</sub> from the land to the atmosphere (not including AFOLU and other anthropogenic emissions) due to Earth System Feedbacks. A positive value indicates release of CO <sub>2</sub> from the land, a negative value indicates a net land uptake.                                                                                         | 2    |
| Carbon Cycle | Net Land to Atmosphere Flux CO <sub>2</sub>  Earth System Feedbacks Other      | MtCO <sub>2</sub> yr <sup>-1</sup> | net flux of CO <sub>2</sub> from the land to the atmosphere (not including AFOLU and other anthropogenic emissions) due to non-permafrost feedbacks. A positive value indicates release of CO <sub>2</sub> from the land, a negative value indicates a net land uptake. Please specify in a comment on the comments sheet, which feedbacks are included here. | 2    |

**Table S4.** Continued.

| Category     | Variable                                                                       | Unit                               | Definition                                                                                                                                                                                                                                                                       | Tier |
|--------------|--------------------------------------------------------------------------------|------------------------------------|----------------------------------------------------------------------------------------------------------------------------------------------------------------------------------------------------------------------------------------------------------------------------------|------|
| Carbon Cycle | Net Land to Atmosphere Flux CO2 Earth System Feedbacks Permafrost              | MtCO <sub>2</sub> yr <sup>-1</sup> | net flux of CO <sub>2</sub> from the land to the atmosphere (not including AFOLU and other anthropogenic emissions) due to the permafrost feedback. A positive value indicates release of CO <sub>2</sub> from the land, a negative value indicates a net land uptake.           | 2    |
| Carbon Cycle | Net Ocean to Atmosphere Flux CH <sub>4</sub>                                   | MtCH <sub>4</sub> yr <sup>-1</sup> | net flux of CH <sub>4</sub> from the ocean to the atmosphere (not including anthropogenic emissions). A positive value indicates release of CH <sub>4</sub> from the ocean, a negative value indicates a net ocean uptake.                                                       | 2    |
| Carbon Cycle | Net Ocean to Atmosphere Flux CO <sub>2</sub>                                   | MtCO <sub>2</sub> yr <sup>-1</sup> | cumulative net flux of CO <sub>2</sub> from the ocean to the atmosphere (not including anthropogenic emissions). A positive value indicates release of CO <sub>2</sub> from the ocean, a negative value indicates a net ocean uptake.                                            | 2    |
| Carbon Cycle | Cumulative Net Land to Atmosphere Flux CH <sub>4</sub>                         | MtCH <sub>4</sub>                  | cumulative net flux of CH <sub>4</sub> from the land to the atmosphere (not including AFOLU and other anthropogenic emissions). A positive value indicates release of CH <sub>4</sub> from the land, a negative value indicates a net land uptake.                               | 2    |
| Carbon Cycle | Cumulative Net Land to Atmosphere Flux CH <sub>4</sub>  Earth System Feedbacks | MtCH <sub>4</sub>                  | cumulative net flux of CH <sub>4</sub> from the land to the atmosphere (not including AFOLU and other anthropogenic emissions) due to Earth System Feedbacks. A positive value indicates release of CH <sub>4</sub> from the land, a negative value indicates a net land uptake. | 2    |

**Table S4.** Continued.

| Category     | Variable                                                                               | Unit              | Definition                                                                                                                                                                                                                                                                                                                                                               | Tier |
|--------------|----------------------------------------------------------------------------------------|-------------------|--------------------------------------------------------------------------------------------------------------------------------------------------------------------------------------------------------------------------------------------------------------------------------------------------------------------------------------------------------------------------|------|
| Carbon Cycle | Cumulative Net Land to Atmo-<br>sphere Flux CH4 Earth System Feed-<br>backs Other      | MtCH <sub>4</sub> | cumulative net flux of CH <sub>4</sub> from the land to the atmosphere (not including AFOLU and other anthropogenic emissions) due to non-permafrost feedbacks. A positive value indicates release of CH <sub>4</sub> from the land, a negative value indicates a net land uptake. Please specify in a comment on the comments sheet, which feedbacks are included here. | 2    |
| Carbon Cycle | Cumulative Net Land to Atmo-<br>sphere Flux CH4 Earth System Feed-<br>backs Permafrost | MtCH <sub>4</sub> | cumulative net flux of CH <sub>4</sub> from the land to the atmosphere (not including AFOLU and other anthropogenic emissions) due to the permafrost feedback. A positive value indicates release of CH <sub>4</sub> from the land, a negative value indicates a net land uptake.                                                                                        | 2    |
| Carbon Cycle | Cumulative Net Land to Atmosphere<br>Flux CO2                                          | MtCO <sub>2</sub> | cumulative net flux of CO <sub>2</sub> from the land to the atmosphere (not including AFOLU and other anthropogenic emissions). A positive value indicates release of CO <sub>2</sub> from the land, a negative value indicates a net land uptake.                                                                                                                       | 2    |
| Carbon Cycle | Cumulative Net Land to Atmosphere<br>Flux CO2 Earth System Feedbacks                   | MtCO <sub>2</sub> | cumulative net flux of CO <sub>2</sub> from the land to the atmosphere (not including AFOLU and other anthropogenic emissions) due to Earth System Feedbacks. A positive value indicates release of CO <sub>2</sub> from the land, a negative value indicates a net land uptake.                                                                                         | 2    |

Table S4. Continued.

| Category     | Variable                                                                     | Unit              | Definition                                                                                                                                                                                                                                                                                                                                                               | Tier |
|--------------|------------------------------------------------------------------------------|-------------------|--------------------------------------------------------------------------------------------------------------------------------------------------------------------------------------------------------------------------------------------------------------------------------------------------------------------------------------------------------------------------|------|
| Carbon Cycle | Cumulative Net Land to Atmosphere Flux CO2 Earth System Feedbacks Other      | MtCO <sub>2</sub> | cumulative net flux of CO <sub>2</sub> from the land to the atmosphere (not including AFOLU and other anthropogenic emissions) due to non-permafrost feedbacks. A positive value indicates release of CO <sub>2</sub> from the land, a negative value indicates a net land uptake. Please specify in a comment on the comments sheet, which feedbacks are included here. | 2    |
| Carbon Cycle | Cumulative Net Land to Atmosphere Flux CO2 Earth System Feedbacks Permafrost | MtCO <sub>2</sub> | cumulative net flux of CO <sub>2</sub> from the land to the atmosphere (not including AFOLU and other anthropogenic emissions) due to the permafrost feedback. A positive value indicates release of CO <sub>2</sub> from the land, a negative value indicates a net land uptake.                                                                                        | 2    |
| Carbon Cycle | Cumulative Net Ocean to Atmosphere Flux CH <sub>4</sub>                      | MtCH <sub>4</sub> | cumulative net flux of CH <sub>4</sub> from the ocean to the atmosphere (not including anthropogenic emissions). A positive value indicates release of CH <sub>4</sub> from the ocean, a negative value indicates a net ocean uptake.                                                                                                                                    | 2    |
| Carbon Cycle | Cumulative Net Ocean to Atmosphere Flux CO <sub>2</sub>                      | MtCO <sub>2</sub> | cumulative net flux of CO <sub>2</sub> from the ocean to the atmosphere (not including anthropogenic emissions). A positive value indicates release of CO <sub>2</sub> from the ocean, a negative value indicates a net ocean uptake.                                                                                                                                    | 2    |

**Table S4.** Continued.

| Category     | Variable                         | Unit                               | Definition                                                                                                                                                                                                                                          | Tier |
|--------------|----------------------------------|------------------------------------|-----------------------------------------------------------------------------------------------------------------------------------------------------------------------------------------------------------------------------------------------------|------|
| Carbon Cycle | Carbon Pool Atmosphere           | MtCO <sub>2</sub>                  | total amount of CO <sub>2</sub> in the atmospheric carbon pool                                                                                                                                                                                      | 2    |
| Carbon Cycle | Carbon Pool Soil                 | MtCO <sub>2</sub>                  | total amount of CO <sub>2</sub> in the soil carbon pool                                                                                                                                                                                             | 2    |
| Carbon Cycle | Carbon Pool Detritus             | MtCO <sub>2</sub>                  | total amount of CO <sub>2</sub> in the detritus carbon pool                                                                                                                                                                                         | 2    |
| Carbon Cycle | Carbon Pool Plant                | MtCO <sub>2</sub>                  | total amount of CO <sub>2</sub> in the plant carbon pool                                                                                                                                                                                            | 2    |
| Carbon Cycle | Net Primary Productivity         | MtCO <sub>2</sub> yr <sup>-1</sup> | global total net primary productivity                                                                                                                                                                                                               | 2    |
| CCS          | Carbon Sequestration             | MtCO <sub>2</sub> yr <sup>-1</sup> | total carbon dioxide emissions captured and stored                                                                                                                                                                                                  | 1    |
| CCS          | Carbon Sequestration CCS         | MtCO <sub>2</sub> yr <sup>-1</sup> | total carbon dioxide emissions captured and stored in geological deposits (e.g. in depleted oil and gas fields, unmined coal seams, saline aquifers) and the deep ocean, stored amounts should be reported as positive numbers                      | 2    |
| CCS          | Carbon Sequestration CCS Biomass | MtCO <sub>2</sub> yr <sup>-1</sup> | total carbon dioxide emissions captured from bioenergy use and stored in geological deposits (e.g. in depleted oil and gas fields, unmined coal seams, saline aquifers) and the deep ocean, stored amounts should be reported as positive numbers   | 2    |
| CCS          | Carbon Sequestration CCS Fossil  | MtCO <sub>2</sub> yr <sup>-1</sup> | total carbon dioxide emissions captured from fossil fuel use and stored in geological deposits (e.g. in depleted oil and gas fields, unmined coal seams, saline aquifers) and the deep ocean, stored amounts should be reported as positive numbers | 2    |



**Table S4.** Continued.

| Category | Variable                                             | Unit                               | Definition                                                                                                                                                                                                                                                                                                                                                                                                                                                                                  | Tier |
|----------|------------------------------------------------------|------------------------------------|---------------------------------------------------------------------------------------------------------------------------------------------------------------------------------------------------------------------------------------------------------------------------------------------------------------------------------------------------------------------------------------------------------------------------------------------------------------------------------------------|------|
| CCS      | Carbon Sequestration Direct Air Capture              | MtCO <sub>2</sub> yr <sup>-1</sup> | total carbon dioxide sequestered through direct air capture                                                                                                                                                                                                                                                                                                                                                                                                                                 | 2    |
| CCS      | Carbon Sequestration Enhanced Weathering             | MtCO <sub>2</sub> yr <sup>-1</sup> | total carbon dioxide sequestered through enhanced weathering                                                                                                                                                                                                                                                                                                                                                                                                                                | 2    |
| CCS      | Carbon Sequestration Feedstocks                      | MtCO <sub>2</sub> yr <sup>-1</sup> | total carbon dioxide sequestered in feedstocks (e.g., lubricants, asphalt, plastics)                                                                                                                                                                                                                                                                                                                                                                                                        | 2    |
| CCS      | Carbon Sequestration Land Use                        | MtCO <sub>2</sub> yr <sup>-1</sup> | total carbon dioxide sequestered through land-based sinks (e.g., afforestation, soil carbon enhancement, biochar)                                                                                                                                                                                                                                                                                                                                                                           | 2    |
| CCS      | Carbon Sequestration Land Use Afforestation          | MtCO <sub>2</sub> yr <sup>-1</sup> | total carbon dioxide sequestered through afforestation                                                                                                                                                                                                                                                                                                                                                                                                                                      | 2    |
| CCS      | Carbon Sequestration Land Use Biochar                | MtCO <sub>2</sub> yr <sup>-1</sup> | total carbon dioxide sequestered through biochar                                                                                                                                                                                                                                                                                                                                                                                                                                            | 2    |
| CCS      | Carbon Sequestration Land Use Other                  | MtCO <sub>2</sub> yr <sup>-1</sup> | total carbon dioxide sequestered through other land-based mitigation techniques                                                                                                                                                                                                                                                                                                                                                                                                             | 2    |
| CCS      | Carbon Sequestration Land Use Soil Carbon Management | MtCO <sub>2</sub> yr <sup>-1</sup> | total carbon dioxide sequestered through soil carbon management techniques                                                                                                                                                                                                                                                                                                                                                                                                                  | 2    |
| CCS      | Carbon Sequestration Other                           | MtCO <sub>2</sub> yr <sup>-1</sup> | total carbon dioxide sequestered through other techniques (please provide a definition of other sources in this category in the ‘comments’ tab)                                                                                                                                                                                                                                                                                                                                             | 2    |
| Climate  | Airborne Fraction CO <sub>2</sub>                    | Dimensionless                      | fraction of (cumulative) emitted CO <sub>2</sub> which is still in the atmosphere                                                                                                                                                                                                                                                                                                                                                                                                           | 2    |
| Climate  | Effective Climate Sensitivity                        | K                                  | effective climate sensitivity over time, here defined as $ECS_{eff}(t) = \Delta T(t) * RF2x / (RF(t) - dH/dt)$ where $ECS_{eff}$ is effective climate sensitivity, $\Delta T(t)$ is Surface Air Temperature Change, $RF2x$ is radiative forcing due to a doubling of atmospheric CO <sub>2</sub> concentrations, $RF(t)$ is radiative forcing and $dH/dt$ is the energy imbalance at the top of the atmosphere (likely equal to ocean heat uptake in most of our reduced complexity models) | 2    |

**Table S4.** Continued.

| Category | Variable                    | Unit                          | Definition                                                                                                                                                                                                                                                                                                                                                                                                            | Tier |
|----------|-----------------------------|-------------------------------|-----------------------------------------------------------------------------------------------------------------------------------------------------------------------------------------------------------------------------------------------------------------------------------------------------------------------------------------------------------------------------------------------------------------------|------|
| Climate  | Effective Climate Feedback  | $\text{Wm}^{-2}\text{K}^{-1}$ | effective climate feedback over time, here defined as $\lambda_{\text{eff}}(t) = (\text{RF}(t) - dH/dt) / \Delta T(t)$ where $\lambda_{\text{eff}}$ is effective climate feedback, $\Delta T(t)$ is Surface Air Temperature Change, $\text{RF}(t)$ is radiative forcing and $dH/dt$ is the energy imbalance at the top of the atmosphere (likely equal to ocean heat uptake in most of our reduced complexity models) | 2    |
| Climate  | Heat Uptake                 | $\text{ZJyr}^{-1}$            | total Heat Uptake of the Earth System (ZJ is zetta joules i.e. $10^{21}$ J), equivalent to the the energy imbalance at the top of the atmosphere.                                                                                                                                                                                                                                                                     | 1    |
| Climate  | Heat UptakeIce              | $\text{ZJyr}^{-1}$            | ice Heat Uptake (ZJ is zetta joules i.e. $10^{21}$ J)                                                                                                                                                                                                                                                                                                                                                                 | 2    |
| Climate  | Heat UptakeLand             | $\text{ZJyr}^{-1}$            | land Heat Uptake (ZJ is zetta joules i.e. $10^{21}$ J)                                                                                                                                                                                                                                                                                                                                                                | 2    |
| Climate  | Heat UptakeOcean            | $\text{ZJyr}^{-1}$            | ocean Heat Uptake through surface layer of the ocean (ZJ is zetta joules i.e. $10^{21}$ J)                                                                                                                                                                                                                                                                                                                            | 1    |
| Climate  | Heat UptakeOther            | $\text{ZJyr}^{-1}$            | other Heat Uptake (ZJ is zetta joules i.e. $10^{21}$ J). Please specify what "other" is in the Comments sheet.                                                                                                                                                                                                                                                                                                        | 2    |
| Climate  | Heat ContentOcean           | ZJ                            | total ocean heat content                                                                                                                                                                                                                                                                                                                                                                                              | 2    |
| Climate  | Heat ContentOcean 0-700m    | ZJ                            | ocean heat content between 0 and 700m                                                                                                                                                                                                                                                                                                                                                                                 | 2    |
| Climate  | Heat ContentOcean 700-2000m | ZJ                            | ocean heat content between 700 and 2000m                                                                                                                                                                                                                                                                                                                                                                              | 2    |

**Table S4.** Continued.

| Category             | Variable                                              | Unit                | Definition                                                                                                                                                                                                   | Tier |
|----------------------|-------------------------------------------------------|---------------------|--------------------------------------------------------------------------------------------------------------------------------------------------------------------------------------------------------------|------|
| Climate              | Instantaneous TCRE                                    | K/MtCO <sub>2</sub> | warming per unit cumulative CO <sub>2</sub> (this should simply be your 'Surface Air Temperature Change' divided by 'Cumulative Emissions\CO <sub>2</sub> ')                                                 | 2    |
| Climate              | Surface Air Ocean Blended Temperature Change          | K                   | change in blended surface air/ocean temperature (i.e. quantity which is directly comparable with observational datasets e.g. HadCRUT4 or best proxy thereof). Please note reference period in comment sheet. | 2    |
| Climate              | Surface Air Temperature Change                        | K                   | change in surface air temperature (i.e. 2m air temperature or best proxy thereof). Please note reference period in comment sheet.                                                                            | 1    |
| Climate              | Surface Ocean Temperature Change                      | K                   | change in surface layer ocean temperature. Please note reference period in comment sheet.                                                                                                                    | 1    |
| Cumulative Emissions | Cumulative Emissions\CO2                              | MtCO <sub>2</sub>   | cumulative carbon dioxide emissions                                                                                                                                                                          | 1    |
| Cumulative Emissions | Cumulative Emissions\CO2\MAGICC AFOLU                 | MtCO <sub>2</sub>   | cumulative carbon dioxide emissions from agriculture, forestry and other land use (IPCC category 3), excluding any fossil-fuel based emissions in the Agricultural sector (hence not identical to WG3 AFOLU) | 2    |
| Cumulative Emissions | Cumulative Emissions\CO2\MAGICC Fossil and Industrial | MtCO <sub>2</sub>   | cumulative carbon dioxide emissions from energy use on supply and demand side (IPCC category 1A, 1B), industrial processes (IPCC category 2), waste (IPCC category 4) and other (IPCC category 5)            | 2    |
| Cumulative Emissions | Cumulative Emissions\CO2\Other                        | MtCO <sub>2</sub>   | cumulative carbon dioxide emissions from other sources (please provide a definition of other sources in this category in the 'comments' tab)                                                                 | 2    |

**Table S4.** Continued.

| Category                    |     | Variable                                                                                              |           |       | Unit             | Definition                                                                                                                                                                                                    | Tier |
|-----------------------------|-----|-------------------------------------------------------------------------------------------------------|-----------|-------|------------------|---------------------------------------------------------------------------------------------------------------------------------------------------------------------------------------------------------------|------|
| Effective Radiative Forcing | Ra- | Effective Radiative Forcing                                                                           |           |       | $\text{Wm}^{-2}$ | effective radiative forcing from all anthropogenic and natural sources (after stratospheric temperature adjustments and rapid adjustments)                                                                    | 1    |
| Effective Radiative Forcing | Ra- | Effective Forcing Anthropogenic                                                                       | Radiative | Forc- | $\text{Wm}^{-2}$ | effective radiative forcing from all anthropogenic sources (after stratospheric temperature adjustments and rapid adjustments)                                                                                | 1    |
| Effective Radiative Forcing | Ra- | Effective Forcing Anthropogenic Aerosols                                                              | Radiative | Forc- | $\text{Wm}^{-2}$ | effective radiative forcing from aerosols (after stratospheric temperature adjustments and rapid adjustments)                                                                                                 | 1    |
| Effective Radiative Forcing | Ra- | Effective Forcing Anthropogenic Aerosols Aerosols-cloud Interactions                                  | Radiative |       | $\text{Wm}^{-2}$ | effective radiative forcing from indirect effects of aerosols on clouds (after stratospheric temperature adjustments and rapid adjustments)                                                                   | 2    |
| Effective Radiative Forcing | Ra- | Effective Forcing Anthropogenic Aerosols Aerosols-radiation Interactions                              | Radiative |       | $\text{Wm}^{-2}$ | effective radiative forcing from aerosol-radiative effects (after stratospheric temperature adjustments and rapid adjustments), note that the breakdown of this variable can come in multiple different forms | 2    |
| Effective Radiative Forcing | Ra- | Effective Forcing Anthropogenic Aerosols Aerosols-radiation Interactions BC and OC BC                 | Radiative |       | $\text{Wm}^{-2}$ | effective radiative forcing from aerosol-radiative effects from black carbon emissions (after stratospheric temperature adjustments and rapid adjustments)                                                    | 2    |
| Effective Radiative Forcing | Ra- | Effective Forcing Anthropogenic Aerosols Aerosols-radiation Interactions BC and OC BC Biomass Burning | Radiative |       | $\text{Wm}^{-2}$ | effective radiative forcing from aerosol-radiative effects from black carbon biomass burning emissions (after stratospheric temperature adjustments and rapid adjustments)                                    | 2    |

**Table S4.** Continued.

| Category                    | Variable                                                                                                    | Unit                       | Definition                                                                                                                                                                         | Tier |
|-----------------------------|-------------------------------------------------------------------------------------------------------------|----------------------------|------------------------------------------------------------------------------------------------------------------------------------------------------------------------------------|------|
| Effective Radiative Forcing | Effective Forcing Anthropogenic Aerosols Aerosols-radiation Interactions BC and OC BC Fossil and Industrial | Radiative $\text{Wm}^{-2}$ | effective radiative forcing from aerosol-radiative effects from black carbon fossil and industrial emissions (after stratospheric temperature adjustments and rapid adjustments)   | 2    |
| Effective Radiative Forcing | Effective Forcing Anthropogenic Aerosols Aerosols-radiation Interactions BC and OC OC                       | Radiative $\text{Wm}^{-2}$ | effective radiative forcing from aerosol-radiative effects from organic carbon emissions (after stratospheric temperature adjustments and rapid adjustments)                       | 2    |
| Effective Radiative Forcing | Effective Forcing Anthropogenic Aerosols Aerosols-radiation Interactions BC and OC OC Biomass Burning       | Radiative $\text{Wm}^{-2}$ | effective radiative forcing from aerosol-radiative effects from organic carbon biomass burning emissions (after stratospheric temperature adjustments and rapid adjustments)       | 2    |
| Effective Radiative Forcing | Effective Forcing Anthropogenic Aerosols Aerosols-radiation Interactions BC and OC OC Fossil and Industrial | Radiative $\text{Wm}^{-2}$ | effective radiative forcing from aerosol-radiative effects from organic carbon fossil and industrial emissions (after stratospheric temperature adjustments and rapid adjustments) | 2    |
| Effective Radiative Forcing | Effective Forcing Anthropogenic Aerosols Aerosols-radiation Interactions Biomass Burning                    | Radiative $\text{Wm}^{-2}$ | effective radiative forcing from aerosol-radiative effects from biomass burning emissions (after stratospheric temperature adjustments and rapid adjustments)                      | 2    |

**Table S4.** Continued.

| Category                    | Variable                                                                                              | Unit                       | Definition                                                                                                                                                                             | Tier |
|-----------------------------|-------------------------------------------------------------------------------------------------------|----------------------------|----------------------------------------------------------------------------------------------------------------------------------------------------------------------------------------|------|
| Effective Radiative Forcing | Effective Forcing Anthropogenic Aerosols Aerosols-radiation Interactions Biomass Burning BC and OC    | Radiative $\text{Wm}^{-2}$ | effective radiative forcing from aerosol-radiative effects from black and organic carbon biomass burning emissions (after stratospheric temperature adjustments and rapid adjustments) | 2    |
| Effective Radiative Forcing | Effective Forcing Anthropogenic Aerosols Aerosols-radiation Interactions Biomass Burning BC and OC BC | Radiative $\text{Wm}^{-2}$ | effective radiative forcing from aerosol-radiative effects from black carbon biomass burning emissions (after stratospheric temperature adjustments and rapid adjustments)             | 2    |
| Effective Radiative Forcing | Effective Forcing Anthropogenic Aerosols Aerosols-radiation Interactions Biomass Burning BC and OC OC | Radiative $\text{Wm}^{-2}$ | effective radiative forcing from aerosol-radiative effects from organic carbon biomass burning emissions (after stratospheric temperature adjustments and rapid adjustments)           | 2    |
| Effective Radiative Forcing | Effective Forcing Anthropogenic Aerosols Aerosols-radiation Interactions Biomass Burning NH3          | Radiative $\text{Wm}^{-2}$ | effective radiative forcing from aerosol-radiative effects from ammonia biomass burning emissions (after stratospheric temperature adjustments and rapid adjustments)                  | 2    |
| Effective Radiative Forcing | Effective Forcing Anthropogenic Aerosols Aerosols-radiation Interactions Biomass Burning Nitrate      | Radiative $\text{Wm}^{-2}$ | effective radiative forcing from aerosol-radiative effects from nitrate precursor biomass burning emissions (after stratospheric temperature adjustments and rapid adjustments)        | 2    |

**Table S4.** Continued.

| Category                    | Variable                                                                                                    | Unit                       | Definition                                                                                                                                                                                   | Tier |
|-----------------------------|-------------------------------------------------------------------------------------------------------------|----------------------------|----------------------------------------------------------------------------------------------------------------------------------------------------------------------------------------------|------|
| Effective Radiative Forcing | Effective Forcing Anthropogenic Aerosols Aerosols-radiation Interactions Biomass Burning Sulfate            | Radiative $\text{Wm}^{-2}$ | effective radiative forcing from aerosol-radiative effects from sulfate precursor biomass burning emissions (after stratospheric temperature adjustments and rapid adjustments)              | 2    |
| Effective Radiative Forcing | Effective Forcing Anthropogenic Aerosols Aerosols-radiation Interactions Fossil and Industrial              | Radiative $\text{Wm}^{-2}$ | effective radiative forcing from aerosol-radiative effects from fossil and industrial emissions (after stratospheric temperature adjustments and rapid adjustments)                          | 2    |
| Effective Radiative Forcing | Effective Forcing Anthropogenic Aerosols Aerosols-radiation Interactions Fossil and Industrial BC and OC    | Radiative $\text{Wm}^{-2}$ | effective radiative forcing from aerosol-radiative effects from black and organic carbon fossil and industrial emissions (after stratospheric temperature adjustments and rapid adjustments) | 2    |
| Effective Radiative Forcing | Effective Forcing Anthropogenic Aerosols Aerosols-radiation Interactions Fossil and Industrial BC and OC BC | Radiative $\text{Wm}^{-2}$ | effective radiative forcing from aerosol-radiative effects from black carbon fossil and industrial emissions (after stratospheric temperature adjustments and rapid adjustments)             | 2    |
| Effective Radiative Forcing | Effective Forcing Anthropogenic Aerosols Aerosols-radiation Interactions Fossil and Industrial BC and OC OC | Radiative $\text{Wm}^{-2}$ | effective radiative forcing from aerosol-radiative effects from organic carbon fossil and industrial emissions (after stratospheric temperature adjustments and rapid adjustments)           | 2    |

**Table S4.** Continued.

| Category                    | Variable                                                                                               | Unit                       | Definition                                                                                                                                                                            | Tier |
|-----------------------------|--------------------------------------------------------------------------------------------------------|----------------------------|---------------------------------------------------------------------------------------------------------------------------------------------------------------------------------------|------|
| Effective Radiative Forcing | Effective Forcing Anthropogenic Aerosols Aerosols-radiation Interactions Fossil and Industrial NH3     | Radiative $\text{Wm}^{-2}$ | effective radiative forcing from aerosol-radiative effects from ammonia fossil and industrial emissions (after stratospheric temperature adjustments and rapid adjustments)           | 2    |
| Effective Radiative Forcing | Effective Forcing Anthropogenic Aerosols Aerosols-radiation Interactions Fossil and Industrial Nitrate | Radiative $\text{Wm}^{-2}$ | effective radiative forcing from aerosol-radiative effects from nitrate precursor fossil and industrial emissions (after stratospheric temperature adjustments and rapid adjustments) | 2    |
| Effective Radiative Forcing | Effective Forcing Anthropogenic Aerosols Aerosols-radiation Interactions Fossil and Industrial Sulfate | Radiative $\text{Wm}^{-2}$ | effective radiative forcing from aerosol-radiative effects from sulfate precursor fossil and industrial emissions (after stratospheric temperature adjustments and rapid adjustments) | 2    |
| Effective Radiative Forcing | Effective Forcing Anthropogenic Aerosols Aerosols-radiation Interactions Mineral Dust                  | Radiative $\text{Wm}^{-2}$ | effective radiative forcing from aerosol-radiative effects from mineral dust emissions (after stratospheric temperature adjustments and rapid adjustments)                            | 2    |
| Effective Radiative Forcing | Effective Forcing Anthropogenic Aerosols Aerosols-radiation Interactions NH3                           | Radiative $\text{Wm}^{-2}$ | effective radiative forcing from aerosol-radiative effects from ammonia emissions (after stratospheric temperature adjustments and rapid adjustments)                                 | 2    |



Table S4. Continued.

| Category                    | Variable                                                                                               | Unit                       | Definition                                                                                                                                                                      | Tier |
|-----------------------------|--------------------------------------------------------------------------------------------------------|----------------------------|---------------------------------------------------------------------------------------------------------------------------------------------------------------------------------|------|
| Effective Radiative Forcing | Effective Forcing Anthropogenic Aerosols Aerosols-radiation Interactions NH3 Biomass Burning           | Radiative $\text{Wm}^{-2}$ | effective radiative forcing from aerosol-radiative effects from ammonia biomass burning emissions (after stratospheric temperature adjustments and rapid adjustments)           | 2    |
| Effective Radiative Forcing | Effective Forcing Anthropogenic Aerosols Aerosols-radiation Interactions NH3 Fossil and Industrial     | Radiative $\text{Wm}^{-2}$ | effective radiative forcing from aerosol-radiative effects from ammonia fossil and industrial emissions (after stratospheric temperature adjustments and rapid adjustments)     | 2    |
| Effective Radiative Forcing | Effective Forcing Anthropogenic Aerosols Aerosols-radiation Interactions Nitrate                       | Radiative $\text{Wm}^{-2}$ | effective radiative forcing from aerosol-radiative effects from nitrate precursor emissions (after stratospheric temperature adjustments and rapid adjustments)                 | 2    |
| Effective Radiative Forcing | Effective Forcing Anthropogenic Aerosols Aerosols-radiation Interactions Nitrate Biomass Burning       | Radiative $\text{Wm}^{-2}$ | effective radiative forcing from aerosol-radiative effects from nitrate precursor biomass burning emissions (after stratospheric temperature adjustments and rapid adjustments) | 2    |
| Effective Radiative Forcing | Effective Forcing Anthropogenic Aerosols Aerosols-radiation Interactions Nitrate Fossil and Industrial | Radiative $\text{Wm}^{-2}$ | effective radiative forcing from aerosol-radiative effects from nitrate fossil and industrial emissions (after stratospheric temperature adjustments and rapid adjustments)     | 2    |

**Table S4.** Continued.

| Category                    | Variable                                                                                               | Unit                               | Definition                                                                                                                                                                                      | Tier |
|-----------------------------|--------------------------------------------------------------------------------------------------------|------------------------------------|-------------------------------------------------------------------------------------------------------------------------------------------------------------------------------------------------|------|
| Effective Radiative Forcing | Effective Forcing Anthropogenic Aerosols Aerosols-radiation Interactions Other                         | Radiative $\text{Wm}^{-2}$         | effective radiative forcing from aerosol-radiative effects not covered in the other categories (after stratospheric temperature adjustments and rapid adjustments) (please specify in comments) | 2    |
| Effective Radiative Forcing | Effective Forcing Anthropogenic Aerosols Aerosols-radiation Interactions Sulfate                       | Radiative $\text{Wm}^{-2}$         | effective radiative forcing from aerosol-radiative effects from sulfate precursor emissions (after stratospheric temperature adjustments and rapid adjustments)                                 | 2    |
| Effective Radiative Forcing | Effective Forcing Anthropogenic Aerosols Aerosols-radiation Interactions Sulfate Biomass Burning       | Radiative $\text{Wm}^{-2}$         | effective radiative forcing from aerosol-radiative effects from sulfate precursor biomass burning emissions (after stratospheric temperature adjustments and rapid adjustments)                 | 2    |
| Effective Radiative Forcing | Effective Forcing Anthropogenic Aerosols Aerosols-radiation Interactions Sulfate Fossil and Industrial | Radiative $\text{Wm}^{-2}$         | effective radiative forcing from aerosol-radiative effects from sulfate precursor fossil and industrial emissions (after stratospheric temperature adjustments and rapid adjustments)           | 2    |
| Effective Radiative Forcing | Effective Forcing Anthropogenic Albedo Change                                                          | Radiative Forcing $\text{Wm}^{-2}$ | effective radiative forcing from albedo change (after stratospheric temperature adjustments and rapid adjustments)                                                                              | 2    |

**Table S4.** Continued.

| Category                    |     | Variable                    |           | Unit  |                  | Definition                                                                                                                                                                                                | Tier |
|-----------------------------|-----|-----------------------------|-----------|-------|------------------|-----------------------------------------------------------------------------------------------------------------------------------------------------------------------------------------------------------|------|
| Effective Radiative Forcing | Ra- | Effective Radiative Forcing | Radiative | Forc- | $\text{Wm}^{-2}$ | effective radiative forcing (after stratospheric temperature adjustments and rapid adjustments) of $\text{CH}_4$                                                                                          | 2    |
| Effective Radiative Forcing | Ra- | Effective Radiative Forcing | Radiative | Forc- | $\text{Wm}^{-2}$ | effective radiative forcing (after stratospheric temperature adjustments and rapid adjustments) of $\text{CO}_2$                                                                                          | 1    |
| Effective Radiative Forcing | Ra- | Effective Forcing           | Radiative |       | $\text{Wm}^{-2}$ | effective radiative forcing (after stratospheric temperature adjustments and rapid adjustments) of F-gases                                                                                                | 2    |
| Effective Radiative Forcing | Ra- | Effective Forcing           | Radiative |       | $\text{Wm}^{-2}$ | effective radiative forcing (after stratospheric temperature adjustments and rapid adjustments) of hydrofluorocarbons (HFCs, as defined by Table 8.A.1 of AR5) not controlled under the Montreal protocol | 2    |
| Effective Radiative Forcing | Ra- | Effective Forcing           | Radiative |       | $\text{Wm}^{-2}$ | effective radiative forcing (after stratospheric temperature adjustments and rapid adjustments) of HFC125                                                                                                 | 2    |
| Effective Radiative Forcing | Ra- | Effective Forcing           | Radiative |       | $\text{Wm}^{-2}$ | effective radiative forcing (after stratospheric temperature adjustments and rapid adjustments) of HFC134a                                                                                                | 2    |
| Effective Radiative Forcing | Ra- | Effective Forcing           | Radiative |       | $\text{Wm}^{-2}$ | effective radiative forcing (after stratospheric temperature adjustments and rapid adjustments) of HFC143a                                                                                                | 2    |
| Effective Radiative Forcing | Ra- | Effective Forcing           | Radiative |       | $\text{Wm}^{-2}$ | effective radiative forcing (after stratospheric temperature adjustments and rapid adjustments) of HFC152a                                                                                                | 2    |
| Effective Radiative Forcing | Ra- | Effective Forcing           | Radiative |       | $\text{Wm}^{-2}$ | effective radiative forcing (after stratospheric temperature adjustments and rapid adjustments) of HFC227ea                                                                                               | 2    |

**Table S4.** Continued.

| Category                    |  | Variable                                                |           | Unit             | Definition                                                                                                                                                   | Tier |
|-----------------------------|--|---------------------------------------------------------|-----------|------------------|--------------------------------------------------------------------------------------------------------------------------------------------------------------|------|
| Effective Radiative Forcing |  | Effective Forcing Anthropogenic F-Gases HFC HFC23       | Radiative | $\text{Wm}^{-2}$ | effective radiative forcing (after stratospheric temperature adjustments and rapid adjustments) of HFC23                                                     | 2    |
| Effective Radiative Forcing |  | Effective Forcing Anthropogenic F-Gases HFC HFC236fa    | Radiative | $\text{Wm}^{-2}$ | effective radiative forcing (after stratospheric temperature adjustments and rapid adjustments) of HFC236fa                                                  | 2    |
| Effective Radiative Forcing |  | Effective Forcing Anthropogenic F-Gases HFC HFC245fa    | Radiative | $\text{Wm}^{-2}$ | effective radiative forcing (after stratospheric temperature adjustments and rapid adjustments) of HFC245fa                                                  | 2    |
| Effective Radiative Forcing |  | Effective Forcing Anthropogenic F-Gases HFC HFC32       | Radiative | $\text{Wm}^{-2}$ | effective radiative forcing (after stratospheric temperature adjustments and rapid adjustments) of HFC32                                                     | 2    |
| Effective Radiative Forcing |  | Effective Forcing Anthropogenic F-Gases HFC HFC365mfc   | Radiative | $\text{Wm}^{-2}$ | effective radiative forcing (after stratospheric temperature adjustments and rapid adjustments) of HFC365mfc                                                 | 2    |
| Effective Radiative Forcing |  | Effective Forcing Anthropogenic F-Gases HFC HFC43-10mee | Radiative | $\text{Wm}^{-2}$ | effective radiative forcing (after stratospheric temperature adjustments and rapid adjustments) of HFC43-10mee                                               | 2    |
| Effective Radiative Forcing |  | Effective Forcing Anthropogenic F-Gases NF3             | Radiative | $\text{Wm}^{-2}$ | effective radiative forcing (after stratospheric temperature adjustments and rapid adjustments) of nitrogen trifluoride ( $\text{NF}_3$ )                    | 2    |
| Effective Radiative Forcing |  | Effective Forcing Anthropogenic F-Gases PFC             | Radiative | $\text{Wm}^{-2}$ | effective radiative forcing (after stratospheric temperature adjustments and rapid adjustments) of perfluorocarbons (PFCs, as defined by Table 8.A.1 of AR5) | 2    |

**Table S4.** Continued.

| Category                    |           | Variable                                          |           | Unit             | Definition                                                                                                                   | Tier |
|-----------------------------|-----------|---------------------------------------------------|-----------|------------------|------------------------------------------------------------------------------------------------------------------------------|------|
| Effective Radiative Forcing | Radiative | Effective Forcing Anthropogenic F-Gases PFC C2F6  | Radiative | $\text{Wm}^{-2}$ | effective radiative forcing (after stratospheric temperature adjustments and rapid adjustments) of $\text{C}_2\text{F}_6$    | 2    |
| Effective Radiative Forcing | Radiative | Effective Forcing Anthropogenic F-Gases PFC C3F8  | Radiative | $\text{Wm}^{-2}$ | effective radiative forcing (after stratospheric temperature adjustments and rapid adjustments) of $\text{C}_3\text{F}_8$    | 2    |
| Effective Radiative Forcing | Radiative | Effective Forcing Anthropogenic F-Gases PFC C4F10 | Radiative | $\text{Wm}^{-2}$ | effective radiative forcing (after stratospheric temperature adjustments and rapid adjustments) of $\text{C}_4\text{F}_{10}$ | 2    |
| Effective Radiative Forcing | Radiative | Effective Forcing Anthropogenic F-Gases PFC C5F12 | Radiative | $\text{Wm}^{-2}$ | effective radiative forcing (after stratospheric temperature adjustments and rapid adjustments) of $\text{C}_5\text{F}_{12}$ | 2    |
| Effective Radiative Forcing | Radiative | Effective Forcing Anthropogenic F-Gases PFC C6F14 | Radiative | $\text{Wm}^{-2}$ | effective radiative forcing (after stratospheric temperature adjustments and rapid adjustments) of $\text{C}_6\text{F}_{14}$ | 2    |
| Effective Radiative Forcing | Radiative | Effective Forcing Anthropogenic F-Gases PFC C7F16 | Radiative | $\text{Wm}^{-2}$ | effective radiative forcing (after stratospheric temperature adjustments and rapid adjustments) of $\text{C}_7\text{F}_{16}$ | 2    |
| Effective Radiative Forcing | Radiative | Effective Forcing Anthropogenic F-Gases PFC C8F18 | Radiative | $\text{Wm}^{-2}$ | effective radiative forcing (after stratospheric temperature adjustments and rapid adjustments) of $\text{C}_8\text{F}_{18}$ | 2    |
| Effective Radiative Forcing | Radiative | Effective Forcing Anthropogenic F-Gases PFC cC4F8 | Radiative | $\text{Wm}^{-2}$ | effective radiative forcing (after stratospheric temperature adjustments and rapid adjustments) of c- $\text{C}_4\text{F}_8$ | 2    |

**Table S4.** Continued.

| Category                    |  | Variable                                                               |                 | Unit             | Definition                                                                                                                                             | Tier |
|-----------------------------|--|------------------------------------------------------------------------|-----------------|------------------|--------------------------------------------------------------------------------------------------------------------------------------------------------|------|
| Effective Radiative Forcing |  | Effective Forcing Anthropogenic F-Gases PFC CF <sub>4</sub>            | Radiative       | Wm <sup>-2</sup> | effective radiative forcing (after stratospheric temperature adjustments and rapid adjustments) of CF <sub>4</sub>                                     | 2    |
| Effective Radiative Forcing |  | Effective Forcing Anthropogenic F-Gases SF <sub>6</sub>                | Radiative       | Wm <sup>-2</sup> | effective radiative forcing (after stratospheric temperature adjustments and rapid adjustments) of sulfur hexafluoride (SF <sub>6</sub> )              | 2    |
| Effective Radiative Forcing |  | Effective Forcing Anthropogenic F-Gases SO <sub>2</sub> F <sub>2</sub> | Radiative       | Wm <sup>-2</sup> | effective radiative forcing (after stratospheric temperature adjustments and rapid adjustments) of sulfuryl fluoride (SO <sub>2</sub> F <sub>2</sub> ) | 2    |
| Effective Radiative Forcing |  | Effective ing Anthropogenic Montreal Gases                             | Radiative Forc- | Wm <sup>-2</sup> | effective radiative forcing (after stratospheric temperature adjustments and rapid adjustments) of Montreal gases                                      | 2    |
| Effective Radiative Forcing |  | Effective ing Anthropogenic Montreal Gases CCl <sub>4</sub>            | Radiative Forc- | Wm <sup>-2</sup> | effective radiative forcing (after stratospheric temperature adjustments and rapid adjustments) of CCl <sub>4</sub>                                    | 2    |
| Effective Radiative Forcing |  | Effective ing Anthropogenic Montreal Gases CFC                         | Radiative Forc- | Wm <sup>-2</sup> | effective radiative forcing (after stratospheric temperature adjustments and rapid adjustments) of CFC gases (as defined by Table 8.A.1 of AR5)        | 2    |
| Effective Radiative Forcing |  | Effective ing Anthropogenic Montreal Gases CFC CFC11                   | Radiative Forc- | Wm <sup>-2</sup> | effective radiative forcing (after stratospheric temperature adjustments and rapid adjustments) of CFC11                                               | 2    |
| Effective Radiative Forcing |  | Effective ing Anthropogenic Montreal Gases CFC CFC113                  | Radiative Forc- | Wm <sup>-2</sup> | effective radiative forcing (after stratospheric temperature adjustments and rapid adjustments) of CFC113                                              | 2    |

**Table S4.** Continued.

| Category                    |     | Variable                    |           | Unit  |                  | Definition                                                                                                                   | Tier |
|-----------------------------|-----|-----------------------------|-----------|-------|------------------|------------------------------------------------------------------------------------------------------------------------------|------|
| Effective Radiative Forcing | Ra- | Effective Radiative Forcing | Radiative | Forc- | $\text{Wm}^{-2}$ | effective radiative forcing (after stratospheric temperature adjustments and rapid adjustments) of CFC114                    | 2    |
| Effective Radiative Forcing | Ra- | Effective Radiative Forcing | Radiative | Forc- | $\text{Wm}^{-2}$ | effective radiative forcing (after stratospheric temperature adjustments and rapid adjustments) of CFC115                    | 2    |
| Effective Radiative Forcing | Ra- | Effective Radiative Forcing | Radiative | Forc- | $\text{Wm}^{-2}$ | effective radiative forcing (after stratospheric temperature adjustments and rapid adjustments) of CFC12                     | 2    |
| Effective Radiative Forcing | Ra- | Effective Radiative Forcing | Radiative | Forc- | $\text{Wm}^{-2}$ | effective radiative forcing (after stratospheric temperature adjustments and rapid adjustments) of $\text{CH}_2\text{Cl}_2$  | 2    |
| Effective Radiative Forcing | Ra- | Effective Radiative Forcing | Radiative | Forc- | $\text{Wm}^{-2}$ | effective radiative forcing (after stratospheric temperature adjustments and rapid adjustments) of $\text{CH}_3\text{Br}$    | 2    |
| Effective Radiative Forcing | Ra- | Effective Radiative Forcing | Radiative | Forc- | $\text{Wm}^{-2}$ | effective radiative forcing (after stratospheric temperature adjustments and rapid adjustments) of $\text{CH}_3\text{CCl}_3$ | 2    |
| Effective Radiative Forcing | Ra- | Effective Radiative Forcing | Radiative | Forc- | $\text{Wm}^{-2}$ | effective radiative forcing (after stratospheric temperature adjustments and rapid adjustments) of $\text{CH}_3\text{Cl}$    | 2    |

**Table S4.** Continued.

| Category                    |                   | Variable                    |                              | Unit              |                  | Definition                                                                                                           | Tier |
|-----------------------------|-------------------|-----------------------------|------------------------------|-------------------|------------------|----------------------------------------------------------------------------------------------------------------------|------|
| Effective Radiative Forcing | Radiative Forcing | Effective Radiative Forcing | Anthropogenic Montreal Gases | CHCl <sub>3</sub> | Wm <sup>-2</sup> | effective radiative forcing (after stratospheric temperature adjustments and rapid adjustments) of CHCl <sub>3</sub> | 2    |
| Effective Radiative Forcing | Radiative Forcing | Effective Radiative Forcing | Anthropogenic Montreal Gases | Halon1202         | Wm <sup>-2</sup> | effective radiative forcing (after stratospheric temperature adjustments and rapid adjustments) of Halon-1202        | 2    |
| Effective Radiative Forcing | Radiative Forcing | Effective Radiative Forcing | Anthropogenic Montreal Gases | Halon1211         | Wm <sup>-2</sup> | effective radiative forcing (after stratospheric temperature adjustments and rapid adjustments) of Halon-1211        | 2    |
| Effective Radiative Forcing | Radiative Forcing | Effective Radiative Forcing | Anthropogenic Montreal Gases | Halon1301         | Wm <sup>-2</sup> | effective radiative forcing (after stratospheric temperature adjustments and rapid adjustments) of Halon-1301        | 2    |
| Effective Radiative Forcing | Radiative Forcing | Effective Radiative Forcing | Anthropogenic Montreal Gases | Halon2402         | Wm <sup>-2</sup> | effective radiative forcing (after stratospheric temperature adjustments and rapid adjustments) of Halon-2402        | 2    |
| Effective Radiative Forcing | Radiative Forcing | Effective Radiative Forcing | Anthropogenic Montreal Gases | HCFC141b          | Wm <sup>-2</sup> | effective radiative forcing (after stratospheric temperature adjustments and rapid adjustments) of HCFC141b          | 2    |
| Effective Radiative Forcing | Radiative Forcing | Effective Radiative Forcing | Anthropogenic Montreal Gases | HCFC142b          | Wm <sup>-2</sup> | effective radiative forcing (after stratospheric temperature adjustments and rapid adjustments) of HCFC22            | 2    |



Table S4. Continued.

| Category                    |                   | Variable                    |                              | Unit                |                                       | Definition                                                                                                                                   | Tier                                                                                                                                        |   |
|-----------------------------|-------------------|-----------------------------|------------------------------|---------------------|---------------------------------------|----------------------------------------------------------------------------------------------------------------------------------------------|---------------------------------------------------------------------------------------------------------------------------------------------|---|
| Effective Radiative Forcing | Radiative Forcing | Effective Radiative Forcing | Anthropogenic Montreal Gases | HCFC22              | $\text{Wm}^{-2}$                      | effective radiative forcing (after stratospheric temperature adjustments and rapid adjustments) of HCFC22                                    | 2                                                                                                                                           |   |
| Effective Radiative Forcing | Radiative Forcing | Effective Radiative Forcing | Anthropogenic                | N2O                 | $\text{Wm}^{-2}$                      | effective radiative forcing (after stratospheric temperature adjustments and rapid adjustments) of N2O                                       | 2                                                                                                                                           |   |
| Effective Radiative Forcing | Radiative Forcing | Effective Radiative Forcing | Anthropogenic                | Other               | $\text{Wm}^{-2}$                      | effective radiative forcing from factors not covered in other categories (after stratospheric temperature adjustments and rapid adjustments) | 2                                                                                                                                           |   |
| Effective Radiative Forcing | Radiative Forcing | Effective Radiative Forcing | Anthropogenic                | Other               | BC Snow                               | $\text{Wm}^{-2}$                                                                                                                             | effective radiative forcing from black carbon on snow (after stratospheric temperature adjustments and rapid adjustments)                   | 2 |
| Effective Radiative Forcing | Radiative Forcing | Effective Radiative Forcing | Anthropogenic                | Other               | Contrails and Contrail-induced Cirrus | $\text{Wm}^{-2}$                                                                                                                             | effective radiative forcing from contrails and contrail-induced cirrus (after stratospheric temperature adjustments and rapid adjustments)  | 2 |
| Effective Radiative Forcing | Radiative Forcing | Effective Radiative Forcing | Anthropogenic                | Other               | CH4 Oxidation Stratospheric H2O       | $\text{Wm}^{-2}$                                                                                                                             | effective radiative forcing from methane oxidation of stratospheric H2O (after stratospheric temperature adjustments and rapid adjustments) | 2 |
| Effective Radiative Forcing | Radiative Forcing | Effective Radiative Forcing | Anthropogenic                | Other               | Other WMGHGs                          | $\text{Wm}^{-2}$                                                                                                                             | effective radiative forcing from WMGHG not covered in other categories (after stratospheric temperature adjustments and rapid adjustments)  | 2 |
| Effective Radiative Forcing | Radiative Forcing | Effective Radiative Forcing | Anthropogenic                | Stratospheric Ozone | $\text{Wm}^{-2}$                      | effective radiative forcing from stratospheric ozone (after stratospheric temperature adjustments and rapid adjustments)                     | 2                                                                                                                                           |   |

**Table S4.** Continued.

| Category                    |     | Variable                                                     |       | Unit                          |  | Definition                                                                                                                                                                                      | Tier |
|-----------------------------|-----|--------------------------------------------------------------|-------|-------------------------------|--|-------------------------------------------------------------------------------------------------------------------------------------------------------------------------------------------------|------|
| Effective Radiative Forcing | Ra- | Effective Radiative Forcing Anthropogenic Tropospheric Ozone | Forc- | $\text{Wm}^{-2}$              |  | effective radiative forcing from tropospheric ozone (after stratospheric temperature adjustments and rapid adjustments)                                                                         | 2    |
| Effective Radiative Forcing | Ra- | Effective Radiative Forcing Natural                          |       | $\text{Wm}^{-2}$              |  | effective radiative forcing from all natural drivers, i.e. solar and volcanic forcing (after stratospheric temperature adjustments and rapid adjustments)                                       | 2    |
| Effective Radiative Forcing | Ra- | Effective Radiative Forcing Natural Solar                    |       | $\text{Wm}^{-2}$              |  | effective radiative forcing from variations in solar irradiance (after stratospheric temperature adjustments and rapid adjustments)                                                             | 2    |
| Effective Radiative Forcing | Ra- | Effective Radiative Forcing Natural Volcanic                 |       | $\text{Wm}^{-2}$              |  | effective radiative forcing due to volcanic eruptions (after stratospheric temperature adjustments and rapid adjustments)                                                                       | 2    |
| Emissions                   |     | Emissions BC                                                 |       | $\text{MtBCyr}^{-1}$          |  | total black carbon emissions                                                                                                                                                                    | 1    |
| Emissions                   |     | Emissions BC MAGICC AFOLU                                    |       | $\text{MtBCyr}^{-1}$          |  | black carbon emissions from agriculture, forestry and other land use (IPCC category 3), excluding any fossil-fuel based emissions in the Agricultural sector (hence not identical to WG3 AFOLU) | 2    |
| Emissions                   |     | Emissions BC MAGICC Fossil and Industrial                    |       | $\text{MtBCyr}^{-1}$          |  | black carbon emissions from energy use on supply and demand side (IPCC category 1A, 1B), industrial processes (IPCC category 2), waste (IPCC category 4) and other (IPCC category 5)            | 2    |
| Emissions                   |     | Emissions BC Other                                           |       | $\text{MtBCyr}^{-1}$          |  | black carbon emissions from other sources (please provide a definition of other sources in this category in the ‘comments’ tab)                                                                 | 2    |
| Emissions                   |     | Emissions CH4                                                |       | $\text{MtCH}_4\text{yr}^{-1}$ |  | total methane emissions                                                                                                                                                                         | 1    |
| Emissions                   |     | Emissions CH4 MAGICC AFOLU                                   |       | $\text{MtCH}_4\text{yr}^{-1}$ |  | methane emissions from agriculture, forestry and other land use (IPCC category 3), excluding any fossil-fuel based emissions in the Agricultural sector (hence not identical to WG3 AFOLU)      | 2    |

**Table S4.** Continued.

| Category  | Variable                                   | Unit                               | Definition                                                                                                                                                                                         | Tier |
|-----------|--------------------------------------------|------------------------------------|----------------------------------------------------------------------------------------------------------------------------------------------------------------------------------------------------|------|
| Emissions | Emissions CH4 MAGICC Fossil and Industrial | MtCH <sub>4</sub> yr <sup>-1</sup> | methane emissions from energy use on supply and demand side (IPCC category 1A, 1B), industrial processes (IPCC category 2), waste (IPCC category 4) and other (IPCC category 5)                    | 2    |
| Emissions | Emissions CH4 Other                        | MtCH <sub>4</sub> yr <sup>-1</sup> | methane emissions from other sources (please provide a definition of other sources in this category in the 'comments' tab)                                                                         | 2    |
| Emissions | Emissions CO                               | MtCO <sub>yr</sub> <sup>-1</sup>   | total carbon monoxide emissions                                                                                                                                                                    | 1    |
| Emissions | Emissions CO MAGICC AFOLU                  | MtCO <sub>yr</sub> <sup>-1</sup>   | carbon monoxide emissions from agriculture, forestry and other land use (IPCC category 3), excluding any fossil-fuel based emissions in the Agricultural sector (hence not identical to WG3 AFOLU) | 2    |
| Emissions | Emissions CO MAGICC Fossil and Industrial  | MtCO <sub>yr</sub> <sup>-1</sup>   | carbon monoxide emissions from energy use on supply and demand side (IPCC category 1A, 1B), industrial processes (IPCC category 2), waste (IPCC category 4) and other (IPCC category 5)            | 2    |
| Emissions | Emissions CO Other                         | MtCO <sub>yr</sub> <sup>-1</sup>   | carbon monoxide emissions from other sources (please provide a definition of other sources in this category in the 'comments' tab)                                                                 | 2    |
| Emissions | Emissions CO <sub>2</sub>                  | MtCO <sub>2</sub> yr <sup>-1</sup> | total carbon dioxide emissions                                                                                                                                                                     | 1    |
| Emissions | Emissions CO <sub>2</sub>  MAGICC AFOLU    | MtCO <sub>2</sub> yr <sup>-1</sup> | carbon dioxide emissions from agriculture, forestry and other land use (IPCC category 3), excluding any fossil-fuel based emissions in the Agricultural sector (hence not identical to WG3 AFOLU)  | 2    |

**Table S4.** Continued.

| Category  | Variable                                  | Unit                               | Definition                                                                                                                                                                                                                | Tier |
|-----------|-------------------------------------------|------------------------------------|---------------------------------------------------------------------------------------------------------------------------------------------------------------------------------------------------------------------------|------|
| Emissions | EmissionsCO2 MAGICC Fossil and Industrial | MtCO <sub>2</sub> yr <sup>-1</sup> | carbon dioxide emissions from energy use on supply and demand side (IPCC category 1A, 1B), industrial processes (IPCC category 2), waste (IPCC category 4) and other (IPCC category 5)                                    | 2    |
| Emissions | EmissionsCO2 Other                        | MtCO <sub>2</sub> yr <sup>-1</sup> | carbon dioxide emissions from other sources (please provide a definition of other sources in this category in the ‘comments’ tab)                                                                                         | 2    |
| Emissions | Emissions F-Gases                         | MtCO <sub>2</sub> yr <sup>-1</sup> | total F-gas emissions, including sulfur hexafluoride (SF <sub>6</sub> ), nitrogen trifluoride (NF <sub>3</sub> ), sulfuryl fluoride (SO <sub>2</sub> F <sub>2</sub> ), hydrofluorocarbons (HFCs), perfluorocarbons (PFCs) | 3    |
| Emissions | Emissions F-Gases HFC                     | MtCO <sub>2</sub> yr <sup>-1</sup> | equivalent species total emissions of hydrofluorocarbons (HFCs and HCFCs), provided as aggregate CO <sub>2</sub> -equivalents                                                                                             | 3    |
| Emissions | Emissions F-Gases HFC HFC125              | ktHFC125yr <sup>-1</sup>           | total emissions of HFC125                                                                                                                                                                                                 | 2    |
| Emissions | Emissions F-Gases HFC HFC134a             | ktHFC134ayr <sup>-1</sup>          | total emissions of HFC134a                                                                                                                                                                                                | 2    |
| Emissions | Emissions F-Gases HFC HFC143a             | ktHFC143ayr <sup>-1</sup>          | total emissions of HFC143a                                                                                                                                                                                                | 2    |
| Emissions | Emissions F-Gases HFC HFC152a             | ktHFC152ayr <sup>-1</sup>          | total emissions of HFC152a                                                                                                                                                                                                | 2    |
| Emissions | Emissions F-Gases HFC HFC227ea            | ktHFC227eayr <sup>-1</sup>         | total emissions of HFC227ea                                                                                                                                                                                               | 2    |
| Emissions | Emissions F-Gases HFC HFC23               | ktHFC23yr <sup>-1</sup>            | total emissions of HFC23                                                                                                                                                                                                  | 2    |
| Emissions | Emissions F-Gases HFC HFC236fa            | ktHFC236fayr <sup>-1</sup>         | total emissions of HFC236fa                                                                                                                                                                                               | 2    |
| Emissions | Emissions F-Gases HFC HFC245fa            | ktHFC245fayr <sup>-1</sup>         | total emissions of HFC245fa                                                                                                                                                                                               | 2    |
| Emissions | Emissions F-Gases HFC HFC32               | ktHFC32yr <sup>-1</sup>            | total emissions of HFC32                                                                                                                                                                                                  | 2    |
| Emissions | Emissions F-Gases HFC HFC365mfc           | ktHFC365mfeyr <sup>-1</sup>        | total emissions of HFC365mfc                                                                                                                                                                                              | 2    |
| Emissions | Emissions F-Gases HFC HFC4310mee          | ktHFC4310meeyr <sup>-1</sup>       | total emissions of HFC43-10mee                                                                                                                                                                                            | 2    |
| Emissions | Emissions F-Gases NF3                     | ktNF <sub>3</sub> yr <sup>-1</sup> | total emissions of nitrogen trifluoride (NF <sub>3</sub> )                                                                                                                                                                | 2    |
| Emissions | Emissions F-Gases PFC                     | ktCF <sub>4</sub> yr <sup>-1</sup> | equivalent species total emissions of perfluorocarbons (PFCs, as defined by Table 8.A.1 of AR5), provided as aggregate CF <sub>4</sub> -equivalents                                                                       | 3    |

**Table S4.** Continued.

| Category  | Variable                            | Unit                                              | Definition                                                                      | Tier |
|-----------|-------------------------------------|---------------------------------------------------|---------------------------------------------------------------------------------|------|
| Emissions | Emissions\F-Gases\PFClC2F6          | ktC <sub>2</sub> F <sub>6</sub> yr <sup>-1</sup>  | total emissions of C <sub>2</sub> F <sub>6</sub>                                | 2    |
| Emissions | Emissions\F-Gases\PFClC3F8          | ktC <sub>3</sub> F <sub>8</sub> yr <sup>-1</sup>  | total emissions of C <sub>3</sub> F <sub>8</sub>                                | 2    |
| Emissions | Emissions\F-Gases\PFClC4F10         | ktC <sub>4</sub> F <sub>10</sub> yr <sup>-1</sup> | total emissions of C <sub>4</sub> F <sub>10</sub>                               | 2    |
| Emissions | Emissions\F-Gases\PFClC5F12         | ktC <sub>5</sub> F <sub>12</sub> yr <sup>-1</sup> | total emissions of C <sub>5</sub> F <sub>12</sub>                               | 2    |
| Emissions | Emissions\F-Gases\PFClC6F14         | ktC <sub>6</sub> F <sub>14</sub> yr <sup>-1</sup> | total emissions of C <sub>6</sub> F <sub>14</sub>                               | 2    |
| Emissions | Emissions\F-Gases\PFClC7F16         | ktC <sub>7</sub> F <sub>16</sub> yr <sup>-1</sup> | total emissions of C <sub>7</sub> F <sub>16</sub>                               | 2    |
| Emissions | Emissions\F-Gases\PFClC8F18         | ktC <sub>8</sub> F <sub>18</sub> yr <sup>-1</sup> | total emissions of C <sub>8</sub> F <sub>18</sub>                               | 2    |
| Emissions | Emissions\F-Gases\PFClcC4F8         | ktcC <sub>4</sub> F <sub>8</sub> yr <sup>-1</sup> | total emissions of c-C <sub>4</sub> F <sub>8</sub>                              | 2    |
| Emissions | Emissions\F-Gases\PFClCF4           | ktCF <sub>4</sub> yr <sup>-1</sup>                | total emissions of CF <sub>4</sub>                                              | 2    |
| Emissions | Emissions\F-Gases\SF6               | ktSF <sub>6</sub> yr <sup>-1</sup>                | total emissions of sulfur hexafluoride (SF <sub>6</sub> )                       | 2    |
| Emissions | Emissions\F-Gases\SO2F2             | ktSO <sub>2</sub> F <sub>2</sub> yr <sup>-1</sup> | total emissions of sulfuryl fluoride (SO <sub>2</sub> F <sub>2</sub> )          | 2    |
| Emissions | Emissions\Montreal Gases            | MtCO <sub>2</sub> yr <sup>-1</sup>                | equivalent species total Montreal gas emissions, provided as CFC-11 equivalents | 3    |
| Emissions | Emissions\Montreal Gases\CCl4       | ktCCl <sub>4</sub> yr <sup>-1</sup>               | total emissions of CCl <sub>4</sub>                                             | 2    |
| Emissions | Emissions\Montreal Gases\CFC        | MtCO <sub>2</sub> yr <sup>-1</sup>                | equivalent species total CFC emissions, provided as CFC-11 equivalents          | 3    |
| Emissions | Emissions\Montreal Gases\CFC\CFC11  | ktCFC11yr <sup>-1</sup>                           | total emissions of CFC11                                                        | 2    |
| Emissions | Emissions\Montreal Gases\CFC\CFC113 | ktCFC113yr <sup>-1</sup>                          | total emissions of CFC113                                                       | 2    |
| Emissions | Emissions\Montreal Gases\CFC\CFC114 | ktCFC114yr <sup>-1</sup>                          | total emissions of CFC114                                                       | 2    |

**Table S4.** Continued.

| Category  | Variable                            | Unit                                                | Definition                                          | Tier |
|-----------|-------------------------------------|-----------------------------------------------------|-----------------------------------------------------|------|
| Emissions | Emissions\Montreal Gases\CFC\CFC115 | ktCFC115yr <sup>-1</sup>                            | total emissions of CFC115                           | 2    |
| Emissions | Emissions\Montreal Gases\CFC\CFC12  | ktCFC12yr <sup>-1</sup>                             | total emissions of CFC12                            | 2    |
| Emissions | Emissions\Montreal Gases\CH2Cl2     | ktCH <sub>2</sub> Cl <sub>2</sub> yr <sup>-1</sup>  | total emissions of CH <sub>2</sub> Cl <sub>2</sub>  | 2    |
| Emissions | Emissions\Montreal Gases\CH3Br      | ktCH <sub>3</sub> Br yr <sup>-1</sup>               | total emissions of CH <sub>3</sub> Br               | 2    |
| Emissions | Emissions\Montreal Gases\CH3CCl3    | ktCH <sub>3</sub> CCl <sub>3</sub> yr <sup>-1</sup> | total emissions of CH <sub>3</sub> CCl <sub>3</sub> | 2    |
| Emissions | Emissions\Montreal Gases\CH3Cl      | ktCH <sub>3</sub> Cl yr <sup>-1</sup>               | total emissions of CH <sub>3</sub> Cl               | 2    |
| Emissions | Emissions\Montreal Gases\CHCl3      | ktCHCl <sub>3</sub> yr <sup>-1</sup>                | total emissions of CHCl <sub>3</sub>                | 2    |
| Emissions | Emissions\Montreal Gases\Halon1202  | ktHalon1202yr <sup>-1</sup>                         | total emissions of Halon-1202                       | 2    |
| Emissions | Emissions\Montreal Gases\Halon1211  | ktHalon1211yr <sup>-1</sup>                         | total emissions of Halon-1211                       | 2    |
| Emissions | Emissions\Montreal Gases\Halon1301  | ktHalon1301yr <sup>-1</sup>                         | total emissions of Halon-1301                       | 2    |
| Emissions | Emissions\Montreal Gases\Halon2402  | ktHalon2402yr <sup>-1</sup>                         | total emissions of Halon-2402                       | 2    |
| Emissions | Emissions\Montreal Gases\HCFC141b   | ktHCFC141byr <sup>-1</sup>                          | total emissions of HCFC141b                         | 2    |
| Emissions | Emissions\Montreal Gases\HCFC142b   | ktHCFC142byr <sup>-1</sup>                          | total emissions of HCFC22                           | 2    |
| Emissions | Emissions\Montreal Gases\HCFC22     | ktHCFC22yr <sup>-1</sup>                            | total emissions of HCFC22                           | 2    |

**Table S4.** Continued.

| Category  | Variable                                   | Unit                               | Definition                                                                                                                                                                                  | Tier |
|-----------|--------------------------------------------|------------------------------------|---------------------------------------------------------------------------------------------------------------------------------------------------------------------------------------------|------|
| Emissions | Emissions N2O                              | ktN <sub>2</sub> Oyr <sup>-1</sup> | total nitrogen emissions                                                                                                                                                                    | 1    |
| Emissions | Emissions N2O MAGICC AFOLU                 | ktN <sub>2</sub> Oyr <sup>-1</sup> | nitrogen emissions from agriculture, forestry and other land use (IPCC category 3), excluding any fossil-fuel based emissions in the Agricultural sector (hence not identical to WG3 AFOLU) | 2    |
| Emissions | Emissions N2O MAGICC Fossil and Industrial | ktN <sub>2</sub> Oyr <sup>-1</sup> | nitrogen emissions from energy use on supply and demand side (IPCC category 1A, 1B), industrial processes (IPCC category 2), waste (IPCC category 4) and other (IPCC category 5)            | 2    |
| Emissions | Emissions N2O Other                        | ktN <sub>2</sub> Oyr <sup>-1</sup> | nitrogen emissions from other sources (please provide a definition of other sources in this category in the 'comments' tab)                                                                 | 2    |
| Emissions | Emissions NH3                              | MtNH <sub>3</sub> yr <sup>-1</sup> | total ammonia emissions                                                                                                                                                                     | 1    |
| Emissions | Emissions NH3 MAGICC AFOLU                 | MtNH <sub>3</sub> yr <sup>-1</sup> | ammonia emissions from agriculture, forestry and other land use (IPCC category 3), excluding any fossil-fuel based emissions in the Agricultural sector (hence not identical to WG3 AFOLU)  | 2    |
| Emissions | Emissions NH3 MAGICC Fossil and Industrial | MtNH <sub>3</sub> yr <sup>-1</sup> | ammonia emissions from energy use on supply and demand side (IPCC category 1A, 1B), industrial processes (IPCC category 2), waste (IPCC category 4) and other (IPCC category 5)             | 2    |
| Emissions | Emissions NH3 Other                        | MtNH <sub>3</sub> yr <sup>-1</sup> | ammonia emissions from other sources (please provide a definition of other sources in this category in the 'comments' tab)                                                                  | 2    |

**Table S4.** Continued.

| Category  | Variable                                   | Unit                               | Definition                                                                                                                                                                                        | Tier |
|-----------|--------------------------------------------|------------------------------------|---------------------------------------------------------------------------------------------------------------------------------------------------------------------------------------------------|------|
| Emissions | Emissions\NOx                              | MtNO <sub>x</sub> yr <sup>-1</sup> | total nitrous oxide emissions                                                                                                                                                                     | 1    |
| Emissions | Emissions\NOx\MAGICC AFOLU                 | MtNO <sub>x</sub> yr <sup>-1</sup> | nitrous oxide emissions from agriculture, forestry and other land use (IPCC category 3), excluding any fossil-fuel based emissions in the Agricultural sector (hence not identical to WG3 AFOLU)  | 2    |
| Emissions | Emissions\NOx\MAGICC Fossil and Industrial | MtNO <sub>x</sub> yr <sup>-1</sup> | nitrous oxide emissions from energy use on supply and demand side (IPCC category 1A, 1B), industrial processes (IPCC category 2), waste (IPCC category 4) and other (IPCC category 5)             | 2    |
| Emissions | Emissions\NOx\Other                        | MtNO <sub>x</sub> yr <sup>-1</sup> | nitrous oxide emissions from other sources (please provide a definition of other sources in this category in the ‘comments’ tab)                                                                  | 2    |
| Emissions | Emissions\OC                               | MtOCyr <sup>-1</sup>               | total organic carbon emissions                                                                                                                                                                    | 1    |
| Emissions | Emissions\OC\MAGICC AFOLU                  | MtOCyr <sup>-1</sup>               | organic carbon emissions from agriculture, forestry and other land use (IPCC category 3), excluding any fossil-fuel based emissions in the Agricultural sector (hence not identical to WG3 AFOLU) | 2    |
| Emissions | Emissions\OC\MAGICC Fossil and Industrial  | MtOCyr <sup>-1</sup>               | organic carbon emissions from energy use on supply and demand side (IPCC category 1A, 1B), industrial processes (IPCC category 2), waste (IPCC category 4) and other (IPCC category 5)            | 2    |
| Emissions | Emissions\OC\Other                         | MtOCyr <sup>-1</sup>               | organic carbon emissions from other sources (please provide a definition of other sources in this category in the ‘comments’ tab)                                                                 | 2    |



**Table S4.** Continued.

| Category  | Variable                                      | Unit                               | Definition                                                                                                                                                                                                                  | Tier |
|-----------|-----------------------------------------------|------------------------------------|-----------------------------------------------------------------------------------------------------------------------------------------------------------------------------------------------------------------------------|------|
| Emissions | Emissions\Sulfur                              | MtSO <sub>2</sub> yr <sup>-1</sup> | total sulfur (as a precursor for sulfates) emissions                                                                                                                                                                        | 1    |
| Emissions | Emissions\Sulfur\MAGICC AFOLU                 | MtSO <sub>2</sub> yr <sup>-1</sup> | sulfur (as a precursor for sulfates) emissions from agriculture, forestry and other land use (IPCC category 3), excluding any fossil-fuel based emissions in the Agricultural sector (hence not identical to WG3 AFOLU)     | 2    |
| Emissions | Emissions\Sulfur\MAGICC Fossil and Industrial | MtSO <sub>2</sub> yr <sup>-1</sup> | sulfur (as a precursor for sulfates) emissions from energy use on supply and demand side (IPCC category 1A, 1B), industrial processes (IPCC category 2), waste (IPCC category 4) and other (IPCC category 5)                | 2    |
| Emissions | Emissions\Sulfur\Other                        | MtSO <sub>2</sub> yr <sup>-1</sup> | sulfur (as a precursor for sulfates) emissions from other sources (please provide a definition of other sources in this category in the 'comments' tab)                                                                     | 2    |
| Emissions | Emissions\VOC                                 | MtVOCyr <sup>-1</sup>              | total (non-methane) volatile organic compounds emissions                                                                                                                                                                    | 1    |
| Emissions | Emissions\VOC\MAGICC AFOLU                    | MtVOCyr <sup>-1</sup>              | (non-methane) volatile organic compounds emissions from agriculture, forestry and other land use (IPCC category 3), excluding any fossil-fuel based emissions in the Agricultural sector (hence not identical to WG3 AFOLU) | 2    |
| Emissions | Emissions\VOC\MAGICC Fossil and Industrial    | MtVOCyr <sup>-1</sup>              | (non-methane) volatile organic compounds emissions from energy use on supply and demand side (IPCC category 1A, 1B), industrial processes (IPCC category 2), waste (IPCC category 4) and other (IPCC category 5)            | 2    |

**Table S4.** Continued.

| Category          | Variable                                                                                              | Unit                  | Definition                                                                                                                                                                    | Tier |
|-------------------|-------------------------------------------------------------------------------------------------------|-----------------------|-------------------------------------------------------------------------------------------------------------------------------------------------------------------------------|------|
| Emissions         | Emissions VOC Other                                                                                   | MtVOCyr <sup>-1</sup> | (non-methane) volatile organic compounds emissions from other sources (please provide a definition of other sources in this category in the ‘comments’ tab)                   | 2    |
| Methane Cycle     | Atmospheric Lifetime CH <sub>4</sub>                                                                  | yr                    | total atmospheric lifetime of methane                                                                                                                                         | 3    |
| Nitrogen Cycle    | Atmospheric Lifetime N <sub>2</sub> O                                                                 | yr                    | total atmospheric lifetime of nitrogen                                                                                                                                        | 3    |
| Ocean             | Ocean pH                                                                                              | Dimensionless         | pH of the ocean’s surface layer                                                                                                                                               | 3    |
| Radiative Forcing | Radiative Forcing                                                                                     | Wm <sup>-2</sup>      | radiative forcing from all anthropogenic and natural sources (after stratospheric temperature adjustments)                                                                    | 1    |
| Radiative Forcing | Radiative Forcing Anthropogenic                                                                       | Wm <sup>-2</sup>      | radiative forcing from all anthropogenic sources (after stratospheric temperature adjustments)                                                                                | 1    |
| Radiative Forcing | Radiative Forcing Anthropogenic Aerosols                                                              | Wm <sup>-2</sup>      | radiative forcing from aerosols (after stratospheric temperature adjustments)                                                                                                 | 1    |
| Radiative Forcing | Radiative Forcing Anthropogenic Aerosols Aerosols-cloud Interactions                                  | Wm <sup>-2</sup>      | radiative forcing from indirect effects of aerosols on clouds (after stratospheric temperature adjustments)                                                                   | 2    |
| Radiative Forcing | Radiative Forcing Anthropogenic Aerosols Aerosols-radiation Interactions                              | Wm <sup>-2</sup>      | radiative forcing from aerosol-radiative effects (after stratospheric temperature adjustments), note that the breakdown of this variable can come in multiple different forms | 2    |
| Radiative Forcing | Radiative Forcing Anthropogenic Aerosols Aerosols-radiation Interactions BC and OC BC                 | Wm <sup>-2</sup>      | radiative forcing from aerosol-radiative effects from black carbon emissions (after stratospheric temperature adjustments)                                                    | 2    |
| Radiative Forcing | Radiative Forcing Anthropogenic Aerosols Aerosols-radiation Interactions BC and OC BC Biomass Burning | Wm <sup>-2</sup>      | radiative forcing from aerosol-radiative effects from black carbon biomass burning emissions (after stratospheric temperature adjustments)                                    | 2    |

**Table S4.** Continued.

| Category          | Variable                                                                                                    | Unit             | Definition                                                                                                                                         | Tier |
|-------------------|-------------------------------------------------------------------------------------------------------------|------------------|----------------------------------------------------------------------------------------------------------------------------------------------------|------|
| Radiative Forcing | Radiative Forcing Anthropogenic Aerosols Aerosols-radiation Interactions BC and OC BC Fossil and Industrial | $\text{Wm}^{-2}$ | radiative forcing from aerosol-radiative effects from black carbon fossil and industrial emissions (after stratospheric temperature adjustments)   | 2    |
| Radiative Forcing | Radiative Forcing Anthropogenic Aerosols Aerosols-radiation Interactions BC and OC OC                       | $\text{Wm}^{-2}$ | radiative forcing from aerosol-radiative effects from organic carbon emissions (after stratospheric temperature adjustments)                       | 2    |
| Radiative Forcing | Radiative Forcing Anthropogenic Aerosols Aerosols-radiation Interactions BC and OC OC Biomass Burning       | $\text{Wm}^{-2}$ | radiative forcing from aerosol-radiative effects from organic carbon biomass burning emissions (after stratospheric temperature adjustments)       | 2    |
| Radiative Forcing | Radiative Forcing Anthropogenic Aerosols Aerosols-radiation Interactions BC and OC OC Fossil and Industrial | $\text{Wm}^{-2}$ | radiative forcing from aerosol-radiative effects from organic carbon fossil and industrial emissions (after stratospheric temperature adjustments) | 2    |
| Radiative Forcing | Radiative Forcing Anthropogenic Aerosols Aerosols-radiation Interactions Biomass Burning                    | $\text{Wm}^{-2}$ | radiative forcing from aerosol-radiative effects from biomass burning emissions (after stratospheric temperature adjustments)                      | 2    |

Table S4. Continued.

| Category          | Variable                                                                                              | Unit             | Definition                                                                                                                                             | Tier |
|-------------------|-------------------------------------------------------------------------------------------------------|------------------|--------------------------------------------------------------------------------------------------------------------------------------------------------|------|
| Radiative Forcing | Radiative Forcing Anthropogenic Aerosols Aerosols-radiation Interactions Biomass Burning BC and OC    | $\text{Wm}^{-2}$ | radiative forcing from aerosol-radiative effects from black and organic carbon biomass burning emissions (after stratospheric temperature adjustments) | 2    |
| Radiative Forcing | Radiative Forcing Anthropogenic Aerosols Aerosols-radiation Interactions Biomass Burning BC and OC BC | $\text{Wm}^{-2}$ | radiative forcing from aerosol-radiative effects from black carbon biomass burning emissions (after stratospheric temperature adjustments)             | 2    |
| Radiative Forcing | Radiative Forcing Anthropogenic Aerosols Aerosols-radiation Interactions Biomass Burning BC and OC OC | $\text{Wm}^{-2}$ | radiative forcing from aerosol-radiative effects from organic carbon biomass burning emissions (after stratospheric temperature adjustments)           | 2    |
| Radiative Forcing | Radiative Forcing Anthropogenic Aerosols Aerosols-radiation Interactions Biomass Burning NH3          | $\text{Wm}^{-2}$ | radiative forcing from aerosol-radiative effects from ammonia biomass burning emissions (after stratospheric temperature adjustments)                  | 2    |
| Radiative Forcing | Radiative Forcing Anthropogenic Aerosols Aerosols-radiation Interactions Biomass Burning Nitrate      | $\text{Wm}^{-2}$ | radiative forcing from aerosol-radiative effects from nitrate biomass burning emissions (after stratospheric temperature adjustments)                  | 2    |

**Table S4.** Continued.

| Category          | Variable                                                                                                    | Unit             | Definition                                                                                                                                                   | Tier |
|-------------------|-------------------------------------------------------------------------------------------------------------|------------------|--------------------------------------------------------------------------------------------------------------------------------------------------------------|------|
| Radiative Forcing | Radiative Forcing Anthropogenic Aerosols Aerosols-radiation Interactions Biomass Burning Sulfate            | $\text{Wm}^{-2}$ | radiative forcing from aerosol-radiative effects from sulfate biomass burning emissions (after stratospheric temperature adjustments)                        | 2    |
| Radiative Forcing | Radiative Forcing Anthropogenic Aerosols Aerosols-radiation Interactions Fossil and Industrial              | $\text{Wm}^{-2}$ | radiative forcing from aerosol-radiative effects from fossil and industrial emissions (after stratospheric temperature adjustments)                          | 2    |
| Radiative Forcing | Radiative Forcing Anthropogenic Aerosols Aerosols-radiation Interactions Fossil and Industrial BC and OC    | $\text{Wm}^{-2}$ | radiative forcing from aerosol-radiative effects from black and organic carbon fossil and industrial emissions (after stratospheric temperature adjustments) | 2    |
| Radiative Forcing | Radiative Forcing Anthropogenic Aerosols Aerosols-radiation Interactions Fossil and Industrial BC and OC BC | $\text{Wm}^{-2}$ | radiative forcing from aerosol-radiative effects from black carbon fossil and industrial emissions (after stratospheric temperature adjustments)             | 2    |
| Radiative Forcing | Radiative Forcing Anthropogenic Aerosols Aerosols-radiation Interactions Fossil and Industrial BC and OC OC | $\text{Wm}^{-2}$ | radiative forcing from aerosol-radiative effects from organic carbon fossil and industrial emissions (after stratospheric temperature adjustments)           | 2    |

**Table S4.** Continued.

| Category          | Variable                                                                                               | Unit             | Definition                                                                                                                                  | Tier |
|-------------------|--------------------------------------------------------------------------------------------------------|------------------|---------------------------------------------------------------------------------------------------------------------------------------------|------|
| Radiative Forcing | Radiative Forcing Anthropogenic Aerosols Aerosols-radiation Interactions Fossil and Industrial NH3     | $\text{Wm}^{-2}$ | radiative forcing from aerosol-radiative effects from ammonia fossil and industrial emissions (after stratospheric temperature adjustments) | 2    |
| Radiative Forcing | Radiative Forcing Anthropogenic Aerosols Aerosols-radiation Interactions Fossil and Industrial Nitrate | $\text{Wm}^{-2}$ | radiative forcing from aerosol-radiative effects from nitrate fossil and industrial emissions (after stratospheric temperature adjustments) | 2    |
| Radiative Forcing | Radiative Forcing Anthropogenic Aerosols Aerosols-radiation Interactions Fossil and Industrial Sulfate | $\text{Wm}^{-2}$ | radiative forcing from aerosol-radiative effects from sulfate fossil and industrial emissions (after stratospheric temperature adjustments) | 2    |
| Radiative Forcing | Radiative Forcing Anthropogenic Aerosols Aerosols-radiation Interactions Mineral Dust                  | $\text{Wm}^{-2}$ | radiative forcing from aerosol-radiative effects from mineral dust emissions (after stratospheric temperature adjustments)                  | 2    |
| Radiative Forcing | Radiative Forcing Anthropogenic Aerosols Aerosols-radiation Interactions NH3                           | $\text{Wm}^{-2}$ | radiative forcing from aerosol-radiative effects from ammonia emissions (after stratospheric temperature adjustments)                       | 2    |

Table S4. Continued.

| Category          | Variable                                                                                               | Unit      | Definition                                                                                                                                  | Tier |
|-------------------|--------------------------------------------------------------------------------------------------------|-----------|---------------------------------------------------------------------------------------------------------------------------------------------|------|
| Radiative Forcing | Radiative Forcing Anthropogenic Aerosols Aerosols-radiation Interactions NH3 Biomass Burning           | $Wm^{-2}$ | radiative forcing from aerosol-radiative effects from ammonia biomass burning emissions (after stratospheric temperature adjustments)       | 2    |
| Radiative Forcing | Radiative Forcing Anthropogenic Aerosols Aerosols-radiation Interactions NH3 Fossil and Industrial     | $Wm^{-2}$ | radiative forcing from aerosol-radiative effects from ammonia fossil and industrial emissions (after stratospheric temperature adjustments) | 2    |
| Radiative Forcing | Radiative Forcing Anthropogenic Aerosols Aerosols-radiation Interactions Nitrate                       | $Wm^{-2}$ | radiative forcing from aerosol-radiative effects from nitrate emissions (after stratospheric temperature adjustments)                       | 2    |
| Radiative Forcing | Radiative Forcing Anthropogenic Aerosols Aerosols-radiation Interactions Nitrate Biomass Burning       | $Wm^{-2}$ | radiative forcing from aerosol-radiative effects from nitrate biomass burning emissions (after stratospheric temperature adjustments)       | 2    |
| Radiative Forcing | Radiative Forcing Anthropogenic Aerosols Aerosols-radiation Interactions Nitrate Fossil and Industrial | $Wm^{-2}$ | radiative forcing from aerosol-radiative effects from nitrate fossil and industrial emissions (after stratospheric temperature adjustments) | 2    |

**Table S4.** Continued.

| Category          | Variable                                                                                               | Unit             | Definition                                                                                                                                                      | Tier |
|-------------------|--------------------------------------------------------------------------------------------------------|------------------|-----------------------------------------------------------------------------------------------------------------------------------------------------------------|------|
| Radiative Forcing | Radiative Forcing Anthropogenic Aerosols Aerosols-radiation Interactions Other                         | $\text{Wm}^{-2}$ | radiative forcing from aerosol-radiative effects not covered in the other categories (after stratospheric temperature adjustments) (please specify in comments) | 2    |
| Radiative Forcing | Radiative Forcing Anthropogenic Aerosols Aerosols-radiation Interactions Sulfate                       | $\text{Wm}^{-2}$ | radiative forcing from aerosol-radiative effects from sulfate emissions (after stratospheric temperature adjustments)                                           | 2    |
| Radiative Forcing | Radiative Forcing Anthropogenic Aerosols Aerosols-radiation Interactions Sulfate Biomass Burning       | $\text{Wm}^{-2}$ | radiative forcing from aerosol-radiative effects from sulfate biomass burning emissions (after stratospheric temperature adjustments)                           | 2    |
| Radiative Forcing | Radiative Forcing Anthropogenic Aerosols Aerosols-radiation Interactions Sulfate Fossil and Industrial | $\text{Wm}^{-2}$ | radiative forcing from aerosol-radiative effects from sulfate fossil and industrial emissions (after stratospheric temperature adjustments)                     | 2    |
| Radiative Forcing | Radiative Forcing Anthropogenic Albedo Change                                                          | $\text{Wm}^{-2}$ | radiative forcing from albedo change (after stratospheric temperature adjustments)                                                                              | 2    |
| Radiative Forcing | Radiative Forcing Anthropogenic CH <sub>4</sub>                                                        | $\text{Wm}^{-2}$ | radiative forcing (after stratospheric temperature adjustments) of CH <sub>4</sub>                                                                              | 2    |
| Radiative Forcing | Radiative Forcing Anthropogenic CO <sub>2</sub>                                                        | $\text{Wm}^{-2}$ | radiative forcing (after stratospheric temperature adjustments) of CO <sub>2</sub>                                                                              | 1    |



**Table S4.** Continued.

| Category          | Variable                     |                          | Unit             | Definition                                                                                                                                                                | Tier |
|-------------------|------------------------------|--------------------------|------------------|---------------------------------------------------------------------------------------------------------------------------------------------------------------------------|------|
| Radiative Forcing | Radiative Gases              | Forcing\Anthropogenic\F- | $\text{Wm}^{-2}$ | radiative forcing (after stratospheric temperature adjustments) of F-gases                                                                                                | 2    |
| Radiative Forcing | Radiative Gases\HFC          | Forcing\Anthropogenic\F- | $\text{Wm}^{-2}$ | radiative forcing (after stratospheric temperature adjustments) of hydrofluorocarbons (HFCs, as defined by Table 8.A.1 of AR5) not controlled under the Montreal protocol | 2    |
| Radiative Forcing | Radiative Gases\HFC\HFC125   | Forcing\Anthropogenic\F- | $\text{Wm}^{-2}$ | radiative forcing (after stratospheric temperature adjustments) of HFC125                                                                                                 | 2    |
| Radiative Forcing | Radiative Gases\HFC\HFC134a  | Forcing\Anthropogenic\F- | $\text{Wm}^{-2}$ | radiative forcing (after stratospheric temperature adjustments) of HFC134a                                                                                                | 2    |
| Radiative Forcing | Radiative Gases\HFC\HFC143a  | Forcing\Anthropogenic\F- | $\text{Wm}^{-2}$ | radiative forcing (after stratospheric temperature adjustments) of HFC143a                                                                                                | 2    |
| Radiative Forcing | Radiative Gases\HFC\HFC152a  | Forcing\Anthropogenic\F- | $\text{Wm}^{-2}$ | radiative forcing (after stratospheric temperature adjustments) of HFC152a                                                                                                | 2    |
| Radiative Forcing | Radiative Gases\HFC\HFC227ea | Forcing\Anthropogenic\F- | $\text{Wm}^{-2}$ | radiative forcing (after stratospheric temperature adjustments) of HFC227ea                                                                                               | 2    |
| Radiative Forcing | Radiative Gases\HFC\HFC23    | Forcing\Anthropogenic\F- | $\text{Wm}^{-2}$ | radiative forcing (after stratospheric temperature adjustments) of HFC23                                                                                                  | 2    |
| Radiative Forcing | Radiative Gases\HFC\HFC236fa | Forcing\Anthropogenic\F- | $\text{Wm}^{-2}$ | radiative forcing (after stratospheric temperature adjustments) of HFC236fa                                                                                               | 2    |
| Radiative Forcing | Radiative Gases\HFC\HFC245fa | Forcing\Anthropogenic\F- | $\text{Wm}^{-2}$ | radiative forcing (after stratospheric temperature adjustments) of HFC245fa                                                                                               | 2    |

**Table S4.** Continued.

| Category          | Variable                                                | Unit             | Definition                                                                                                                   | Tier |
|-------------------|---------------------------------------------------------|------------------|------------------------------------------------------------------------------------------------------------------------------|------|
| Radiative Forcing | Radiative Forcing Anthropogenic F-Gases HFC HFC32       | $\text{Wm}^{-2}$ | radiative forcing (after stratospheric temperature adjustments) of HFC32                                                     | 2    |
| Radiative Forcing | Radiative Forcing Anthropogenic F-Gases HFC HFC365mfc   | $\text{Wm}^{-2}$ | radiative forcing (after stratospheric temperature adjustments) of HFC365mfc                                                 | 2    |
| Radiative Forcing | Radiative Forcing Anthropogenic F-Gases HFC HFC43-10mee | $\text{Wm}^{-2}$ | radiative forcing (after stratospheric temperature adjustments) of HFC43-10mee                                               | 2    |
| Radiative Forcing | Radiative Forcing Anthropogenic F-Gases NF3             | $\text{Wm}^{-2}$ | radiative forcing (after stratospheric temperature adjustments) of nitrogen trifluoride ( $\text{NF}_3$ )                    | 2    |
| Radiative Forcing | Radiative Forcing Anthropogenic F-Gases PFC             | $\text{Wm}^{-2}$ | radiative forcing (after stratospheric temperature adjustments) of perfluorocarbons (PFCs, as defined by Table 8.A.1 of AR5) | 2    |
| Radiative Forcing | Radiative Forcing Anthropogenic F-Gases PFC C2F6        | $\text{Wm}^{-2}$ | radiative forcing (after stratospheric temperature adjustments) of $\text{C}_2\text{F}_6$                                    | 2    |
| Radiative Forcing | Radiative Forcing Anthropogenic F-Gases PFC C3F8        | $\text{Wm}^{-2}$ | radiative forcing (after stratospheric temperature adjustments) of $\text{C}_3\text{F}_8$                                    | 2    |
| Radiative Forcing | Radiative Forcing Anthropogenic F-Gases PFC C4F10       | $\text{Wm}^{-2}$ | radiative forcing (after stratospheric temperature adjustments) of $\text{C}_4\text{F}_{10}$                                 | 2    |
| Radiative Forcing | Radiative Forcing Anthropogenic F-Gases PFC C5F12       | $\text{Wm}^{-2}$ | radiative forcing (after stratospheric temperature adjustments) of $\text{C}_5\text{F}_{12}$                                 | 2    |
| Radiative Forcing | Radiative Forcing Anthropogenic F-Gases PFC C6F14       | $\text{Wm}^{-2}$ | radiative forcing (after stratospheric temperature adjustments) of $\text{C}_6\text{F}_{14}$                                 | 2    |

**Table S4.** Continued.

| Category          | Variable                                                 | Unit             | Definition                                                                                                       | Tier |
|-------------------|----------------------------------------------------------|------------------|------------------------------------------------------------------------------------------------------------------|------|
| Radiative Forcing | Radiative Forcing Anthropogenic F-Gases PFC C7F16        | $\text{Wm}^{-2}$ | radiative forcing (after stratospheric temperature adjustments) of $\text{C}_7\text{F}_{16}$                     | 2    |
| Radiative Forcing | Radiative Forcing Anthropogenic F-Gases PFC C8F18        | $\text{Wm}^{-2}$ | radiative forcing (after stratospheric temperature adjustments) of $\text{C}_8\text{F}_{18}$                     | 2    |
| Radiative Forcing | Radiative Forcing Anthropogenic F-Gases PFC C4F8         | $\text{Wm}^{-2}$ | radiative forcing (after stratospheric temperature adjustments) of $\text{C}-\text{C}_4\text{F}_8$               | 2    |
| Radiative Forcing | Radiative Forcing Anthropogenic F-Gases PFC CF4          | $\text{Wm}^{-2}$ | radiative forcing (after stratospheric temperature adjustments) of $\text{CF}_4$                                 | 2    |
| Radiative Forcing | Radiative Forcing Anthropogenic F-Gases SF6              | $\text{Wm}^{-2}$ | radiative forcing (after stratospheric temperature adjustments) of sulfur hexafluoride ( $\text{SF}_6$ )         | 2    |
| Radiative Forcing | Radiative Forcing Anthropogenic F-Gases SO2F2            | $\text{Wm}^{-2}$ | radiative forcing (after stratospheric temperature adjustments) of sulfuryl fluoride ( $\text{SO}_2\text{F}_2$ ) | 2    |
| Radiative Forcing | Radiative Forcing Anthropogenic Montreal Gases           | $\text{Wm}^{-2}$ | radiative forcing (after stratospheric temperature adjustments) of Montreal gases                                | 2    |
| Radiative Forcing | Radiative Forcing Anthropogenic Montreal Gases CCl4      | $\text{Wm}^{-2}$ | radiative forcing (after stratospheric temperature adjustments) of $\text{CCl}_4$                                | 2    |
| Radiative Forcing | Radiative Forcing Anthropogenic Montreal Gases CFC       | $\text{Wm}^{-2}$ | radiative forcing (after stratospheric temperature adjustments) of CFC gases (as defined by Table 8.A.1 of AR5)  | 2    |
| Radiative Forcing | Radiative Forcing Anthropogenic Montreal Gases CFC CFC11 | $\text{Wm}^{-2}$ | radiative forcing (after stratospheric temperature adjustments) of $\text{CFC}_{11}$                             | 2    |

**Table S4.** Continued.

| Category          | Variable                                                                          | Unit                      | Definition                                                                                          | Tier |
|-------------------|-----------------------------------------------------------------------------------|---------------------------|-----------------------------------------------------------------------------------------------------|------|
| Radiative Forcing | Radiative<br>ing Anthropogenic Montreal<br>Gases CFC CFC113                       | Forc-<br>$\text{Wm}^{-2}$ | radiative forcing (after stratospheric temperature adjustments) of CFC113                           | 2    |
| Radiative Forcing | Radiative<br>ing Anthropogenic Montreal<br>Gases CFC CFC114                       | Forc-<br>$\text{Wm}^{-2}$ | radiative forcing (after stratospheric temperature adjustments) of CFC114                           | 2    |
| Radiative Forcing | Radiative<br>ing Anthropogenic Montreal<br>Gases CFC CFC115                       | Forc-<br>$\text{Wm}^{-2}$ | radiative forcing (after stratospheric temperature adjustments) of CFC115                           | 2    |
| Radiative Forcing | Radiative<br>ing Anthropogenic Montreal<br>Gases CFC CFC12                        | Forc-<br>$\text{Wm}^{-2}$ | radiative forcing (after stratospheric temperature adjustments) of CFC12                            | 2    |
| Radiative Forcing | Radiative<br>ing Anthropogenic Montreal<br>Gases CH <sub>2</sub> Cl <sub>2</sub>  | Forc-<br>$\text{Wm}^{-2}$ | radiative forcing (after stratospheric temperature adjustments) of CH <sub>2</sub> Cl <sub>2</sub>  | 2    |
| Radiative Forcing | Radiative<br>ing Anthropogenic Montreal<br>Gases CH <sub>3</sub> Br               | Forc-<br>$\text{Wm}^{-2}$ | radiative forcing (after stratospheric temperature adjustments) of CH <sub>3</sub> Br               | 2    |
| Radiative Forcing | Radiative<br>ing Anthropogenic Montreal<br>Gases CH <sub>3</sub> CCl <sub>3</sub> | Forc-<br>$\text{Wm}^{-2}$ | radiative forcing (after stratospheric temperature adjustments) of CH <sub>3</sub> CCl <sub>3</sub> | 2    |
| Radiative Forcing | Radiative<br>ing Anthropogenic Montreal<br>Gases CH <sub>3</sub> Cl               | Forc-<br>$\text{Wm}^{-2}$ | radiative forcing (after stratospheric temperature adjustments) of CH <sub>3</sub> Cl               | 2    |
| Radiative Forcing | Radiative<br>ing Anthropogenic Montreal<br>Gases CHCl <sub>3</sub>                | Forc-<br>$\text{Wm}^{-2}$ | radiative forcing (after stratospheric temperature adjustments) of CHCl <sub>3</sub>                | 2    |

**Table S4.** Continued.

| Category          | Variable                                                       | Unit                      | Definition                                                                                                   | Tier |
|-------------------|----------------------------------------------------------------|---------------------------|--------------------------------------------------------------------------------------------------------------|------|
| Radiative Forcing | Radiative<br>Forcing Anthropogenic Montreal<br>Gases Halon1202 | Forc-<br>$\text{Wm}^{-2}$ | radiative forcing (after stratospheric temperature adjustments) of Halon-1202                                | 2    |
| Radiative Forcing | Radiative<br>Forcing Anthropogenic Montreal<br>Gases Halon1211 | Forc-<br>$\text{Wm}^{-2}$ | radiative forcing (after stratospheric temperature adjustments) of Halon-1211                                | 2    |
| Radiative Forcing | Radiative<br>Forcing Anthropogenic Montreal<br>Gases Halon1301 | Forc-<br>$\text{Wm}^{-2}$ | radiative forcing (after stratospheric temperature adjustments) of Halon-1301                                | 2    |
| Radiative Forcing | Radiative<br>Forcing Anthropogenic Montreal<br>Gases Halon2402 | Forc-<br>$\text{Wm}^{-2}$ | radiative forcing (after stratospheric temperature adjustments) of Halon-2402                                | 2    |
| Radiative Forcing | Radiative<br>Forcing Anthropogenic Montreal<br>Gases HCFC141b  | Forc-<br>$\text{Wm}^{-2}$ | radiative forcing (after stratospheric temperature adjustments) of HCFC141b                                  | 2    |
| Radiative Forcing | Radiative<br>Forcing Anthropogenic Montreal<br>Gases HCFC142b  | Forc-<br>$\text{Wm}^{-2}$ | radiative forcing (after stratospheric temperature adjustments) of HCFC22                                    | 2    |
| Radiative Forcing | Radiative<br>Forcing Anthropogenic Montreal<br>Gases HCFC22    | Forc-<br>$\text{Wm}^{-2}$ | radiative forcing (after stratospheric temperature adjustments) of HCFC22                                    | 2    |
| Radiative Forcing | Radiative Forcing Anthropogenic N2O                            | $\text{Wm}^{-2}$          | radiative forcing (after stratospheric temperature adjustments) of N <sub>2</sub> O                          | 2    |
| Radiative Forcing | Radiative Forcing Anthropogenic Other                          | $\text{Wm}^{-2}$          | radiative forcing from factors not covered in other categories (after stratospheric temperature adjustments) | 2    |

**Table S4.** Continued.

| Category          | Variable                                            |         | Unit             | Definition                                                                                                                | Tier |
|-------------------|-----------------------------------------------------|---------|------------------|---------------------------------------------------------------------------------------------------------------------------|------|
| Radiative Forcing | Radiative Forcing Anthropogenic Stratospheric Ozone | Forcing | $\text{Wm}^{-2}$ | radiative forcing from stratospheric ozone (after stratospheric temperature adjustments)                                  | 2    |
| Radiative Forcing | Radiative Forcing Anthropogenic Tropospheric Ozone  | Forcing | $\text{Wm}^{-2}$ | radiative forcing from tropospheric ozone (after stratospheric temperature adjustments)                                   | 2    |
| Radiative Forcing | Radiative Forcing Natural                           |         | $\text{Wm}^{-2}$ | radiative forcing from all natural drivers, i.e. solar and volcanic forcing (after stratospheric temperature adjustments) | 2    |
| Radiative Forcing | Radiative Forcing Natural Solar                     |         | $\text{Wm}^{-2}$ | radiative forcing from variations in solar irradiance (after stratospheric temperature adjustments)                       | 2    |
| Radiative Forcing | Radiative Forcing Natural Volcanic                  |         | $\text{Wm}^{-2}$ | radiative forcing due to volcanic eruptions (after stratospheric temperature adjustments)                                 | 2    |

## References

- Gidden, M. J., Riahi, K., Smith, S. J., Fujimori, S., Luderer, G., Kriegler, E., van Vuuren, D. P., van den Berg, M., Feng, L., Klein, D., Calvin, K., Doelman, J. C., Frank, S., Fricko, O., Harmsen, M., Hasegawa, T., Havlik, P., Hilaire, J., Hoesly, R., Horing, J., Popp, A., Stehfest, E., and Takahashi, K.: Global emissions pathways under different socioeconomic scenarios for use in CMIP6: a dataset of harmonized emissions trajectories through the end of the century, *Geoscientific Model Development*, 12, 1443–1475, <https://doi.org/10.5194/gmd-12-1443-2019>, 2019.
- 5
